# Supplementary material for: Exploring the degree of long-range order/disorder in indaceno-based photovoltaic small molecules using data-driven machine learning analysis
Source: Royal Society of Chemistry journal article supplement (doi:10.1039/d5ra02748a), 2025-01-01
Supplement: d5ra02748a3.xlsx [file d5ra02748a3.xlsx]

## Sheet: Sheet1
SMILES	SA
CCCCC(CC)CC1(C2=CC3=C(C=C2C4=C1C=C(S4)C5=CC=C(C6=NSN=C56)/C=C\7/C(=O)N(C(=S)S7)CC)C(C8=C3SC(=C8)C9=CC=C(C1=NSN=C91)/C=C\1/C(=O)N(C(=S)S1)CC)(CC(CC)CCCC)CC(CC)CCCC)CC(CC)CCCC	0.0488976
CCCCC(CC)CC1(C2=CC3=C(C=C2C4=C1C=C(S4)C5=CC=C(C6=NSN=C56)C=C7C(=O)N(C(=S)S7)CC)C(C8=C3SC(=C8)C9=CC=C(C1=NSN=C91)C=C1C(=O)N(C(=S)S1)CC)(CC(CC)CCCC)CC(CC)CCCC)CC(CC)CCCC	0.0488976
CCCCC(CC)CC1(C2=CC3=C(C=C2C4=C1C=C(S4)C5=CC=C(C6=NSN=C56)/C=C/7\C(=O)N(C(=S)S7)CC)C(C8=C3SC(=C8)C9=CC=C(C1=NSN=C91)/C=C\1/C(=O)N(C(=S)S1)CC)(CC(CC)CCCC)CC(CC)CCCC)CC(CC)CCCC	0.0488976
CCCCCCCCC1(C2=CC3=C(C=C2C4=C1C=C(S4)C5=CC=C(C6=NSN=C56)/C=C\7/C(=O)N(C(=S)S7)CC)C(C8=C3SC(=C8)C9=CC=C(C1=NSN=C91)/C=C\1/C(=O)N(C(=S)S1)CC)(CCCCCCCC)CCCCCCCC)CCCCCCCC	0.0477306
CCCCCCCCCC1(C2=CC3=C(C=C2C4=C1C=C(S4)C5=CC=C(C6=NSN=C56)/C=C\7/C(=O)N(C(=S)S7)CC)C(C8=C3SC(=C8)C9=CC=C(C1=NSN=C91)/C=C\1/C(=O)N(C(=S)S1)CC)(CCCCCCCCC)CCCCCCCCC)CCCCCCCCC	0.0451421
CCCCCCCCC1(C2=CC3=CC4=C(C=C3C=C2C5=C1C=C(S5)C6=CC=C(C7=NSN=C67)/C=C\8/C(=O)N(C(=S)S8)CC)C(C9=C4SC(=C9)C1=CC=C(C2=NSN=C12)/C=C\1/C(=O)N(C(=S)S1)CC)(CCCCCCCC)CCCCCCCC)CCCCCCCC	0.0521397
CCCCC(CC)CC1(C2=CC3=CC4=C(C=C3C=C2C5=C1C=C(S5)C6=CC=C(C7=NSN=C67)/C=C\8/C(=O)N(C(=S)S8)CC)C(C9=C4SC(=C9)C1=CC=C(C2=NSN=C12)/C=C\1/C(=O)N(C(=S)S1)CC)(CC(CC)CCCC)CC(CC)CCCC)CC(CC)CCCC	0.0533766
CCCCC(CC)CC1(C2=CC3=CC4=C(C=C3C=C2C5=C1C=C(S5)C6=CC=C(C7=NSN=C67)/C=C\8/C(=O)N(C(=S)S8)CC)C(C9=C4SC(=C9)C1=CC=C(C2=NSN=C12)/C=C\1/C(=O)N(C(=S)S1)CC)(CC(CC)CCCC)CC(CC)CCCC)CC(C)CC	0.0557603
CCCCC(CC)CC1(C2=CC3=C(C=C2C4=C1C=C(S4)C5=CC=C(C6=NSN=C56)/C=C\7/C(=O)N(C(=C(C#N)C#N)S7)CC)C(C8=C3SC(=C8)C9=CC=C(C1=NSN=C91)/C=C\1/C(=O)N(C(=C(C#N)C#N)S1)CC)(CC(CC)CCCC)CC(CC)CCCC)CC(CC)CCCC	0.0588224
CCCCC(CC1(C2=C(SC(=C2)C3=CC=C(C4=NSN=C34)/C=C/5\SC(=S)N(C5=O)CC)C6=C1C=C(S6)C7=CC=C(C8=NSN=C78)/C=C/9\SC(=S)N(C9=O)CC)CC(CCCC)CC)CC	0.0581622
CCCCCCCCC1=CC=C(C=C1)C2(C3=C(C4=C2C5=C(S4)C6=C(S5)C7=C(C6(C8=CC=C(C=C8)C)C9=CC=C(C=C9)C)C=C(S7)C1=CC=C(/C(=N/S)/C1=N)/C=C\1/C(=O)N(C(=S)S1)CC)SC(=C3)C1=CC=C(C2=NSN=C12)/C=C\1/C(=O)N(C(=S)S1)CC)C1=CC=C(C=C1)C	0.0696189
CCN1C(=S)S/C(=C\C2=CC=C(C3=NSN=C23)C4=CC5=C(S4)C6=C(C5(C7=CC=C(C=C7)C)C8=CC=C(C=C8)C)C9=C(S6)C2=C(S9)C3=C(C2(C2=CC=C(C=C2)C)C2=CC=C(C=C2)C)C=C(S3)C2=CC=C(C3=NSN=C23)/C=C/2\SC(=S)N(C2=O)CC)/C1=O	0.09221
CCCCCCCCC1=CC=C(C=C1)C2(C3=C(SC4=C3SC5=C4C(C6=C5SC(=C6)C7=CC=C(C8=NSN=C78)/C=C/9\SC(=S)N(C9=O)CC)(C1=CC=C(C=C1)CCCCCCCC)C1=CC=C(C=C1)CCCCCCCC)C1=C2C=C(S1)C1=CC=C(C2=NSN=C12)/C=C/1\SC(=S)N(C1=O)CC)C1=CC=C(C=C1)CCCCCCCC	0.0624225
CCC1=CC=C(C=C1)C2(C3=C(C4=C2C5=C(S4)C6=C(S5)C7=C(C6(C8=CC=C(C=C8)C)C9=CC=C(C=C9)C)C=C(S7)C1=CC=C(C2=NSN=C12)/C=C\1/C(=O)N(C(=S)S1)CC)SC(=C3)C1=CC=C(C2=NSN=C12)/C=C\1/C(=O)N(C(=S)S1)CC)C1=CC=C(C=C1)C	0.0906648
CCN1C(=O)/C(=C/C2=CC=C(C3=NSN=C23)C4=CC5=C(S4)C6=CC7=C(C=C6C5(C)C)C8=C(C7(C)C)C=C(S8)C9=CC=C(C2=NSN=C92)/C=C\2/C(=O)N(C(=S)S2)CC)/SC1=S	0.0797356
CCN1C(=O)/C(=C/C2=CC=C(C3=NSN=C23)C4=CC5=C(S4)C6=CC7=C(C=C6C5(CC(C)C)CC(C)C)C8=C(C7(CC(C)C)CC(C)C)C=C(S8)C9=CC=C(C2=NSN=C92)/C=C\2/C(=O)N(C(=S)S2)CC)/SC1=S	0.0639161
CCN1C(=S)S/C(=C\C2=CC=C(C3=NSN=C23)C4=CC5=C(S4)C6=C(C5(CC(C)C)CC(C)C)C=C(S6)C7=CC=C(C8=NSN=C78)/C=C/9\SC(=S)N(C9=O)CC)/C1=O	0.0692168
CCN1C(=O)/C(=C/C2=CC=C(C3=NSN=C23)C4=CC5=C(S4)C6=C(C5(CC(C)C)CC(C)C)C=C7C=C8C(=CC7=C6)C(C9=C8SC(=C9)C2=CC=C(C3=NSN=C23)/C=C(/C(=O)N(C)CC)\SC=S)(CC(C)C)CC(C)C)/SC1=S	0.0667783
CCN1C(=O)/C(=C/C2=CC=C(C3=NSN=C23)C4=CC5=C(S4)C6=CC7=C(C=C6[Ge]5(C(C)C)C(C)C)C8=C([Ge]7(C(C)C)C(C)C)C=C(S8)C9=CC=C(C2=NSN=C92)/C=C\2/C(=O)N(C(=S)S2)CC)/SC1=S	0.0626601
CCN1C(=O)/C(=C/C2=CC=C(C3=NSN=C23)C4=CC5=C(S4)C6=C([Ge]5(CC(C)C)CC(C)C)C=C7C=C8C(=CC7=C6)[Ge](C9=C8SC(=C9)C2=CC=C(C3=NSN=C23)/C=C(/C(=O)N(C)CC)\SC=S)(CC(C)C)CC(C)C)/SC1=S	0.0612686
CCN1C(=O)/C(=C/C2=CC=C(C3=NSN=C23)C4=CC5=C(S4)C6=CC7=C(C=C6C5(CC(C)C)CC(C)C)C8=C(C7(CC(C)C)CC(C)C)C=C(S8)C9=CC=C(C2=NSN=C92)/C=C\2/C(=O)N(C(=C(C#N)C#N)S2)CC)/SC1=C(C#N)C#N	0.0760109
CCN1C(=O)/C(=C/C2=CC=C(C3=NSN=C23)C4=CC5=C(S4)C6=CC7=C(C=C6C5(C)C)C8=C(C7(C)C)C=C(S8)C9=CC=C(C2=NSN=C92)/C=C\2/C(=O)N(C(=C(C#N)C#N)S2)CC)/SC1=C(C#N)C#N	0.0936965
CCCCC(CC)CC1(C2=C(C3=C1C=C(S3)C4=CC=C(C5=NSN=C45)/C=C\6/C(=O)N(C(=S)S6)CC)SC(=C2)C7=CC=C(C8=NSN=C78)/C=C\9/C(=O)N(C(S9)S)CC)CC(CC)CCCC	0.0580649
CCCCCCCCC1=CC=C(C=C1)C2(C3=C(C4=C2C5=C(S4)C6=C(S5)C7=C(C6(C8=CC=C(C=C8)CCCCCCCC)C9=CC=C(C=C9)CCCCCCCC)C=C(S7)C1=CC=C(C2=NSN=C12)/C=C\1/C(=O)N(C(=S)S1)CC)SC(=C3)C1=CC=C(C2=NSN=C12)/C=C\1/C(=O)N(C(=S)S1)CC)C1=CC=C(C=C1)C	0.0679066
CCCCCCCCC1(C2=CC3=C(C=C2C4=C1C=C(S4)C5=CC=C(C6=NSN=C56)/C=C\7/C(=S)N(C(=O)S7)CC)C(C8=C3SC(=C8)C9=CC=C(C1C9NSN1)/C=C\1/C(=O)N(C(=S)S1)CC)(CCCCCCCC)CCCCCCCC)CCCCCCCC	0.0357121
CCCCC(CC)CC1(C2=CC3=C(C=C2C4=C1C=C(S4)C5=CC=C(C6=NSN=C56)/C=C\7/C(=O)N(C(S7)S)CC)C(C8=C3SC(=C8)C9=CC=C(C1=NSN=C91)/C=C\1/C(=O)N(C(=S)S1)CC)(CC(CC)CCCC)CC(CC)CCCC)CC(CC)CCCC	0.0488374
CCCCCCC1=S=C(C=C1)C2=CC=C(S2)C3=CC=C(C4=NSN=C34)C5=CC6=C(S5)C7=CC8=C(C=C7C6(CC(CC)CCCC)CC(CC)CCCC)C9=C(C8(CC(CC)CCCC)CC(CC)CCCC)C=C(S9)C1=CC=C(S1)C1=C2C(=C(N(C2=O)CCCCCC)C2=CC=C(S2)C2=CC3=C(S2)C2=C(C3(CC(CC)CCCC)CC(CC)CCCC)C=C3C(=C2)C(C2=C3SC(=C2)C2=CC=C(C3=NSN=C23)C2=CC=C(S2)C2=CC=C(S2)CCCCCC)(CC(CC)CCCC)CC(CC)CCCC)C(=O)N1CCCCCC	0.0463725
CCCCC(CC)CC1=CC=C(C=C1)C2(C3=CC4=C(C=C3C5=C2C=C(S5)C6=CC=C(C7=NSN=C67)/C=C\8/C(=O)N(C(=S)S8)CC)C(C9=C4SC(=C9)C1=C2C(=C(C=C1)/C=C\1/C(=O)N(C(=S)S1)CC)N=S=N2)(C1=CC=C(C=C1)CC(CC)CCCC)C1=CC=C(C=C1)CC(CC)CCCC)C1=CC=C(C=C1)CC(CC)CCCC	0.0555425
CCCCCCCCC1=CC=C(C=C1)C2(C3=CC4=C(C=C3C5=C2C=C(S5)C6=CC=C(C7=NSN=C67)/C=C\8/C(=O)N(C(=S)S8)CC)C(C9=C4SC(=C9)C1=C2C(=C(C=C1)/C=C\1/C(=O)N(C(=S)S1)CC)N=S=N2)(C1=CC=C(C=C1)CCCCCCCC)C1=CC=C(C=C1)CCCCCCCC)C1=CC=C(C=C1)CCCCCCCC	0.0544429
CCCCCCCCC1(C2=CC3=C(C=C2C4=C1C=C(S4)C5=CC=C(C6=NSN=C56)/C=C/7\C(=O)N(C(=S)S7)CC)C(C8=C3SC(=C8)C9=CC=C(C1=NSN=C91)/C=C/1\C(=O)N(C(=S)S1)CC)(CCCCCCCC)CCCCCCCC)CCCCCCCC	0.0477306
CCCCC(CC)CC1(C2=CC3=C(C=C2C4=C1C=C(S4)C5=CC=C(C6=NSN=C56)/C=C/7\C(=O)N(C(=S)S7)CC)C(C8=C3SC(=C8)C9=C1C(=C(C=C9)/C=C/2\C(=O)N(C(=S)S2)CC)N=S=N1)(CC(CC)CCCC)CC(CC)CCCC)CC(CC)CCCC	0.0427854
CCCCCCC1=CC=C(C=C1)C2(C3=CC4=C(C=C3C5=C2C=C(S5)C6=CC=C(C7=NSN=C67)/C=C\8/C(=O)N(C(=S)S8)CC)C(C9=C4SC(=C9)C1=C2C(=C(C=C1)/C=C\1/C(=O)N(C(=S)S1)CC)N=S=N2)(C1=CC=C(C=C1)CCCCCC)C1=CC=C(C=C1)CCCCCC)C1=CC=C(C=C1)CCCCCC	0.0601669
CCCCCCCCC1(C2=CC3=C(C=C2C4=C1C=C(S4)C5=CC=C(C6=NSN=C56)C=C7C(=O)N(C(=S)S7)CC)C(C8=C3SC(=C8)C9=CC=C(C1=NSN=C91)C=C1C(=O)N(C(=S)S1)CC)(CCCCCCCC)CCCCCCCC)CCCCCCCC	0.0477306
CCCCCCC1=CC=C(C=C1)C2(C3=CC4=C(C=C3C5=C2C=C(S5)C6=CC=C(C7=NSN=C67)/C=C/8\C(=O)N(C(=S)S8)CC)C(C9=C4SC(=C9)C1=CC=C(C2=NSN=C12)/C=C\1/C(=O)N(C(=S)S1)CC)(C1=CC=C(C=C1)CCCCCC)C1=CC=C(C=C1)CCCCCC)C1=CC=C(C=C1)CCCCCC	0.0656366
CCCCC(CC)CC1(C2=CC3=C(C=C2C4=C1C=C(S4)C5=CC=C(C6=NSN=C56)/C=C\7/C(=O)N(C(=O)S7)CC)C(C8=C3SC(=C8)C9=CC=C(C1=NSN=C91)/C=C\1/C(=O)N(C(=S)S1)CC)(CC(CC)CCCC)CC(CC)CCCC)CC(CC)CCCC	0.0493826
CCCCCCC1=CC=C(C=C1)C2(C3=CC4=C(C=C3C5=C2C6=C(S5)C=C(S6)/C=C\7/C(=C(C#N)C#N)C8=CC(=C(C=C8C7=O)F)F)C(C9=C4SC1=C9SC(=C1)/C=C\1/C(=C(C#N)C#N)C2=CC(=C(C=C2C1=O)F)F)(C1=CC=C(C=C1)CCCCCC)C1=CC=C(C=C1)CCCCCC)C1=CC=C(C=C1)CCCCCC	0.0677988
CCCCCCC1=CC=C(C=C1)C2(C3=CC4=C(C=C3C5=C2C6=C(S5)C=C(S6)C=C7C(=C(C#N)C#N)C8=CC(=C(C=C8C7=O)F)F)C(C9=C4SC1=C9SC(=C1)C=C1C(=C(C#N)C#N)C2=CC(=C(C=C2C1=O)F)F)(C1=CC=C(C=C1)CCCCCC)C1=CC=C(C=C1)CCCCCC)C1=CC=C(C=C1)CCCCCC	0.0677988
CCCCCCC1=CC=C(C=C1)C2(C3=CC4=C(C=C3C5=C2C6=C(S5)C=C(S6)/C=C/7\C(=C(C#N)C#N)C8=CC(=C(C=C8C7=O)F)F)C(C9=C4SC1=C9SC(=C1)/C=C\1/C(=C(C#N)C#N)C2=CC(=C(C=C2C1=O)F)F)(C1=CC=C(C=C1)CCCCCC)C1=CC=C(C=C1)CCCCCC)C1=CC=C(C=C1)CCCCCC	0.0677988
CCCCCCC1=CC=C(C=C1)C2(C3=CC4=C(C=C3C5=C2C6=C(S5)C=C(S6)/C=C/7\C(=C(C#N)C#N)C8=CC(=C(C=C8C7=O)F)F)C(C9=C4SC1=C9SC(=C1)/C=C/1\C(=C(C#N)C#N)C2=CC(=C(C=C2C1=O)F)F)(C1=CC=C(C=C1)CCCCCC)C1=CC=C(C=C1)CCCCCC)C1=CC=C(C=C1)CCCCCC	0.0677988
CCCCCCC1=CC=C(C=C1)C2(C3=CC4=C(C=C3C5=C2C6=C(S5)C=C(S6)/C=C\7/C(=C(C#N)C#N)C8=CC=CC=C8C7=O)C(C9=C4SC1=C9SC(=C1)/C=C\1/C(=C(C#N)C#N)C2=CC=CC=C2C1=O)(C1=CC=C(C=C1)CCCCCC)C1=CC=C(C=C1)CCCCCC)C1=CC=C(C=C1)CCCCCC	0.070672
CCCCCCC1(C2=CC3=C(C=C2C4=C1C=C(S4)/C=C\5/C(=C(C#N)C#N)C6=CC=CC=C6C5=O)C(C7=C3SC(=C7)/C=C\8/C(=C(C#N)C#N)C9=CC=CC=C9C8=O)(CCCCCC)CCCCCC)CCCCCC	0.048332
CCCCCCC1=CC=C(C=C1)CS/C(=C\2/C3=C(C4=C2C=C5C(=C4)C(=C(SC6=CC=C(C=C6)CCCCCC)SC7=CC=C(C=C7)CCCCCC)C8=C5SC(=C8)/C=C\9/C(=C(C#N)C#N)C1=CC(=C(C=C1C9=O)F)F)SC(=C3)/C=C\1/C(=C(C#N)C#N)C2=CC(=C(C=C2C1=O)F)F)/SCC1=CCC(C=C1)(C)CCCCCC	0.0470182
CCCCCCC1=CC=C(C=C1)CSC(=C2C3=CC4=C(C=C3C5=C2C=C(S5)/C=C\6/C(=C(C#N)C#N)C7=CC(=C(C=C7C6=O)F)F)C(=C(SCC8=CC=C(C=C8)CCCCCC)SCC9=CC=C(C=C9)CCCCCC)C1=C4SC(=C1)/C=C\1/C(=C(C#N)C#N)C2=CC(=C(C=C2C1=O)F)F)SCC1=CC=C(C=C1)CCCCCC	0.0513831
CC1=CC=C(C=C1)C2(C3=CC4=C(C=C3C5=C2C6=C(S5)C=C(S6)/C=C\7/C(=C(C#N)C#N)C8=CC(=C(C=C8C7=O)F)F)C(C9=C4SC1=C9SC(=C1)/C=C\1/C(=C(C#N)C#N)C2=CC(=C(C=C2C1=O)F)F)(C1=CC=C(C=C1)C)C1=CC=C(C=C1)C)C1=CC=C(C=C1)C	0.0930663
CC1=CC=C(C=C1)C2(C3=C(C4=C2C(=C5C(=C4F)C(C6=C5SC(=C6)/C=C\7/C(=C(C#N)C#N)C8=CC=CC=C8C7=S)(C9=CC=C(C=C9)C)C1=CC=C(C=C1)C)F)SC(=C3)/C=C\1/C(=C(C#N)C#N)C2=CC=CC=C2C1=O)C1=CC=C(C=C1)C	0.086407
CC1=CC=C(C=C1)C2(C3=C(C(=C4C(=C3F)C5=C(C4(C6=CC=C(C=C6)C)C7=CC=C(C=C7)C)C8=C(S5)C=C(S8)/C=C\9/C(=C(C#N)C#N)C1=CC=CC=C1C9=O)F)C1=C2C2=C(S1)C=C(S2)/C=C\1/C(=C(C#N)C#N)C2=CC=CC=C2C1=O)C1=CC=C(C=C1)C	0.0957378
CC1=CC=C(C=C1)C2(C3=C(C4=C2C(=C5C(=C4F)C(C6=C5SC(=C6)C7=CC=C(S7)/C=C\8/C(=C(C#N)C#N)C9=CC=CC=C9C8=O)(C1=CC=C(C=C1)C)C1=CC=C(C=C1)C)F)SC(=C3)C1=CC=C(S1)/C=C\1/C(=C(C#N)C#N)C2=CC=CC=C2C1=O)C1=CC=C(C=C1)C	0.0905319
CC1=C(C2=C(S1)C3=C(C2(C)C)C(=C4C(=C3F)C(C5=C4SC(=C5F)CCCC6(C(=C(C#N)C#N)C7=CC=CC=C7C6=O)C)(C)C)F)F	0.0707444
CC1=C(C2=C(S1)C3=CC4=C(C=C3C2(C)C)C5=C(C4(C)C)C(=C(S5)CCCC6(C(=C(C#N)C#N)C7=CC=CC=C7C6=O)C)F)F	0.074539
CC1=CC2=C(S1)C3=C(C2(C)C)C(=C4C(=C3F)C(C5=C4SC(=C5)CCCC6(C(=C(C#N)C#N)C7=CC=CC=C7C6=O)C)(C)C)F	0.074539
CC1=CC=C(C=C1)C2(C3=C(C(=C4C(=C3F)C5=C(C4(C6=CC=C(C=C6)C)C7=CC=C(C=C7)C)C8=C(S5)C=C(S8)C9=CC=C(S9)/C=C\1/C(=C(C#N)C#N)C3=CC=CC=C3C1=O)F)C1=C2C2=C(S1)C=C(S2)C1=CC=C(S1)/C=C\1/C(=C(C#N)C#N)C2=CC=CC=C2C1=O)C1=CC=C(C=C1)C	0.0973792
CC1=CC2=C(S1)C3=C(S2)C4=C(C3(C)C)C(=C5C(=C4F)C(C6=C5SC7=C6SC(=C7)C/C=C\8/C(=C(C#N)C#N)C9=CC=CC=C9C8=O)(C)C)F	0.0955112
CCCCCCCCC1=CC=C(C=C1)C2(C3=CC4=C(C=C3C5=C2C=C(S5)/C=C\6/C(=C(C#N)C#N)C7=CC(=C(C=C7C6=O)F)F)C(C8=C4SC(=C8)/C=C\9/C(=C(C#N)C#N)C1=CC(=C(C=C1C9=O)F)F)(C1=CC=C(C=C1)CCCCCC)C1=CC=C(C=C1)CCCCCCCC)C1=CC=C(C=C1)CCCCCC	0.0570166
CCCCCCC1=CC=C(C=C1)C2(C3=CC4=C(C=C3C5=C2C6=C(S5)C=C(S6)/C=C\7/C(=C(C#N)C#N)C8=C(C7=O)C(=C(S8)F)F)C(C9=C4SC1=C9SC(=C1)/C=C\1/C(=C(C#N)C#N)C2=C(C1=O)C(=C(S2)F)F)(C1=CC=CC=C1)C1=CC=C(C=C1)CCCCCC)C1=CC=C(C=C1)CCCCCC	0.0728226
CC1=CC=C(C=C1)C2(C3=C(C4=C2C(=C5C(=C4F)C(C6=C5SC(=C6)/C=C\7/C(=C(C#N)C#N)C8=CC=CC=C8C7=S)(C9=CC=C(C=C9)C)C1=CC=C(C=C1)C)F)SC(=C3)/C=C\1/C(=C(\C#N)/[N+]#[C-])/C2=CC=CC=C2C1=O)C1=CC=C(C=C1)C	0.086407
CC1(C2=CC3=C(C=C2C4=C1C5=C(S4)C(=C(S5)C=C6C(=C(C#N)C#N)C7=CC=CC=C7C6=O)F)C(C8=C3SC9=C8SC(=C9F)C=C1C(=C(C#N)C#N)C2=CC=CC=C2C1=O)(C)C)C	0.0880057
CC1(C2=CC3=C(C=C2C4=C1C(=C(S4)/C=C\5/C(=C(C#N)C#N)C6=CC=CC=C6C5=O)F)C(C7=C3SC(=C7F)/C=C\8/C(=C(C#N)C#N)C9=CC=CC=C9C8=O)(C)C)C	0.0752961
CC1(C2=C(C(=C3C(=C2F)C4=C(C3(C)C)C5=C(S4)C(=C(S5)/C=C\6/C(=C(C#N)C#N)C7=CC=CC=C7C6=O)F)F)C8=C1C9=C(S8)C(=C(S9)/C=C\1/C(=C(C#N)C#N)C2=CC=CC=C2C1=O)F)C	0.084655
CC1(C2=CC3=C(C=C2C4=C1C5=C(S4)C(=C(S5)/C=C\6/C(=C(C#N)C#N)C7=CC=CC=C7C6=O)F)C(C8=C3SC9=C8SC(=C9F)/C=C\1/C(=C(C#N)C#N)C2=CC=CC=C2C1=O)(C)C)C	0.0880057
CC1(C2=C(C(=C3C(=C2F)C4=C(C3(C)C)C5=C(S4)C=C(S5)/C=C\6/C(=C(C#N)C#N)C7=CC=CC=C7C6=O)F)C8=C1C9=C(S8)C=C(S9)/C=C\1/C(=C(C#N)C#N)C2=CC=CC=C2C1=O)C	0.0880057
CC1(C2=C(C(=C3C(=C2F)C4=C(C3(C)C)C(=C(S4)/C=C\5/C(=C(C#N)C#N)C6=CC=CC=C6C5=O)F)F)C7=C1C(=C(S7)/C=C\8/C(=C(C#N)C#N)C9=CC=CC=C9C8=O)F)C	0.0720432
CC1(C2=C(C3=C1C(=C4C(=C3F)C(C5=C4SC(=C5)/C=C\6/C(=C(C#N)C#N)C7=CC=CC=C7C6=O)(C)C)F)SC(=C2)/C=C\8/C(=C(C#N)C#N)C9=CC=CC=C9C8=O)C	0.0752961
CSC(=C1C2=CC3=C(C=C2C4=C1C=C(S4)/C=C\5/C(=C(C#N)C#N)C6=CC(=C(C=C6C5=O)F)F)C(=C(SC)SC)C7=C3SC(=C7)/C=C\8/C(=C(C#N)C#N)C9=CC(=C(C=C9C8=O)F)F)SC	0.0585295
CCCCCCC1=CC(=CC(=C1)C2(C3=CC4=C(C=C3C5=C2SC(=C5)/C=C\6/C(=C(\C#N)/[N+]#[C-])/C7=CC(=C(C=C7C6=O)F)F)C(C8=C4C=C(S8)/C=C\9/C(=C(/C#N)\[N+]#[C-])/C1=CC(=C(C=C1C9=O)F)F)(C1=CC(=CC(=C1)CCCCCC)CCCCCC)C1=CC(=CC(=C1)CCCCCC)CCCCCC)C1=CC(=CC(=C1)CCCCCC)CCCCCC)CCCCCC	0.0455703
CCCCCCC1=CC=C(C=C1)C2(C3=CC4=C(C=C3C5=C2C6=C(S5)C=C(S6)/C=C\7/C(=C(C#N)C#N)C8=CC(=C(C=C8C7=O)F)F)C(C9=C4SC1=C9SC(=C1)/C=C\1/C(=C(C#N)C#N)C2=CC(=C(C=C2C1=O)F)F)(C1=CC=C(C=C1)C)C1=CC=C(C=C1)CCCCCC)C1=CC=C(C=C1)CCCCCC	0.0727357
CC1(C2=CC3=C(C=C2C4=C1C(=C(S4)C=C5C(=C(C#N)C#N)C6=CC=CC=C6C5=O)F)C(C7=C3SC(=C7F)C=C8C(=C(C#N)C#N)C9=CC=CC=C9C8=O)(C)C)C	0.0752961
CC1(C2=C(C(=C3C(=C2F)C4=C(C3(C)C)C5=C(S4)C(=C(S5)C=C6C(=C(C#N)C#N)C7=CC=CC=C7C6=O)F)F)C8=C1C9=C(S8)C(=C(S9)C=C1C(=C(C#N)C#N)C2=CC=CC=C2C1=O)F)C	0.084655
CC1(C2=C(C(=C3C(=C2F)C4=C(C3(C)C)C5=C(S4)C=C(S5)C=C6C(=C(C#N)C#N)C7=CC=CC=C7C6=O)F)C8=C1C9=C(S8)C=C(S9)C=C1C(=C(C#N)C#N)C2=CC=CC=C2C1=O)C	0.0880057
CC1(C2=C(C(=C3C(=C2F)C4=C(C3(C)C)C(=C(S4)C=C5C(=C(C#N)C#N)C6=CC=CC=C6C5=O)F)F)C7=C1C(=C(S7)C=C8C(=C(C#N)C#N)C9=CC=CC=C9C8=O)F)C	0.0720432
CC1(C2=C(C3=C1C(=C4C(=C3F)C(C5=C4SC(=C5)C=C6C(=C(C#N)C#N)C7=CC=CC=C7C6=O)(C)C)F)SC(=C2)C=C8C(=C(C#N)C#N)C9=CC=CC=C9C8=O)C	0.0752961
C1CCC2(C3=C(SC(=C3)/C=C/4\C(=O)C5=CC(=C(C=C5C4=C(C#N)C#N)F)F)C6=C2C=C(S6)/C=C/7\C(=O)C8=CC(=C(C=C8C7=C(C#N)C#N)F)F)CC1	0.0660732
CCCCCCC1=CC(=CC(=C1)C2(C3=C(C(=C4C(=C3F)C5=C(C4(C6=CC(=CC(=C6)CCCCCC)CCCCCC)C7=CC(=CC(=C7)CCCCCC)CCCCCC)C8=C(S5)C=C(S8)/C=C\9/C(=C(C#N)C#N)C1=CC(=C(C=C1C9=O)F)F)F)C1=C2C2=C(S1)C=C(S2)/C=C\1/C(=C(C#N)C#N)C2=CC(=C(C=C2C1=O)F)F)C1=CC(=CC(=C1)CCCCCC)CCCCCC)CCCCCC	0.0512257
CC1=CC2=C(C=C1F)C(=O)/C(=C\C3=CC4=C(S3)C5=C(C46CCC(CC6)(C)C)C=C(S5)/C=C\7/C(=C(\C#N)/[N+]#[C-])/C8=CC(=C(C=C8C7=O)F)F)/C2=C(C#N)[N+]#[C-]	0.0640347
CC.CC(F)(F)F.C#CC(=C\1C2=CC=CC=C2C(=O)/C1=C\C3=CC4=C(S3)C5=C(C46CCCCC6)C=C(S5)/C=C\7/C(=C(C#N)C#N)C8=CC=CC=C8C7=O)C#N	0.0626647
CC1=CC2=C(C=C1F)C(=O)/C(=C\C3=CC4=C(S3)C5=C(C46CCCC6)C=C(S5)/C=C\7/C(=C(\C#N)/[N+]#[C-])/C8=CC(=C(C=C8C7=O)F)F)/C2=C(C#N)[N+]#[C-]	0.0676823
CC(F)(F)F.CC(F)(F)F.C1CCC2(C3=C(SC(=C3)/C=C/4\C(=O)C5=CC=CC=C5C4=C(C#N)C#N)C6=C2C=C(S6)/C=C/7\C(=O)C8=CC=CC=C8C7=C(C#N)C#N)CC1	0.0586265
C[C@H]1CC2(C[C@@H]1C)C3=C(C4=C2C=C(S4)/C=C\5/C(=C(C#N)[N+]#[C-])C6=C(C5=O)C=C(C(=C6)C)F)SC(=C3)/C=C\7/C(=C(\C#N)/[N+]#[C-])/C8=CC(=C(C=C8C7=O)F)F	0.0652061
CC1=CC=C(C=C1)C2(C3=CC4=C(C=C3C5=C2C=C(S5)/C=C\6/C(=C(C#N)C#N)C7=CC(=C(C=C7C6=O)F)F)C(C8=C4SC(=C8)/C=C\9/C(=C(\C#N)/[N+]#[C-])/C1=CC(=C(C=C1C9=O)F)F)(C1=CC=C(C=C1)C)C1=CC=C(C=C1)C)C1=CC=C(C=C1)C	0.0849455
CC1(CCC2(C3=C(SC(=C3)/C=C/4\C(=O)C5=CC(=C(C=C5C4=C(C#N)C#N)F)F)C6=C2C=C(S6)/C=C/7\C(=O)C8=CC(=C(C=C8C7=C(C#N)C#N)F)F)CC1)C	0.0637113
CC1=CC=C(C=C1)C2(C3=CC4=C(C=C3C5=C2C=C(S5)/C=C\6/C(=C(C#N)C#N)C7=CC(=C(C=C7C6=O)F)F)C(C8=C4SC(=C8)/C=C\9/C(=C(C#N)C#N)C1=CC(=C(C=C1C9=O)F)F)(C1=CC=C(C=C1)C)C1=CC=C(C=C1)C)C1=CC=C(C=C1)C	0.0849455
CCCCCCC1=CC(=CC(=C1)C2(C3=CC4=C(C=C3C5=C2SC(=C5)/C=C\6/C(=C(C#N)C#N)C7=CC(=C(C=C7C6=O)F)F)C(C8=C4C=C(S8)/C=C\9/C(=C(C#N)C#N)C1=CC(=C(C=C1C9=O)F)F)(C1=CC(=CC(=C1)CCCCCC)CCCCCC)C1=CC(=CC(=C1)CCCCCC)CCCCCC)C1=CC(=CC(=C1)CCCCCC)CCCCCC)CCCCCC	0.0455703
CCCCC(CC)CC1(C2=C(C3=C1C=C(S3)C4=CC(=C(C=C4F)C5=CC6=C(S5)C7=C(C6(CC(CC)CCCC)CC(CC)CCCC)C=C(S7)/C=C\8/C(=C(C#N)C#N)C9=CC=CC=C9C8=O)F)SC(=C2)/C=C\1/C(=C(C#N)C#N)C2=CC=CC=C2C1=O)CC(CC)CCCC	0.0495705
CCCCCCC1=CC=C(C=C1)C2(C3=CC4=C(C=C3C5=C2C=C(S5)/C=C/6\C=C/C(=C\7/C=C/C(=C\8/C(=C(\C#N)/[N+]#[C-])/C9=CC(=C(C=C9C8=O)F)F)/S7)/S6)C(C1=C4SC(=C1)/C=C/1\C=C/C(=C\2/C=C/C(=C\3/C(=C(/C#N)\[N+]#[C-])/C4=CC(=C(C=C4C3=O)F)F)/S2)/S1)(C1=CC=C(C=C1)CCCCCC)C1=CC=C(C=C1)CCCCCC)C1=CC=C(C=C1)CCCCCC	0.0704837
CCCCCCC1=CC=C(C=C1)C2(C3=CC4=C(C=C3C5=C2C=C(S5)/C=C/6\C=C/C(=C\7/C(=C(\C#N)/[N+]#[C-])/C8=CC(=C(C=C8C7=O)F)F)/S6)C(C9=C4SC(=C9)/C=C/1\C=C/C(=C\2/C(=C(/C#N)\[N+]#[C-])/C3=CC(=C(C=C3C2=O)F)F)/S1)(C1=CC=C(C=C1)CCCCCC)C1=CC=C(C=C1)CCCCCC)C1=CC=C(C=C1)CCCCCC	0.065861
CCCCCCC1=CC=C(C=C1)C2(C3=CC4=C(C=C3C5=C2C=C(S5)/C=C/6\C=C7C(=C/C(=C\8/C(=C(\C#N)/[N+]#[C-])/C9=CC(=C(C=C9C8=O)F)F)/S7)S6)C(C1=C4SC(=C1)/C=C/1\C=C2C(=C/C(=C\3/C(=C(/C#N)\[N+]#[C-])/C4=CC(=C(C=C4C3=O)F)F)/S2)S1)(C1=CC=C(C=C1)CCCCCC)C1=CC=C(C=C1)CCCCCC)C1=CC=C(C=C1)CCCCCC	0.0723814
CCCCCCC1=CC=C(C=C1)C2(C3=CC4=C(C=C3C5=C2C6=C(S5)C=C(S6)/C=C\7/C(=C(C#N)C#N)C8=CC=CC=C8C7=O)C(C9=C4SC1=C9SC(=C1)C=C1C(=C(C#N)C#N)C2=CC=CC=C2C1=O)(C1=CC=C(C=C1)CCCCCC)C1=CC=C(C=C1)CCCCCC)C1=CC=C(C=C1)CCCCCC	0.070672
CCCCCCC1=CC=C(S1)C2(C3=CC4=C(C=C3C5=C2C6=C(S5)C=C(S6)/C=C\7/C(=C(C#N)C#N)C8=CC=CC=C8C7=O)C(C9=C4SC1=C9SC(=C1)/C=C\1/C(=C(C#N)C#N)C2=CC=CC=C2C1=O)(C1=CC=C(S1)CCCCCC)C1=CC=C(S1)CCCCCC)C1=CC=C(S1)CCCCCC	0.0696824
CCCCCCC1=CC=C(C=C1)C2(C3=CC4=C(C=C3C5=C2C6=C(S5)C=C(S6)C=C7C(=C(C#N)C#N)C8=CC=CC=C8C7=O)C(C9=C4SC1=C9SC(=C1)C=C1C(=C(C#N)C#N)C2=CC=CC=C2C1=O)(C1=CC=C(C=C1)CCCCCC)C1=CC=C(C=C1)CCCCCC)C1=CC=C(C=C1)CCCCCC	0.070672
CCCCCCC1=CC=C(C=C1)C2(C3=CC4=C(C=C3C5=C2C6=C(S5)C=C(S6)/C=C/7\C(=C(C#N)C#N)C8=CC=CC=C8C7=O)C(C9=C4SC1=C9SC(=C1)/C=C\1/C(=C(C#N)C#N)C2=CC=CC=C2C1=O)(C1=CC=C(C=C1)CCCCCC)C1=CC=C(C=C1)CCCCCC)C1=CC=C(C=C1)CCCCCC	0.070672
CCCCCCCCCCCCCCCCC1(C2=CC3=C(C=C2C4=C1C=C(S4)/C=C\5/C(=C(C#N)C#N)C6=CC=CC=C6C5=O)C(C7=C3SC(=C7)/C=C\8/C(=C(C#N)C#N)C9=CC=CC=C9C8=O)(CCCCCCCCCCCCCCCC)CCCCCCCCCCCCCCCC)CCCCCCCCCCCCCCCC	0.0272418
CCCCCCC1=CC=C(C=C1)C2(C3=CC4=C(C=C3C5=C2C6=C(S5)C=C(S6)C=C7C(=C(C#N)C#N)C8=C(C7=O)C=CC(=C8)C)C(C9=C4SC1=C9SC(=C1)C=C1C(=C(C#N)C#N)C2=C(C1=O)C=CC(=C2)C)(C1=CC=C(C=C1)CCCCCC)C1=CC=C(C=C1)CCCCCC)C1=CC=C(C=C1)CCCCCC	0.0695234
CCCCCCC1=CC=C(S1)C2(C3=CC4=C(C=C3C5=C2C6=C(S5)C=C(S6)C=C7C(=C(C#N)C#N)C8=CC=CC=C8C7=O)C(C9=C4SC1=C9SC(=C1)C=C1C(=C(C#N)C#N)C2=CC=CC=C2C1=O)(C1=CC=C(S1)CCCCCC)C1=CC=C(S1)CCCCCC)C1=CC=C(S1)CCCCCC	0.0696824
CCCCCCC1=CC=C(C=C1)C2(C3=CC4=C(C=C3C5=C2C6=C(S5)C=C(S6)/C=C/7\C(=C(C#N)C#N)C8=CC=CC=C8C7=O)C(C9=C4SC1=C9SC(=C1)/C=C/1\C(=C(C#N)C#N)C2=CC=CC=C2C1=O)(C1=CC=C(C=C1)CCCCCC)C1=CC=C(C=C1)CCCCCC)C1=CC=C(C=C1)CCCCCC	0.070672
CCCCCCC1=CC=C(C=C1)C2(C3=CC4=C(C=C3C5=C2C6=C(S5)C=C(S6)/C=C\7/C(=C(C#N)C#N)C8=C(C7=O)C=CC(=C8)C)C(C9=C4SC1=C9SC(=C1)/C=C\1/C(=C(C#N)C#N)C2=C(C1=O)C=CC(=C2)C)(C1=CC=C(C=C1)CCCCCC)C1=CC=C(C=C1)CCCCCC)C1=CC=C(C=C1)CCCCCC	0.0695234
CCCCCCC1=CC=C(C=C1)C2(C3=CC4=C(C=C3C5=C2C6=C(S5)C7=C(S6)C=C(S7)/C=C\8/C(=C(C#N)C#N)C9=C(C8=O)C(=CC=C9)F)C(C1=C4SC2=C1SC1=C2SC(=C1)/C=C\1/C(=C(C#N)C#N)C2=C(C1=O)C(=CC=C2)F)(C1=CC=C(C=C1)CCCCCC)C1=CC=C(C=C1)CCCCCC)C1=CC=C(C=C1)CCCCCC	0.0758338
CCCCCCC1=CC=C(C=C1)C2(C3=CC4=C(C=C3C5=C2C6=C(S5)C7=C(S6)C=C(S7)/C=C\8/C(=C(C#N)C#N)C9=C(C8=O)C=C(C=C9)F)C(C1=C4SC2=C1SC1=C2SC(=C1)/C=C\1/C(=C(C#N)C#N)C2=C(C1=O)C=C(C=C2)F)(C1=CC=C(C=C1)CCCCCC)C1=CC=C(C=C1)CCCCCC)C1=CC=C(C=C1)CCCCCC	0.0758338
CCCCCCC1=CC=C(C=C1)C2(C3=CC4=C(C=C3C5=C2C6=C(S5)C7=C(S6)C=C(S7)/C=C\8/C(=C(C#N)C#N)C9=CC(=C(C=C9C8=O)F)F)C(C1=C4SC2=C1SC1=C2SC(=C1)/C=C\1/C(=C(C#N)C#N)C2=CC(=C(C=C2C1=O)F)F)(C1=CC=C(C=C1)CCCCCC)C1=CC=C(C=C1)CCCCCC)C1=CC=C(C=C1)CCCCCC	0.0743841
CCCCCCC1(C2=CC3=C(C=C2C4=C1C=C(S4)/C=C\5/C(=C(C#N)C#N)C6=CC(=C(C=C6C5=O)F)F)C(C7=C3SC(=C7)/C=C\8/C(=C(C#N)C#N)C9=CC(=C(C=C9C8=O)F)F)(CCCCCC)CCCCCC)CCCCCC	0.0456839
CCCCCCC1=CC=C(C=C1)C2(C3=CC4=C(C=C3C5=C2C6=C(S5)C=C(S6)/C=C\7/C(=C(C#N)C#N)C8=C(C7=O)C=C(C=C8)F)C(C9=C4SC1=C9SC(=C1)/C=C\1/C(=C(C#N)C#N)C2=C(C1=O)C=C(C=C2)F)(C1=CC=C(C=C1)CCCCCC)C1=CC=C(C=C1)CCCCCC)C1=CC=C(C=C1)CCCCCC	0.0692056
CCCCCCC1=CC=C(C=C1)C2(C3=C(C4=C(C5=C(C(=C42)F)C6=C(C5(C7=CC=C(C=C7)C)C8=CC=C(C=C8)C)C=C(S6)/C=C\9/C(=C(C#N)C#N)C1=CC=CC=C1C9=O)F)SC(=C3)/C=C\1/C(=C(C#N)C#N)C2=CC=CC=C2C1=O)C1=CC=C(C=C1)C	0.0792782
CC1=CC=C(C=C1)C2(C3=C(C4=C2C(=C5C(=C4F)C(C6=C5SC(=C6)/C=C\7/C(=C(C#N)C#N)C8=CC=CC=C8C7=O)(C9=CC=C(C=C9)C)C1=CC=C(C=C1)C)F)SC(=C3)/C=C\1/C(=C(C#N)C#N)C2=CC=CC=C2C1=O)C1=CC=C(C=C1)C	0.0876235
CC1=CC2=C(C=C1F)C(=O)/C(=C\C3=CC4=C(S3)C5=C(C46CCCCC6)C=C(S5)/C=C\7/C(=C(\C#N)/[N+]#[C-])/C8=CC(=C(C=C8C7=O)F)F)/C2=C(C#N)[N+]#[C-]	0.0664211
CC1=CC2=C(C=C1F)C(=O)/C(=C\C3=CC4=C(S3)C5=C(C46CCCCC6)C=C(S5)/C=C\7/C(=C(C#N)C#N)C8=CC(=C(C=C8C7=O)F)F)/C2=C(C#N)C#N	0.0664211
CCC1(C2=C(C3=C1C=C(S3)/C=C\4/C(=C(C#N)[N+]#[C-])C5=C(C4=O)C=C(C(=C5)C)F)SC(=C2)/C=C\6/C(=C(\C#N)/[N+]#[C-])/C7=CC(=C(C=C7C6=O)F)F)CC	0.0657236
CCC1(C2=C(C3=C1C=C(S3)/C=C\4/C(=C(C#N)C#N)C5=C(C4=O)C=C(C(=C5)C)F)SC(=C2)/C=C\6/C(=C(C#N)C#N)C7=CC(=C(C=C7C6=O)F)F)CC	0.0657236
CC1=CC2=C(C=C1F)C(=O)/C(=C\C3=CC4=C(S3)C5=C(C46CCCCC6)C=C(S5)C=C7C(=O)C8=CC(=C(C=C8C7=O)F)F)/C2=C(C#N)C#N	0.0709497
CC1=CC2=C(C=C1F)C(=O)/C(=C\C3=CC4=C(S3)C5=C(C46CCCC6)C=C(S5)/C=C\7/C(=C(C#N)C#N)C8=CC(=C(C=C8C7=O)F)F)/C2=C(C#N)C#N	0.0676823
CC1=CC2=C(C=C1F)C(=O)/C(=C\C3=CC4=C(S3)C5=C(C46CCC(CC6)(C)C)C=C(S5)/C=C\7/C(=C(C#N)C#N)C8=CC(=C(C=C8C7=O)F)F)/C2=C(C#N)C#N	0.0640347
CCC1(C2=C(C3=C1C=C(S3)C=C4C(=O)C5=CC(=C(C=C5C4=O)F)F)SC(=C2)/C=C\6/C(=C(C#N)C#N)C7=C(C6=O)C=C(C(=C7)C)F)CC	0.0701544
CC1=CC=C(C=C1)C2(C3=CC4=C(C=C3C5=C2C=C(S5)/C=C\6/C(=C(C#N)C#N)C7=CC(=C(C=C7C6=O)F)F)C(C8=C4SC(=C8)/C=C\9/C(=C(C#N)[N+]#[C-])C1=CC(=C(C=C1C9=O)F)F)(C1=CC=C(C=C1)C)C1=CC=C(C=C1)C)C1=CC=C(C=C1)C	0.0849455
CCCCCCC1=CC=C(C=C1)C2(C3=CC4=C(C=C3C5=C2C=C(S5)/C=C\6/C(=C(C#N)C#N)C7=C(C6=O)C=CC(=C7)F)C(C8=C4SC(=C8)/C=C\9/C(=C(C#N)C#N)C1=C(C9=O)C=CC(=C1)F)(C1=CC=C(C=C1)CCCCCC)C1=CC=C(C=C1)CCCCCC)C1=CC=C(C=C1)CCCCCC	0.0616604
CCCCCCC1=CC=C(C=C1)C2(C3=CC4=C(C=C3C5=C2C6=C(S5)C=C(S6)/C=C\7/C(=C(C#N)C#N)C8=C(C7=O)C=CC(=C8)C(F)(F)F)C(C9=C4SC1=C9SC(=C1)/C=C\1/C(=C(C#N)C#N)C2=C(C1=O)C=CC(=C2)C(F)(F)F)(C1=CC=C(C=C1)CCCCCC)C1=CC=C(C=C1)CCCCCC)C1=CC=C(C=C1)CCCCCC	0.0654315
CC1=CC=C(C=C1)C2(C3=CC4=C(C=C3C5=C2C6=C(S5)C7=C(S6)C=C(S7)/C=C\8/C(=C(C#N)C#N)C9=CC(=C(C=C9C8=O)F)F)C(C1=C4SC2=C1SC1=C2SC(=C1)/C=C\1/C(=C(C#N)C#N)C2=CC(=C(C=C2C1=O)F)F)(C1=CC=C(C=C1)C)C1=CC=C(C=C1)C)C1=CC=C(C=C1)C	0.0998871
CCCCCCC1=CC=C(C=C1)C2(C3=CC4=C(C=C3C5=C2C=C(S5)/C=C\6/C(=C(C#N)C#N)C7=CC(=C(C=C7C6=O)F)F)C(C8=C4SC(=C8)/C=C\9/C(=C(C#N)C#N)C1=CC(=C(C=C1C9=O)F)F)(C1=CC=C(C=C1)CCCCCC)C1=CC=C(C=C1)CCCCCC)C1=CC=C(C=C1)CCCCCC	0.0603221
CCCCCCC1=CC=C(C=C1)C2(C3=CC4=C(C=C3C5=C2C6=C(S5)C=C(S6)C=C7C(=C(C#N)C#N)C8=C(C7=O)C=C(C=C8)F)C(C9=C4SC1=C9SC(=C1)C=C1C(=C(C#N)C#N)C2=C(C1=O)C=C(C=C2)F)(C1=CC=C(C=C1)CCCCCC)C1=CC=C(C=C1)CCCCCC)C1=CC=C(C=C1)CCCCCC	0.0692056
CCCCCCC1=CC=C(C=C1)C2=CC3=C(S2)C4=CC5=C(C=C4C3=O)C6=C(C5=O)C=C(S6)C7=CC=C(C=C7)CCCCCC	0.1074
CCCCCCCCC1(C2=C(C3=C1C=C(C=C3)C4=CC=C(S4)/C=C/5\C(=O)C6=CC=CC=C6C5=C(C#N)C#N)C=CC(=C2)C7=CC=C(S7)/C=C/8\C(=O)C9=CC=CC=C9C8=C(C#N)C#N)CCCCCCCC	0.0606962
CCCCCCC1=CC=C(C=C1)C2(C3=CC4=C(C=C3C5=C2C=C(S5)C6=CC=C(S6)/C=C\7/C(=C(C#N)C#N)C8=CC=CC=C8C7=O)C(C9=C4SC(=C9)C1=CC=C(S1)/C=C\1/C(=C(C#N)C#N)C2=CC=CC=C2C1=O)(C1=CC=C(C=C1)CCCCCC)C1=CC=C(C=C1)CCCCCC)C1=CC=C(C=C1)CCCCCC	0.0677943
CCCCCCC1=CC=C(C=C1)C2(C3=CC4=C(C=C3C5=C2C=C(S5)C6=C(C=C(S6)/C=C\7/C(=C(C#N)C#N)C8=CC=CC=C8C7=O)CC(CC)CCCC)C(C9=C4SC(=C9)C1=C(C=C(S1)/C=C\1/C(=C(C#N)C#N)C2=CC=CC=C2C1=O)CC(CC)CCCC)(C1=CC=C(C=C1)CCCCCC)C1=CC=C(C=C1)CCCCCC)C1=CC=C(C=C1)CCCCCC	0.0567512
CCCCCCCCC1(C2=C(C=CC(=C2)C3=CC=C(S3)C=C4C(=C(C#N)C#N)C5=CC=CC=C5C4=O)C6=C1C=C(C=C6)C7=CC=C(S7)C=C8C(=C(C#N)C#N)C9=CC=CC=C9C8=O)CCCCCCCC	0.0606962
CCCCCCCCC1(C2=CC3=C(C=C2C4=C1C=C(C=C4)C5=CC=C(S5)/C=C\6/C(=C(C#N)C#N)C7=CC=CC=C7C6=O)C(C8=C3C=CC(=C8)C9=CC=C(S9)/C=C\1/C(=C(C#N)C#N)C2=CC=CC=C2C1=O)(CCCCCCCC)CCCCCCCC)CCCCCCCC	0.0498186
CCCCCCC1(C2=CC3=C(C=C2C4=C1C=C(S4)/C=C\5/C(=C(C#N)C#N)C6=CC=CC=C6C5=O)C(C7=C3SC(=C7)/C=C\8/C(=C(C#N)C#N)C9=C(C8=O)CCC=C9)(CCCCCC)CCCCCC)CCCCCC	0.0402114
CC1=CC=C(C=C1)C2(C3=CC4=C(C=C3C5=C2C6=C(S5)C=C(C=C6)C/C=C\7/C(=C(C#N)C#N)C8=CC=CC=C8C7=O)C(C9=C4SC(=C9SC)C)(C1=CC=C(C=C1)C)C1=CC=C(C=C1)C)C1=CC=C(C=C1)C	0.0965917
CC1=CC=C(C=C1)C2(C3=CC4=C(C=C3C5=C2C6=C(S5)C7=C(S6)C=C(S7)C8=CC=CS8)C(C9=C4SC(=C9)C1=CC=C(S1)/C=C\1/C(=C(C#N)C#N)C2=CC=CC=C2C1=O)(C1=CC=C(C=C1)C)C1=CC=C(C=C1)C)C1=CC=C(C=C1)C	0.109473
CC1=CC=C(C=C1)C2(C3=CC4=C(C=C3C5=C2C6=C(S5)C=C(S6)/C=C\7/C(=C(C#N)C#N)C8=CC=CC=C8C7=O)C(C9=C4SC1=C9SC(=C1)/C=C\1/C(=C(C#N)C#N)C2=CC=CC=C2C1=O)(C1=CC=C(C=C1)C)C1=CC=C(C=C1)C)C1=CC=C(C=C1)C	0.0985672
CC1(C2=C(SC3=C2SC4=C3C(C5=C4SC6=C5SC(=C6)C7=CC=C(S7)/C=C/8\C(=O)C9=CC=CC=C9C8=C(C#N)C#N)(C)C)C2=C1C1=C(S2)C=C(S1)C1=CC=C(S1)/C=C/1\C(=O)C2=CC=CC=C2C1=C(C#N)C#N)C	0.0982648
CCCCCCC1=CC(=CC=C1)C2(C3=C(SC4=C3SC5=C4C(C6=C5C=CC(=C6)C7=CC=C(S7)/C=C/8\C(=O)C9=CC=CC=C9C8=C(C#N)C#N)(C1=CC=CC(=C1)CCCCCC)C1=CC=CC(=C1)C)C1=C2C=C(C=C1)C1=CC=C(S1)/C=C/1\C(=O)C2=CC=CC=C2C1=C(C#N)C#N)C1=CC=CC(=C1)C	0.0822863
CC1=CC=C(C=C1)C2(C3=C(SC4=C3SC5=C4C(C6=C5SC(=C6)/C=C/7\C(=O)C8=CC=CC=C8C7=C(C#N)C#N)(C9=CC=C(C=C9)C)C1=CC=C(C=C1)C)C1=C2C=C(S1)/C=C/1\C(=O)C2=CC=CC=C2C1=C(C#N)C#N)C1=CC=C(C=C1)C	0.0942278
CCCCCCC1=CC(=CC(=C1)C2(C3=C(SC4=C3SC5=C4C(C6=C5C=CC(=C6)C7=CC=C(S7)/C=C/8\C(=O)C9=CC=CC=C9C8=C(C#N)C#N)(C1=CC(=CC(=C1)CCCCCC)CCCCCC)C1=CC(=CC(=C1)CCCCCC)CCCCCC)C1=C2C=C(C=C1)C1=CC=C(S1)/C=C/1\C(=O)C2=CC=CC=C2C1=C(C#N)C#N)C1=CC(=CC(=C1)CCCCCC)CCCCCC)CCCCCC	0.0551603
CCCCCCC1=CC=C(C=C1)C2(C3=CC4=C(C=C3C5=C2C6=C(S5)C=C(S6)/C=C\7/C(=C(C#N)C#N)C8=CC=CC=C8C7=O)C(C9=C4SC(=C9)/C=C\1/C(=C(C#N)C#N)C2=CC=CC=C2C1=O)(C1=CC=C(C=C1)C)C1=CC=C(C=C1)CCCCCC)C1=CC=C(C=C1)C	0.0784803
CC1=CC=C(C=C1)C2(C3=C(C=CC(=C3)C4=CC=C(S4)/C=C\5/C(=C(/CN=C)\C#N)/C6=CC=CC=C6C5=O)C7=C2C8=C(S7)C9=C(C8(C1=CC=C(C=C1)C)C1=CC=C(C=C1)C)C=C(C=C9)C1=CC=C(S1)/C=C\1/C(=C(C#N)C#N)C2=CC=CC=C2C1=O)C1=CC=C(C=C1)C	0.0909412
CCCCCCCCC1=CC=C(C=C1)C2(C3=C(SC4=C3SC5=C4C(C6=C5SC(=C6)C7=CC=C(S7)/C=C/8\C(=O)C9=CC=CC=C9C8=C(C#N)C#N)(C1=CC=C(C=C1)CCCCCCCC)C1=CC=C(C=C1)C)C1=C2C=C(S1)C1=CC=C(S1)/C=C/1\C(=O)C2=CC=CC=C2C1=C(C#N)C#N)C1=CC=C(C=C1)C	0.0770135
CC1=CC=C(C=C1)C2(C3=C(SC4=C3SC5=C4C(C6=C5SC(=C6)C7=CC=C(S7)/C=C/8\C(=O)C9=CC=CC=C9C8=C(C#N)C#N)(C1=CC=C(C=C1)C)C1=CC=C(C=C1)C)C1=C2C=C(S1)C1=CC=C(S1)/C=C/1\C(=O)C2=CC=CC=C2C1=C(C#N)C#N)C1=CC=C(C=C1)C	0.0961796
CCCCCCC1=CC=C(C=C1)C2(C3=C(C=CC(=C3)C4=CC=C(S4)/C=C\5/C(=C(C#N)C#N)C6=CC=CC=C6C5=O)C7=C2C8=C(S7)C9=C(C8(C1=CC=C(C=C1)CCCCCC)C1=CC=C(C=C1)CCCCCC)C=C(C=C9)C1=CC=C(S1)/C=C\1/C(=C(C#N)C#N)C2=CC=CC=C2C1=O)C1=CC=C(C=C1)C	0.0729973
CCCCCCC1=CC(=CC=C1)C2(C3=C(C=CC(=C3)C4=CC=C(S4)/C=C\5/C(=C(C#N)C#N)C6=CC=CC=C6C5=O)C7=C2C8=C(S7)C9=C(S8)C1=C(C9(C2=CC=CC(=C2)CCCCCC)C2=CC=CC(=C2)CCCCCC)C=C(C=C1)C1=CC=C(S1)/C=C\1/C(=C(C#N)C#N)C2=CC=CC=C2C1=O)C1=CC=CC(=C1)C	0.0764713
CC1(C2=CC3=C(C=C2C4=C1C=C(C=C4)C5=CC=C(S5)/C=C\6/C(=C(C#N)C#N)C7=CC=CC=C7C6=O)C(C8=C3C=CC(=C8)C9=CC=C(S9)/C=C\1/C(=C(C#N)C#N)C2=CC=CC=C2C1=O)(C)C)C	0.0857385
CCCCCCC1=CC=C(C=C1)C2(C3=C(C=CC(=C3)C4=CC=C(S4)/C=C\5/C(=C(C#N)C#N)C6=CC=CC=C6C5=O)C7=C2C8=C(S7)C=C(S8)/C=C\9/C(=C(C#N)C#N)C1=CC=CC=C1C9=O)C1=CC=C(C=C1)C	0.0833929
CCCCCCC1=CC=C(C=C1)C2(C3=C(C=CC(=C3)C4=CC=C(S4)/C=C\5/C(=C(C#N)C#N)C6=CC=CC=C6C5=O)C7=C2C8=C(S7)C=C(S8)/C=C\9/C(=C(C#N)C#N)C1=CC=CC=C1C9=O)C1=CC=C(C=C1)CCCCCC	0.0750398
CCCCCCC1=CC=C(C=C1)C2(C3=C(C4=C2C5=C(S4)C=C(S5)/C=C\6/C(=C(C#N)C#N)C7=CC=CC=C7C6=O)SC(=C3)/C=C\8/C(=C(C#N)C#N)C9=CC=CC=C9C8=O)C1=CC=C(C=C1)CCCCCC	0.0718606
CCCCC(CC)CSC(=C1C2=CC3=C(C=C2C4=C1C=C(S4)/C=C\5/C(=C(C#N)C#N)C6=CC=CC=C6C5=O)C(=C(SCC(CC)CCCC)SCC(CC)CCCC)C7=C3SC(=C7)/C=C\8/C(=C(C#N)C#N)C9=CC=CC=C9C8=O)SCC(CC)CCCC	0.0378329
CCCCCCC1=CC=C(S1)CSC(=C2C3C=C(SC3(C4=C2C=C5C(=C4)/C(=C(\SCC6=CC=C(S6)CCCCCC)/SC7=CC=C(S7)CCCCCC)/C8=C5SC(C8)/C=C\9/C(=C(C#N)C#N)C1=CC=CC=C1C9=O)C)/C=C\1/C(=C(C#N)C#N)C2=CC=CC=C2C1=O)SCC1=CC=C(S1)CCCCCC	0.0422754
CCCCCCC1CCC(S1)SC(=C2C3CC(SC3C4=C2C=C5C6C(C=C(S6)/C=C\7/C(=C(C#N)C#N)C8=CC=CC=C8C7=O)/C(=C(\SC9CCC(S9)CCCCCC)/SC1=CC=C(S1)CCCCCC)/C5=C4)/C=C\1/C(=C(C#N)C#N)C2=CC=CC=C2C1=O)SC1CCC(S1)CCCCCC	0.0274672
CC(C)CCCC(C)CCSC(=C1C2=CC3=C(C=C2C4=C1C=C(S4)/C=C\5/C(=C(C#N)C#N)C6=CC=CC=C6C5=O)C(=C(SCCC(C)CCCC(C)C)SCCC(C)CCCC(C)C)C7=C3SC(=C7)/C=C\8/C(=C(C#N)C#N)C9=CC=CC=C9C8=O)SCCC(C)CCCC(C)C	0.0345197
CC1(C2=CC3=C(C=C2C4=C1C5=C(S4)C=C(S5)/C=C\6/C(=C(C#N)C#N)C7=CC=CC=C7C6=O)C(C8=C3SC9=C8SC(=C9)/C=C\1/C(=C(C#N)C#N)C2=CC=CC=C2C1=O)(C)C)C	0.0916326
CC1=CC=C(C=C1)C2(C3=CC4=C(C=C3C5=C2C6=C(S5)C=C(S6)/C=C\7/C(=C(C#N)C#N)C8=CC=CC=C8C7=O)C(C9=C4SC(=C9)/C=C\1/C(=C(C#N)C#N)C2=CC=CC=C2C1=O)(C1=CC=C(C=C1)C)C1=CC=C(C=C1)C)C1=CC=C(C=C1)C	0.0947169
CC1=CC=C(C=C1)C2(C3=CC4=C(C=C3C5=C2C6=C(S5)C=C(S6)/C=C\7/C(=C(C#N)C#N)C8=CC=CC=C8C7=O)C(C9=C4SC1=C9SC2=C1SC(=C2)/C=C\1/C(=C(C#N)C#N)C2=CC=CC=C2C1=O)(C1=CC=C(C=C1)C)C1=CC=C(C=C1)C)C1=CC=C(C=C1)C	0.102078
CC1=CC=C(C=C1)C2(C3=CC4=C(C=C3C5=C2C6=C(S5)C=C(S6)C7=CC=C(S7)/C=C\8/C(=C(C#N)C#N)C9=CC=CC=C9C8=O)C(C1=C4SC2=C1SC1=C2SC(=C1)C1=CC=C(S1)/C=C\1/C(=C(C#N)C#N)C2=CC=CC=C2C1=O)(C1=CC=C(C=C1)C)C1=CC=C(C=C1)C)C1=CC=C(C=C1)C	0.102896
CC1=CC=C(C=C1)C2(C3=CC4=C(C=C3C5=C2C6=C(S5)C7=C(S6)C=C(S7)C8=CC=C(S8)/C=C\9/C(=C(C#N)C#N)C1=CC=CC=C1C9=O)C(C1=C4SC(=C1)C1=CC=C(S1)/C=C\1/C(=C(C#N)C#N)C2=CC=CC=C2C1=O)(C1=CC=C(C=C1)C)C1=CC=C(C=C1)C)C1=CC=C(C=C1)C	0.0998789
CC1=CC=C(C=C1)C2(C3=CC4=C(C=C3C5=C2C6=C(S5)C=C(C=C6)/C=C\7/C(=C(C#N)C#N)C8=CC=CC=C8C7=O)C(C9=C4SC1=C9SC2=C1SC(=C2)/C=C\1/C(=C(C#N)C#N)C2=CC=CC=C2C1=O)(C1=CC=C(C=C1)C)C1=CC=C(C=C1)C)C1=CC=C(C=C1)C	0.102564
CC1=CC=C(C=C1)C2(C3=CC4=C(C=C3C5=C2C6=C(S5)C=C(C=C6)/C=C\7/C(=C(C#N)C#N)C8=CC=CC=C8C7=O)C(C9=C4SC(=C9)/C=C\1/C(=C(C#N)C#N)C2=CC=CC=C2C1=O)(C1=CC=C(C=C1)C)C1=CC=C(C=C1)C)C1=CC=C(C=C1)C	0.0952112
CC1=CC=C(C=C1)C2(C3=CC4=C(C=C3C5=C2C6=C(S5)C=C(C=C6)C7=CC=C(S7)/C=C\8/C(=C(C#N)C#N)C9=CC=CC=C9C8=O)C(C1=C4SC(=C1)C1=CC=C(S1)/C=C\1/C(=C(C#N)C#N)C2=CC=CC=C2C1=O)(C1=CC=C(C=C1)C)C1=CC=C(C=C1)C)C1=CC=C(C=C1)C	0.0970453
CC1=CC=C(C=C1)C2(C3=CC4=C(C=C3C5=C2C6=C(S5)C=C(S6)C7=CC=C(S7)/C=C\8/C(=C(C#N)C#N)C9=CC=CC=C9C8=O)C(C1=C4SC(=C1)C1=CC=C(S1)/C=C\1/C(=C(C#N)C#N)C2=CC=CC=C2C1=O)(C1=CC=C(C=C1)C)C1=CC=C(C=C1)C)C1=CC=C(C=C1)C	0.0966105
CCCCCCC1=CC=C(C=C1)C2(C3=C(SC4=C3SC5=C4C(C6=C5SC7=C6SC(=C7)/C=C/8\C(=O)C9=C(C8=C(C#N)C#N)C=CC(=C9)C)(C1=CC=C(C=C1)CCCCCC)C1=CC=C(C=C1)CCCCCC)C1=C2C2=C(S1)C=C(S2)/C=C/1\C(=O)C2=C(C1=C(C#N)C#N)C=CC(=C2)C)C1=CC=C(C=C1)CCCCCC	0.0727006
CCCCCCC1=CC=C(C=C1)C2(C3=C(SC4=C3SC5=C4C(C6=C5SC7=C6SC(=C7)/C=C/8\C(=O)C9=CC=CC=C9C8=C(C#N)C#N)(C1=CC=C(C=C1)CCCCCC)C1=CC=C(C=C1)CCCCCC)C1=C2C2=C(S1)C=C(S2)/C=C/1\C(=O)C2=CC=CC=C2C1=C(C#N)C#N)C1=CC=C(C=C1)CCCCCC	0.0738594
CCCCCCC1=CC=C(C=C1)C2(C3=C(SC4=C3SC5=C4C(C6=C5SC7=C6SC(=C7)/C=C/8\C(=O)C9=C(C8=C(C#N)C#N)C=C(C=C9)C)(C1=CC=C(C=C1)CCCCCC)C1=CC=C(C=C1)CCCCCC)C1=C2C2=C(S1)C=C(S2)/C=C/1\C(=O)C2=C(C1=C(C#N)C#N)C=C(C=C2)C)C1=CC=C(C=C1)CCCCCC	0.0727006
CCCCCCC1=CC=C(C=C1)C2(C3=C(C4=C2C5=C(S4)C6=C(S5)C7=C(C6(C8=CC=C(C=C8)CCCCCC)C9=CC=C(C=C9)CCCCCC)C1=C(S7)C=C(S1)/C=C\1/C(=C(C#N)C#N)C2=C(C1=O)C=CC(=C2)C)SC1=C3SC(=C1)/C=C\1/C(=C(C#N)C#N)C2=C(C1=O)C=C(C=C2)C)C1=CC=C(C=C1)CCCCCC	0.0727006
CCCCCCC1=CC=C(C=C1)C2(C3=C(SC4=C3SC5=C4C(C6=C5SC7=C6SC(=C7CCCCCC)/C=C/8\C(=O)C9=CC=CC=C9C8=C(C#N)C#N)(C1=CC=C(C=C1)CCCCCC)C1=CC=C(C=C1)CCCCCC)C1=C2C2=C(S1)C(=C(S2)/C=C/1\C(=O)C2=CC=CC=C2C1=C(C#N)C#N)CCCCCC)C1=CC=C(C=C1)CCCCCC	0.0640891
CCCCCCCCC1(C2=C(C=CC(=C2)C3=CC=C(S3)/C=C\4/C(=C(C#N)C#N)C5=CC=CC=C5C4=O)C6=C1C=C7C8=C(C=C(C=C8)C9=CC=C(S9)/C=C\1/C(=C(C#N)C#N)C2=CC=CC=C2C1=O)C(C7=C6)(C1=CC=C(C=C1)C(C)(C)C)C1=CC=C(C=C1)C(C)(C)C)CCCCCCCC	0.0655391
CC1=CC=C(C=C1)C2(C3=CC4=C(C=C3C5=C2C=C(C=C5)C)C(C6=C4SC(=C6)CCCC7(C(=C(C#N)C#N)C8=CC=CC=C8C7=O)C)(C9=CC=C(C=C9)C)C1=CC=C(C=C1)C)C1=CC=C(C=C1)C	0.092481
CCCCCCCCC1(C2=CC3=C(C=C2C4=C1C=C(C=C4)C5=CC=C(S5)/C=C\6/C(C7=CC=CC=C7C6=O)C(C#N)C#N)C(C8=C3C=CC(=C8)C9=CC=C(S9)/C=C\1/C(=C(C#N)C#N)C2=CC=CC=C2C1=O)(CCCCCCCC)CCCCCCCC)CCCCCCCC	0.0494486
CC1=CC=C(C=C1)C2(C3=CC4=C(C=C3C5=C2C=C(C=C5)C)C(C6=C4SC7=C6SC(=C7)CC/C=C\8/C(=C(C#N)C#N)C9=CC=CC=C9C8=O)(C1=CC=C(C=C1)C)C1=CC=C(C=C1)C)C1=CC=C(C=C1)C	0.0996791
CC1=CC=C(C=C1)C2(C3=CC4=C(C=C3C5=C2C=C(C=C5)C6=CC=C(S6)C)C(C7=C4SC(=C7)C8=CC=C(S8)CCCC9(C(=C(C#N)C#N)C1=CC=CC=C1C9=O)C)(C1=CC=C(C=C1)C)C1=CC=C(C=C1)C)C1=CC=C(C=C1)C	0.0950384
CC1=CC=C(C=C1)C2(C3=CC4=C(C=C3C5=C2C=C(C=C5)C6=CC=C(S6)C)C(C7=C4SC8=C7SC(=C8)C9=CC=C(S9)CCCC1(C(=C(C#N)C#N)C2=CC=CC=C2C1=O)C)(C1=CC=C(C=C1)C)C1=CC=C(C=C1)C)C1=CC=C(C=C1)C	0.0988862
C1=CC=C(C=C1)C2(C3=CC4=C(C=C3C5=C2C=C(S5)/C=C\6/C(=C(C#N)C#N)C7=C(C6=O)SC8=C7SC=C8)C(C9=C4SC(=C9)/C=C\1/C(=C(C#N)C#N)C2=C(C1=O)SC1=C2SC=C1)(C1=CC=CC=C1)C1=CC=CC=C1)C1=CC=CC=C1	0.102267
C1=CC=C(C=C1)C2(C3=CC4=C(C=C3C5=C2C6=C(S5)C=C(S6)/C=C\7/C(=C(C#N)C#N)C8=C(C7=O)SC9=C8SC=C9)C(C1=C4SC2=C1SC(=C2)/C=C\1/C(=C(C#N)C#N)C2=C(C1=O)SC1=C2SC=C1)(C1=CC=CC=C1)C1=CC=CC=C1)C1=CC=CC=C1	0.108901
CCCCCCCCC1(C2=C(C=CC(=C2)C3=CC=C(S3)/C=C\4/C(=C(C#N)C#N)C5=CC=CC=C5C4=O)C6=C1C=C7C8=C(C=C(C=C8)C9=CC=C(S9)/C=C\1/C(C2=CC=CC=C2C1=O)C(C#N)C#N)C(C7=C6)(C1=CC=C(C=C1)C(C)(C)C)C1=CC=C(C=C1)C(C)(C)C)CCCCCCCC	0.065027
CC1=CC=C(C=C1)C2(C3=CC4=C(C=C3C5=C2C=C6C(=C5)C=C(S6)/C=C\7/C(=C(C#N)C#N)C8=CC=CC=C8C7=O)C(C9=C4SC(=C9)/C=C\1/C(=C(C#N)C#N)C2=CC=CC=C2C1=O)(C1=CC=C(C=C1)C)C1=CC=C(C=C1)C)C1=CC=C(C=C1)C	0.0952112
CC1=CC=C(C=C1)C2(C3=CC4=C(C=C3C5=C2C=C(C=C5)C6=CC=C(S6)/C=C\7/C(=C(C#N)C#N)C8=CC=CC=C8C7=O)C(C9=C4C=CC(=C9)C1=CC=C(S1)/C=C\1/C(=C(C#N)C#N)C2=CC=CC=C2C1=O)(C1=CC=C(C=C1)C)C1=CC=C(C=C1)C)C1=CC=C(C=C1)C	0.0939363
CC1=CC=C(C=C1)C2(C3=CC4=C(C=C3C5=C2C=C(C=C5)/C=C\6/C(=C(C#N)C#N)C7=CC=CC=C7C6=O)C(C8=C4SC9=C8SC(=C9)/C=C\1/C(=C(C#N)C#N)C2=CC=CC=C2C1=O)(C1=CC=C(C=C1)C)C1=CC=C(C=C1)C)C1=CC=C(C=C1)C	0.0952112
CC1=CC=C(C=C1)C2(C3=CC4=C(C=C3C5=C2C=C(C=C5)C6=CC=C(S6)/C=C\7/C(=C(C#N)C#N)C8=CC=CC=C8C7=O)C(C9=C4SC(=C9)C1=CC=C(S1)/C=C\1/C(=C(C#N)C#N)C2=CC=CC=C2C1=O)(C1=CC=C(C=C1)C)C1=CC=C(C=C1)C)C1=CC=C(C=C1)C	0.093495
CC1=CC=C(C=C1)C2(C3=CC4=C(C=C3C5=C2C=C(C=C5)C6=CC=C(S6)/C=C\7/C(=C(C#N)C#N)C8=CC=CC=C8C7=O)C(C9=C4SC1=C9SC(=C1)C1=CC=C(S1)/C=C\1/C(=C(C#N)C#N)C2=CC=CC=C2C1=O)(C1=CC=C(C=C1)C)C1=CC=C(C=C1)C)C1=CC=C(C=C1)C	0.0970453
CC1=CC=C(C=C1)C2(C3=CC4=C(C=C3C5=C2C=C(C=C5)/C=C\6/C(=C(C#N)C#N)C7=CC=CC=C7C6=O)C(C8=C4SC(=C8)/C=C\9/C(=C(C#N)C#N)C1=CC=CC=C1C9=O)(C1=CC=C(C=C1)C)C1=CC=C(C=C1)C)C1=CC=C(C=C1)C	0.0909722
CC1=CC=C(C=C1)C2(C3=CC4=C(C=C3C5=C2C=C6C(=C5)C=C(S6)/C=C\7/C(=C(C#N)C#N)C8=CC=CC=C8C7=O)C(C9=C4SC1=C9SC(=C1)/C=C\1/C(=C(C#N)C#N)C2=CC=CC=C2C1=O)(C1=CC=C(C=C1)C)C1=CC=C(C=C1)C)C1=CC=C(C=C1)C	0.0990577
CCCCCCC1=CC=C(C=C1)C2(C3=CC4=C(C=C3C5=C2C6=C(S5)C=C(S6)/C=C\7/C(=C(\C#N)/[N+]#[C-])/C8=CC=CC=C8C7=O)C(C9=C4SC1=C9SC(=C1)/C=C\1/C(=C(/C#N)\[N+]#[C-])/C2=CC=CC=C2C1=O)(C1=CC=C(C=C1)CCCCCC)C1=CC=C(C=C1)CCCCCC)C1=CC=C(C=C1)CCCCCC	0.070672
CC1=CC=C(C=C1)C2(C3=CC4=C(C=C3C5=C2C6=C(S5)C=C(S6)/C=C\7/C(=C(\C#N)/[N+]#[C-])/C8=CC=CC=C8C7=O)C(C9=C4SC1=C9SC2=C1SC(=C2)/C=C\1/C(=C(C#N)C#N)C2=CC=CC=C2C1=O)(C1=CC=C(C=C1)C)C1=CC=C(C=C1)C)C1=CC=C(C=C1)C	0.102078
CC1=CC=C(C=C1)C2(C3=CC4=C(C=C3C5=C2C6=C(S5)C=C(S6)/C=C\7/C(=C(/C#N)\[N+]#[C-])/C8=CC=CC=C8C7=O)C(C9=C4SC(=C9)/C=C\1/C(=C(\C#N)/[N+]#[C-])/C2=CC=CC=C2C1=O)(C1=CC=C(C=C1)C)C1=CC=C(C=C1)C)C1=CC=C(C=C1)C	0.0947169
CC1=CC=C(C=C1)C2(C3=CC4=C(C=C3C5=C2C6=C(S5)C=C(C=C6)/C=C\7/C(=C(C#N)C#N)C8=CC=CC=C8C7=O)C(C9=C4SC1=C9SC(=C1)/C=C\1/C(=C(C#N)C#N)C2=CC=CC=C2C1=O)(C1=CC=C(C=C1)C)C1=CC=C(C=C1)C)C1=CC=C(C=C1)C	0.0990577
CC1=CC=C(C=C1)C2(C3=CC4=C(C=C3C5=C2C6=C(S5)C=C(C=C6)/C=C\7/C(=C(\C#N)/[N+]#[C-])/C8=CC=CC=C8C7=O)C(C9=C4SC(=C9)/C=C\1/C(=C(C#N)C#N)C2=CC=CC=C2C1=O)(C1=CC=C(C=C1)C)C1=CC=C(C=C1)C)C1=CC=C(C=C1)C	0.0952112
CC1=CC=C(C=C1)C2(C3=CC4=C(C=C3C5=C2C6=C(S5)C=C(S6)C7=CC=C(S7)/C=C\8/C(=C(/C#N)\[N+]#[C-])/C9=CC=CC=C9C8=O)C(C1=C4SC(=C1)C1=CC=C(S1)/C=C\1/C(=C(\C#N)/[N+]#[C-])/C2=CC=CC=C2C1=O)(C1=CC=C(C=C1)C)C1=CC=C(C=C1)C)C1=CC=C(C=C1)C	0.0966105
CC1=CC=C(C=C1)C2(C3=CC4=C(C=C3C5=C2C6=C(S5)C7=C(S6)C=C(S7)/C=C\8/C(=C(C#N)C#N)C9=CC=CC=C9C8=O)C(C1=C4SC(=C1)/C=C\1/C(=C(C#N)C#N)C2=CC=CC=C2C1=O)(C1=CC=C(C=C1)C)C1=CC=C(C=C1)C)C1=CC=C(C=C1)C	0.0985672
CC1=CC=C(C=C1)C2(C3=CC4=C(C=C3C5=C2C6=C(S5)C7=C(S6)C=C(S7)C8=CC=C(S8)/C=C\9/C(=C(C#N)C#N)C1=CC=CC=C1C9=O)C(C1=C4SC(=C1)C1=CC=C(S1)/C=C\1/C(=C([N+]#[C-])[N+]#[C-])C2=CC=CC=C2C1=O)(C1=CC=C(C=C1)C)C1=CC=C(C=C1)C)C1=CC=C(C=C1)C	0.0998789
CCCCCCC1=CC=C(C=C1)C2(C3=CC4=C(C=C3C5=C2C6=C(S5)C=C(S6)/C=C\7/C(=C(C#N)C#N)C8=CC=CC=C8C7=O)C(C9=C4SC(=C9)/C=C\1/C(=C(C#N)C#N)C2=CC=CC=C2C1=O)(C1=CC=C(C=C1)CCCCCC)C1=CC=C(C=C1)CCCCCC)C1=CC=C(C=C1)CCCCCC	0.0669958
CC1=CC=C(C=C1)C2(C3=CC4=C(C=C3C5=C2C6=C(S5)C=C(S6)C7=CC=C(S7)/C=C\8/C(=C(\C#N)/[N+]#[C-])/C9=CC=CC=C9C8=O)C(C1=C4SC2=C1SC1=C2SC(=C1)C1=CC=C(S1)/C=C\1/C(=C(C#N)C#N)C2=CC=CC=C2C1=O)(C1=CC=C(C=C1)C)C1=CC=C(C=C1)C)C1=CC=C(C=C1)C	0.102896
CC1(C2=CC=CC=C2C3=C1C4=C(S3)C5=C(S4)C6=CC=CC=C6C5(C)C)C.C=C1C(=C(C#N)C#N)C2=CC=CC=C2C1=O.C=C1C(=C(C#N)C#N)C2=CC=CC=C2C1=O	0.0880541
CC1=CC=C(S1)C2(C3=CC=CC=C3C4=C2C5=C(S4)C6=C(S5)C7=C(C6(C8=CC=C(S8)C)C9=CC=C(S9)C)C=C(C=C7)C/C=C\1/C(=C(C#N)C#N)C2=CC=CC=C2C1=O)C1=CC=C(S1)C	0.101084
CC1(C2=C(C=CC(=C2)C3=CC=CS3)C4=C1C5=C(S4)C6=C(S5)C7=C(C6(C)C)C=C(C=C7)C8=CC=C(S8)C9CC91C(=C(C#N)C#N)C2=CC=CC=C2C1=O)C	0.100626
CC1=CC=C(C=C1)C2(C3=CC=CC=C3C4=C2C5=C(S4)C6=C(S5)C7=CC=CC=C7C6(C8=CC=C(C=C8)C)C9=CC=C(C=C9)C)C1=CC=C(C=C1)C.C=C1C(=C(C#N)C#N)C2=CC=CC=C2C1=O	0.107163
CC1(C2=C(SC3=C2SC4=C3C(C5=C4C=C6C(=C5)SC(=C6)C/C=C/7\C(=O)C8=CC=CC=C8C7=C(C#N)C#N)(C)C)C9=C1C=C1SC(=CC1=C9)C/C=C/1\C(=O)C2=CC=CC=C2C1=C(C#N)C#N)C	0.0926721
CCC1=CC=C(C=C1)[C@]2(C3=C(C4=C2C5=C(S4)C6=C(S5)C7=C(C6(C8=CC=C(C=C8)C)C9=CC=C(C=C9)CC)C=C(S7)/C=C\1/C(=C(C#N)C#N)C2=CC=CC=C2C1=O)SC(=C3)/C=C\1/C(=C(C#N)C#N)C2=CC=CC=C2C1=O)C1=CC=C(C=C1)C	0.0905024
C/C=C/1\C(=O)C2=CC=CC=C2C1=C(C#N)C#N.C/C=C/1\C(=O)C2=CC=CC=C2C1=C(C#N)C#N.CC1=CC=C(S1)C2(C3=C(SC4=C3SC5=C4C(C6=C5C=CC(=C6)C7=CC=CS7)(C8=CC=C(S8)C)C9=CC=C(S9)C)C1=C2C=C(C=C1)C1=CC=CS1)C1=CC=C(S1)C	0.0944917
CC.CC1=CC=C(C=C1)C2(C3=C(SC4=C3SC5=C4C(C6=C5SC(=C6)C7=CC=C(S7)/C=C/8\C(=O)C9=CC=CC=C9C8=C(C#N)C#N)(C1=CC=C(C=C1)C)C1=CC=C(C=C1)C)C1=C2C=C(S1)C1=CC=C(S1)/C=C/1\C(=O)C2=CC=CC=C2C1=C(C#N)C#N)C1=CC=C(C=C1)C	0.0940864
CCCCCCCCC1=CC=C(C=C1)C2(C3=C(SC4=C3SC5=C4C(C6=C5SC(=C6)/C=C/7\C(=O)C8=CC=CC=C8C7=C(C#N)C#N)(C9=CC=C(C=C9)CCCCCCCC)C1=CC=C(C=C1)C)C1=C2C=C(S1)/C=C/1\C(=O)C2=CC=CC=C2C1=C(C#N)C#N)C1=CC=C(C=C1)C	0.0731499
CC1(C2=CC3=C(C=C2C4=C1C=C(S4)/C=C\5/C(=C(C#N)C#N)C6=CC=CC=C6C5=O)C(C7=C3SC(=C7)/C=C\8/C(=C(C#N)C#N)C9=CC=CC=C9C8=O)(C)C)C	0.0788567
CCCCCCC1CC=C(C=C1)C2(C3=CC4=C(C=C3C5=C2C6=C(S5)C=C(S6)/C=C\7/C(=C(C#N)C#N)C8=CC=CC=C8C7=O)C(C9=C4SC1=C9SC(=C1)/C=C\1/C(=C(C#N)C#N)C2=CC=CC=C2C1=O)(C1=CC=C(C=C1)CCCCCC)C1=CC=C(C=C1)CCCCCC)C1=CC=C(C=C1)C	0.0696262
CC1(C2=C(C3=C(S2)C4=C(S3)C5=C(S4)C(C6=C5C=C(C=C6)/C=C/7\C(=O)C8=CC=CC=C8\C7=C(\C#N)/C#C)(C)C)C9=C1C=CC(=C9)/C=C/1\C(=O)C2=CC=CC=C2\C1=C(\C#N)/C#C)C	0.0924805
CC1(C2=CC3=C(C=C2C4=C1C5=C(S4)C=C(S5)/C=C\6/C(=C(C#N)C#N)C7=CC=CC=C7C6=O)C8=C(C3(C)C)C9=C(S8)C=C(S9)/C=C\1/C(=C(C#N)C#N)C2=CC=CC=C2C1=O)C	0.0916326
C1=CC=C(C=C1)C2(C3=C(SC4=C3C(C5=C4SC(=C5)/C=C/6\C(=O)C7=CC=CC=C7C6=C(C#N)C#N)(C8=CC=CC=C8)C9=CC=CC=C9)C1=C2C=C(S1)/C=C/1\C(=O)C2=CC=CC=C2C1=C(C#N)C#N)C1=CC=CC=C1	0.0947699
C1=CC=C(C=C1)C2(C3=CC4=C(C=C3C5=C2C6=C(S5)C=C(S6)/C=C\7/C(=C(C#N)C#N)C8=CC=CC=C8C7=O)C(C9=C4SC1=C9SC(=C1)/C=C\1/C(=C(C#N)C#N)C2=CC=CC=C2C1=O)(C1=CC=CC=C1)C1=CC=CC=C1)C1=CC=CC=C1	0.103329
CC1(C2=C(SC3=C2C(C4=C3SC(=C4)/C=C/5\C(=O)C6=CC=CC=C6C5=C(C#N)C#N)(C)C)C7=C1C=C(S7)/C=C/8\C(=O)C9=CC=CC=C9C8=C(C#N)C#N)C	0.0782368
CC1=C(SC2=C1SC(=C2)/C=C/3\C(=O)C4=CC=CC=C4C3=C(C#N)C#N)C5=CC6=C(S5)C7=C(S6)C8=C(C7(C)C)C9=C(S8)C1=C(C9(C)C)C2=C(S1)C=C(S2)C1=C(C2=C(S1)C=C(S2)/C=C/1\C(=O)C2=CC=CC=C2C1=C(C#N)C#N)C	0.0997036
CC1(C2=C(SC3=C2SC(=C3)/C=C/4\C(=O)C5=CC=CC=C5C4=C(C#N)C#N)C6=C1C7=C(S6)C8=C(C7(C)C)C9=C(S8)C=C(S9)/C=C/1\C(=O)C2=CC=CC=C2C1=C(C#N)C#N)C	0.0910041
CC1(C2=C(SC3=C2C(C4=C3SC5=C4C=CC(=C5)/C=C/6\C(=O)C7=CC=CC=C7C6=C(C#N)C#N)(C)C)C8=C1C9=C(S8)C=C(C=C9)/C=C/1\C(=O)C2=CC=CC=C2C1=C(C#N)C#N)C	0.0922698
CC1(C2=CC3=CC4=C(C=C3C=C2C5=C1C6=C(S5)C=C(S6)/C=C\7/C(=C(C#N)C#N)C8=CC=CC=C8C7=O)C9=C(C4(C)C)C1=C(S9)C=C(S1)/C=C\1/C(=C(C#N)C#N)C2=CC=CC=C2C1=O)C	0.0974963
CCCCCCC1=CC=C(C=C1)CS/C(=C/2\C3=C(C4=C2C=C5C(=C4)C(=C(SC6=CC=C(C=C6)CCCCCC)SC7=CC=C(C=C7)CCCCCC)C8=C5SC(=C8)/C=C\9/C(=C(C#N)C#N)C1=CC=CC=C1C9=O)SC(=C3)/C=C\1/C(=C(C#N)C#N)C2=CC=CC=C2C1=O)/SC1=CC=C(C=C1)CCCCCC	0.0554901
CC1C2C(=CC3=C1C(=C(SCCC(C)CCCC(C)C)SCCC(C)CCCC(C)C)C4=C3SC(=C4)/C=C\5/C(=C(C#N)C#N)C6=CC=CC=C6C5=O)C(=C(SCCC(C)CCCC(C)C)SCCC(C)CCCC(C)C)C7=C2SC(=C7)C[C@@]8(C(=C(C#N)C#N)C9=CC=CC=C9C8=O)C	0.0280864
CCCCCCC1=CC=C(S1)CS/C(=C/2\C3=C(C4=C2C=C5C(=C4)C(=C(SC6=CC=C(S6)CCCCCC)SC7=CC=C(S7)CCCCCC)C8=C5SC(=C8)/C=C\9/C(=C(C#N)C#N)C1=CC=CC=C1C9=O)SC(=C3)/C=C\1/C(=C(C#N)C#N)C2=CC=CC=C2C1=O)/SC1=CC=C(S1)CCCCCC	0.0547573
CCCCCCC1=CC=C(C=C1)CS/C(=C/2\C3=CC4=C(C=C3C5=C2C=C(S5)/C=C\6/C(=C(C#N)C#N)C7=CC=CC=C7C6=O)C(=C(SCC8=CC=C(C=C8)CCCCCC)SCC9=CC=C(C=C9)CCCCCC)C1=C4SC(=C1)/C=C\1/C(=C(C#N)C#N)C2=CC=CC=C2C1=O)/SC1=CC=C(C=C1)CCCCCC	0.0540489
CCCCCCC1=CC=C(C=C1)C2(C3=CC4=C(C=C3C5=C2C6=C(S5)C=C(S6)/C=C\7/C(=C(C#N)C#N)C8=CC=CC=C8C7=O)C(C9=C4SC1=C9SC(=C1)/C=C\1/C(=C(C#N)C#N)C2=CC=CC=C2C1=O)(C1=CC=C(C=C1)C)C1=CC=C(C=C1)CCCCCC)C1=CC=C(C=C1)CCCCCC	0.0760529
CC1=CC2=C(C=C1)C3=C(C2(C)C)C4=C(S3)C5=C(S4)C6=C(C5(C)C)C=C(C=C6)CCC7(C(=C(C#N)C#N)C8=CC=CC=C8C7=O)C	0.0907931
CC1=CC=C(C=C1)C2(C3=C(SC4=C3SC5=C4C(C6=C5C=CC(=C6)C7=CC=C(S7)/C=C/8\C(=O)C9=CC=CC=C9C8=C(C#N)C#N)(C1=CC=C(C=C1)C)C1=CC=C(C=C1)C)C1=C2C=C(C=C1)C1=CC=C(S1)/C=C/1\C(=O)C2=CC=CC=C2C1=C(C#N)C#N)C1=CC=C(C=C1)C	0.0970453
CC1=CC=C(S1)C2=CC3=C(C=C2)C4=C(C3(C5=CC=C(S5)C)C6=CC=C(S6)C)C7=C(S4)C8=C(S7)C9=C(C8(C1=CC=C(S1)C)C1=CC=C(S1)C)C=C(C=C9)C1=CC=C(S1)C/C=C\1/C(=C(C#N)C#N)C2=CC=CC=C2C1=O	0.101047
CC1=CC=C(C=C1)C2(C3=C(C=CC(=C3)C4=CC=C(S4)C)C5=C2C6=C(S5)C7=C(S6)C8=C(C7(C9=CC=C(C=C9)C)C1=CC=C(C=C1)C)C=C(C=C8)C1=CC=C(S1)CC/C=C\1/C(=C(C#N)C#N)C2=CC=CC=C2C1=O)C1=CC=C(C=C1)C	0.101055
CC1=CC=C(C=C1)C2(C3=C(C=CC(=C3)C)C4=C2C5=C(S4)C6=C(S5)C7=C(C6(C8=CC=C(C=C8)C)C9=CC=C(C=C9)C)C=C(C=C7)CCCC1(C(=C(C#N)C#N)C2=CC=CC=C2C1=O)C)C1=CC=C(C=C1)C	0.097157
CC1=CC=C(C=C1)C2(C3=C(SC4=C3C(C5=C4C=CC(=C5)C6=CC=C(S6)/C=C/7\C(=O)C8=CC=CC=C8C7=C(C#N)C#N)(C9=CC=C(C=C9)C)C1=CC=C(C=C1)C)C1=C2C=C(C=C1)C1=CC=C(S1)/C=C/1\C(=O)C2=CC=CC=C2C1=C(C#N)C#N)C1=CC=C(C=C1)C	0.093495
CCCCCCC1=CC=C(C=C1)C2(C3=C(C4=C2C5=C(S4)C=C(S5)/C=C\6/C(=C(C#N)C#N)C7=CC=CC=C7C6=O)SC(=C3)/C=C\8/C(=C(C#N)C#N)C9=CC=CC=C9C8=O)C1=CC=C(C=C1)C	0.0805533
CC1=CC=C(C=C1)C2(C3=CC4=C(C=C3C5=C2C=C(C=C5)C=C6C(=C(C#N)C#N)C7=CC=CC=C7C6=O)C(C8=C4SC9=C8SC(=C9)C=C1C(=C(C#N)C#N)C2=CC=CC=C2C1=O)(C1=CC=C(C=C1)C)C1=CC=C(C=C1)C)C1=CC=C(C=C1)C	0.0952112
CC1=CC=C(S1)C2(C3=C(C=CC(=C3)C4=CC=C(S4)C=C5C(=C(C#N)C#N)C6=CC=CC=C6C5=O)C7=C2C8=C(S7)C9=C(S8)C1=C(C9(C2=CC=C(S2)C)C2=CC=C(S2)C)C=C(C=C1)C1=CC=C(S1)C=C1C(=C(C#N)C#N)C2=CC=CC=C2C1=O)C1=CC=C(S1)C	0.0953292
CC1(C2=C(C3=C1C4=C(S3)C5=C(S4)C6=C(C5(C)C)C=C(S6)C7=CC=C(S7)C=C8C(=C(C#N)C#N)C9=CC=CC=C9C8=O)SC(=C2)C1=CC=C(S1)C=C1C(=C(C#N)C#N)C2=CC=CC=C2C1=O)C	0.0893526
CCCCCCC1=CC=C(C=C1)C2(C3=CC4=C(C=C3C5=C2C6=C(S5)C=C(S6)C7=CC=C(S7)/C=C\8/C(=C(C#N)C#N)C9=CSC=C9C8=O)C(C1=C4SC2=C1SC(=C2)C1=CC=C(S1)/C=C\1/C(=C(C#N)C#N)C2=CSC=C2C1=O)(C1=CC=CC=C1)C1=CC=C(C=C1)CCCCCC)C1=CC=C(C=C1)CCCCCC	0.0795394
CCCCCCC1=CC=C(C=C1)C2(C3=CC4=C(C=C3C5=C2C6=C(S5)C=C(S6)/C=C\7/C(=C(\C#N)/[N+]#[C-])/C8=C(C7=O)C=C(C(=C8)C)C)C(C9=C4SC1=C9SC(=C1)/C=C\1/C(=C(/C#N)\[N+]#[C-])/C2=C(C1=O)C=C(C(=C2)C)C)(C1=CC=C(C=C1)CCCCCC)C1=CC=C(C=C1)CCCCCC)C1=CC=C(C=C1)CCCCCC	0.0684115
CCCCCCC1=CC=C(S1)CSC(=C2C3=CC4=C(C=C3C5=C2C=C(S5)/C=C\6/C(=C(C#N)C#N)C7=CC=CC=C7C6=O)C(=C(SCC8=CC=C(S8)CCCCCC)SCC9=CC=C(S9)CCCCCC)C1=C4SC(=C1)/C=C\1/C(=C(C#N)C#N)C2=CC=CC=C2C1=O)SCC1=CC=C(S1)CCCCCC	0.0526782
CC1=CC=C(S1)C2(C3=C(SC4=C3SC5=C4C(C6=C5C=CC(=C6)/C=C/7\C(=O)C8=CC=CC=C8C7=C(C#N)C#N)(C9=CC=C(S9)C)C1=CC=C(S1)C)C1=C2C=C(C=C1)/C=C/1\C(=O)C2=CC=CC=C2C1=C(C#N)C#N)C1=CC=C(S1)C	0.0932644
CC1(C2=C(SC3=C2C(C4=C3C=CC(=C4)/C=C/5\C(=O)C6=CC=CC=C6C5=C(C#N)C#N)(C)C)C7=C1C=C(C=C7)/C=C/8\C(=O)C9=CC=CC=C9C8=C(C#N)C#N)C	0.0794865
CCCCCCC1=CC=C(C=C1)CSC(=C2C3=CC4=C(C=C3C5=C2C=C(S5)/C=C\6/C(=C(C#N)C#N)C7=CC=CC=C7C6=O)C(=C(SCC8=CC=C(C=C8)CCCCCC)SCC9=CC=C(C=C9)CCCCCC)C1=C4SC(=C1)/C=C\1/C(=C(C#N)C#N)C2=CC=CC=C2C1=O)SCC1=CC=C(C=C1)CCCCCC	0.053356
C1=CSC(=C1)C2(C3=CC4=C(C=C3C5=C2C6=C(S5)C=C(S6)/C=C\7/C(=C(C#N)C#N)C8=C(C7=O)SC9=C8SC=C9)C(C1=C4SC2=C1SC(=C2)/C=C\1/C(=C(C#N)C#N)C2=C(C1=O)SC1=C2SC=C1)(C1=CC=CS1)C1=CC=CS1)C1=CC=CS1	0.106896
CC1=CC=C(C=C1)C2(C3=CC4=C(C=C3C5=C2C=C(C=C5)C6=CC=C(S6)C=C7C(=C(C#N)C#N)C8=CC=CC=C8C7=O)C(C9=C4SC1=C9SC(=C1)C1=CC=C(S1)C=C1C(=C(C#N)C#N)C2=CC=CC=C2C1=O)(C1=CC=C(C=C1)C)C1=CC=C(C=C1)C)C1=CC=C(C=C1)C	0.0970453
CC(C)CCCC(C)CCSC(=C1C2=CC3=C(C=C2C4=C1C=C(S4)/C=C\5/C(=C(\C#N)/[N+]#[C-])/C6=CC=CC=C6C5=O)C(=C(SCCC(C)CCCC(C)C)SCCC(C)CCCC(C)C)C7=C3SC(=C7)/C=C\8/C(=C(/C#N)\[N+]#[C-])/C9=CC=CC=C9C8=O)SCCC(C)CCCC(C)C	0.0345197
CCCCCCC1=CC=C(C=C1)CSC(=C2C3=CC4=C(C=C3C5=C2C=C(S5)/C=C\6/C(=C(\C#N)/[N+]#[C-])/C7=CC=CC=C7C6=O)C(=C(SCC8=CC=C(C=C8)CCCCCC)SCC9=CC=C(C=C9)CCCCCC)C1=C4SC(=C1)/C=C\1/C(=C(/C#N)\[N+]#[C-])/C2=CC=CC=C2C1=O)SCC1=CC=C(C=C1)CCCCCC	0.053356
CCCCC(CC)CSC(=C1C2=CC3=C(C=C2C4=C1C=C(S4)/C=C\5/C(=C(\C#N)/[N+]#[C-])/C6=CC=CC=C6C5=O)C(=C(SCC(CC)CCCC)SCC(CC)CCCC)C7=C3SC(=C7)/C=C\8/C(=C(/C#N)\[N+]#[C-])/C9=CC=CC=C9C8=O)SCC(CC)CCCC	0.0378329
CCCCCCC1=CC=C(S1)C2(C3=CC4=C(C=C3C5=C2C6=C(S5)C=C(S6)/C=C\7/C(=C(\C#N)/[N+]#[C-])/C8=CC=CC=C8C7=O)C(C9=C4SC1=C9SC(=C1)/C=C\1/C(=C(/C#N)\[N+]#[C-])/C2=CC=CC=C2C1=O)(C1=CC=C(S1)CCCCCC)C1=CC=C(S1)CCCCCC)C1=CC=C(S1)CCCCCC	0.0696824
CCCCCCCCCCCCCCCCC1=CC=C(C=C1)C2(C3=C(C=CC(=C3)C4=CC=C(S4)/C=C\5/C(=C(\C#CN)/C#N)/C6C=CC=CC6C5=O)C7=C2C8=C(S7)C9=C(C8(C1=CC=C(C=C1)CCCCCCCCCCCCCCCC)C1=CC=C(C=C1)CCCCCCCCCCCCCCCC)C=C(C=C9)C1=CC=C(S1)/C=C\1/C(=C(C#N)C#N)C2=CC=CC=C2C1=O)C1=CC=C(C=C1)CCCCCCCCCCCCCCCC	0.0401291
CCCCCCC1=CC=C(C=C1)C2(C3=C(SC4=C3C(C5=C4C=CC(=C5)C6=CC=C(S6)/C=C/7\C(=O)C8=CC=CC=C8C7=C(C#N)C#N)(C9=CC=C(C=C9)CCCCCC)C1=CC=C(C=C1)CCCCCC)C1=C2C=C(C=C1)C1=CC=C(S1)/C=C/1\C(=O)C2=CC=CC=C2C1=C(C#N)C#N)C1=CC=C(C=C1)CCCCCC	0.068026
CCCCCCC1=CC=C(S1)C2(C3=CC4=C(C=C3C5=C2C=C(S5)C6=C(C=C(S6)/C=C/7\C(=C(/C#N)\[N+]#[C-])\C8=CC=CC=C8C7=O)CC(CC)CCCC)C(C9=C4SC(=C9)C1=C(C=C(S1)/C=C/1\C(=C(\C#N)/[N+]#[C-])\C2=CC=CC=C2C1=O)CC(CC)CCCC)(C1=CC=C(S1)CCCCCC)C1=CC=C(S1)CCCCCC)C1=CC=C(S1)CCCCCC	0.0561113
CCCCCCC1=CC=C(S1)C2(C3=CC4=C(C=C3C5=C2C=C(S5)C6=C(C=C(S6)/C=C/7\C(=C(/C#N)\[N+]#[C-])\C8=CC=CC=C8C7=O)CC(CCCCCC)CCCCCC)C(C9=C4SC(=C9)C1=C(C=C(S1)/C=C/1\C(=C(\C#N)/[N+]#[C-])\C2=CC=CC=C2C1=O)CC(CCCCCC)CCCCCC)(C1=CC=C(S1)CCCCCC)C1=CC=C(S1)CCCCCC)C1=CC=C(S1)CCCCCC	0.0494451
CCCCCCC1=CC=C(S1)C2(C3=CC4=C(C=C3C5=C2C6=C(S5)C=C(S6)/C=C\7/C(=C(\C#N)/[N+]#[C-])/C8=CC=CC=C8C7=O)C(C9=C4SC1=C9SC(=C1)/C=C/1\C(=C([N+]#[C-])[N+]#[C-])C2=CC=CC=C2C1=O)(C1=CC=C(S1)CCCCCC)C1=CC=C(S1)CCCCCC)C1=CC=C(S1)CCCCCC	0.0696824
CCCCCCC1=CC=C(C=C1)C2(C3=CC4=C(C=C3C5=C2C=C(S5)/C=C\6/C(=C(C#N)C#N)C7=C(C6=O)SC8=C7SC=C8)C(C9=C4SC(=C9)/C=C\1/C(=C(C#N)C#N)C2=C(C1=O)SC1=C2SC=C1)(C1=CC=C(C=C1)CCCCCC)C1=CC=C(C=C1)CCCCCC)C1=CC=C(C=C1)CCCCCC	0.0701737
CCCCCCC1=CC=S(C1)C2(C3=CC4=C(C=C3C5=C2C6=C(S5)C=C(S6)/C=C\7/C(=C(C#N)C#N)C8=C(C7=O)SC9=C8SC=C9)C(C1=C4SC2=C1SC(=C2)/C=C\1/C(=C(C#N)C#N)C2=C(C1=O)SC1=C2SC=C1)(C1=CC=C(S1)CCCCCC)C1=CC=C(S1)CCCCCC)C1=CC=C(S1)CCCCCC	0.0703329
CCCCCCC1=CC=C(C=C1)C2(C3=CC4=C(C=C3C5=C2C=C(S5)C6=C(C=C(S6)/C=C\7/C(=C(C#N)C#N)C8=C(C7=O)SC9=C8SC=C9)CC(CC)CCCC)C(C1=C4SC(=C1)C1=C(C=C(S1)/C=C\1/C(=C(C#N)C#N)C2=C(C1=O)SC1=C2SC=C1)CC(CC)CCCC)(C1=CC=C(C=C1)CCCCCC)C1=CC=C(C=C1)CCCCCC)C1=CC=C(C=C1)CCCCCC	0.0625355
CCCCCCC1=CC=C(C=C1)C2(C3=CC4=C(C=C3C5=C2C=C(S5)C6=C(C=C(S6)/C=C\7/C(=C(\C#N)/[N+]#[C-])/C8=CC=CC=C8C7=O)CC(CC)CCCC)C(C9=C4SC(=C9)C1=C(C=C(S1)/C=C\1/C(=C(/C#N)\[N+]#[C-])/C2=CC=CC=C2C1=O)CC(CC)CCCC)(C1=CC=C(C=C1)CCCCCC)C1=CC=C(C=C1)CCCCCC)C1=CC=C(C=C1)CCCCCC	0.0567512
CCCCCCC1=CC=C(C=C1)C2(C3=CC4=C(C=C3C5=C2C6=C(S5)C=C(S6)/C=C\7/C(=C(C#N)C#N)C8=C(C7=O)SC9=C8SC=C9)C(C1=C4SC2=C1SC(=C2)/C=C\1/C(=C(C#N)C#N)C2=C(C1=O)SC1=C2SC=C1)(C1=CC=C(C=C1)CCCCCC)C1=CC=C(C=C1)CCCCCC)C1=CC=C(C=C1)CCCCCC	0.0768294
CCCCCCCCC1=CC=C(C=C1)C2(C3=C(SC4=C3SC5=C4C(C6=C5SC(=C6)/C=C/7\C(=O)C8=CC=CC=C8C7=C(C#N)C#N)(C9=CC=C(C=C9)CCCCCCCC)C1=CC=C(C=C1)CCCCCCCC)C1=C2C=C(S1)/C=C/1\C(=O)C2=CC=CC=C2C1=C(C#N)C#N)C1=CC=C(C=C1)CCCCCCCC	0.0597781
CCCCCCC1=CC(=CC=C1)C2(C3=C(SC4=C3SC5=C4C(C6=C5C=CC(=C6)C7=CC=C(S7)/C=C/8\C(=O)C9=CC=CC=C9C8=C(C#N)C#N)(C1=CC=CC(=C1)CCCCCC)C1=CC=CC(=C1)CCCCCC)C1=C2C=C(C=C1)C1=CC=C(S1)/C=C/1\C(=O)C2=CC=CC=C2C1=C(C#N)C#N)C1=CC=CC(=C1)CCCCCC	0.0714239
CCCCCCC1=CC(=CC(=C1)C2(C3=C(SC4=C3SC5=C4C(C6=C5SC(=C6)/C=C/7\C(=O)C8=CC=CC=C8C7=C(C#N)C#N)(C9=CC(=CC(=C9)CCCCCC)CCCCCC)C1=CC(=CC(=C1)CCCCCC)CCCCCC)C1=C2C=C(S1)/C=C/1\C(=O)C2=CC=CC=C2C1=C(C#N)C#N)C1=CC(=CC(=C1)CCCCCC)CCCCCC)CCCCCC	0.0503531
CCCCCCCCC1=CC=C(C=C1)C2(C3=C(C4=C2C5=C(S4)C6=C(S5)C7=C(C6(C8=CC=C(C=C8)CCCCCCCC)C9=CC=C(C=C9)CCCCCCCC)C=C(S7)C1=CC=C(S1)/C=C\1/C(=C(C#N)C#N)C2=CC=CC=C2C1=O)SC(=C3)C1=CC=C(S1)/C=C\1/C(C2=CC=CC=C2C1=O)C(C#N)C#N)C1=CC=C(C=C1)CCCCCCCC	0.0638378
CCCCCCC1=CC=C(C=C1)C2(C3=C(SC4=C3SC5=C4C(C6=C5C=CC(=C6)C7=CC=C(S7)/C=C/8\C(=O)C9=CC=CC=C9C8=C(C#N)C#N)(C1=CC=C(C=C1)CCCCCC)C1=CC=C(C=C1)CCCCCC)C1=C2C=C(C=C1)C1=CC=C(S1)/C=C/1\C(=O)C2=CC=CC=C2C1=C(C#N)C#N)C1=CC=C(C=C1)CCCCCC	0.0714239
CCCCCCCCCCCCCCCCC1=CC=C(C=C1)C2(C3=C(SC4=C3C(C5=C4C=CC(=C5)C6=CC=C(S6)/C=C/7\C(=O)C8=CC=CC=C8C7=C(C#N)C#N)(C9=CC=C(C=C9)CCCCCCCCCCCCCCCC)C1=CC=C(C=C1)CCCCCCCCCCCCCCCC)C1=C2C=C(C=C1)C1=CC=C(S1)/C=C/1\C(=O)C2=CC=CC=C2C1=C(C#N)C#N)C1=CC=C(C=C1)CCCCCCCCCCCCCCCC	0.0440349
CCCCCCCCCCCCC1=CC=C(C=C1)C2(C3=C(SC4=C3SC5=C4C(C6=C5C=CC(=C6)C7=CC=C(S7)/C=C/8\C(=O)C9=CC=CC=C9C8=C(C#N)C#N)(C1=CC=C(C=C1)CCCCCCCCCCCC)C1=CC=C(C=C1)CCCCCCCCCCCC)C1=C2C=C(C=C1)C1=CC=C(S1)/C=C/1\C(=O)C2=CC=CC=C2C1=C(C#N)C#N)C1=CC=C(C=C1)CCCCCCCCCCCC	0.0542397
CC1=CC=C(S1)C2(C3=C(SC4=C3SC5=C4C(C6=C5SC(=C6)/C=C/7\C(=O)C8=CC=CC=C8C7=C(C#N)C#N)(C9=CC=C(S9)C)C1=CC=C(S1)C)C1=C2C=C(S1)/C=C/1\C(=O)C2=CC=CC=C2C1=C(C#N)C#N)C1=CC=C(S1)C	0.0923206
CC1(C2=C(SC3=C2SC4=C3C(C5=C4SC(=C5)/C=C/6\C(=O)C7=CC=CC=C7C6=C(C#N)C#N)(C)C)C8=C1C=C(S8)/C=C/9\C(=O)C1=CC=CC=C1C9=C(C#N)C#N)C	0.0850555
CC1=CC=C(S1)C2(C3=C(SC4=C3SC5=C4C(C6=C5SC(=C6)C7=CC=C(S7)/C=C/8\C(=O)C9=CC=CC=C9C8=C(C#N)C#N)(C1=CC=C(S1)C)C1=CC=C(S1)C)C1=C2C=C(S1)C1=CC=C(S1)/C=C/1\C(=O)C2=CC=CC=C2C1=C(C#N)C#N)C1=CC=C(S1)C	0.0944936
CCCCCCCCC1=CC=C(C=C1)C2(C3=C(SC4=C3SC5=C4C(C6=C5SC(=C6)C7=CC=C(S7)/C=C/8\C(=O)C9=CC=CC=C9C8=C(C#N)C#N)(C1=CC=C(C=C1)CCCCCCCC)C1=CC=C(C=C1)CCCCCCCC)C1=C2C=C(S1)C1=CC=C(S1)/C=C/1\C(=O)C2=CC=CC=C2C1=C(C#N)C#N)C1=CC=C(C=C1)CCCCCCCC	0.0642167
CC1=CC=C(S1)C2(C3=C(SC4=C3SC5=C4C(C6=C5SC7=C6SC(=C7)C8=CC=C(S8)/C=C/9\C(=O)C1=CC=CC=C1C9=C(C#N)C#N)(C1=CC=C(S1)C)C1=CC=C(S1)C)C1=C2C2=C(S1)C=C(S2)C1=CC=C(S1)/C=C/1\C(=O)C2=CC=CC=C2C1=C(C#N)C#N)C1=CC=C(S1)C	0.100811
CC1(C2=C(SC3=C2SC4=C3C(C5=C4C=CC(=C5)C6=CC=C(S6)/C=C/7\C(=O)C8=CC=CC=C8C7=C(C#N)C#N)(C)C)C9=C1C=C(C=C9)C1=CC=C(S1)/C=C/1\C(=O)C2=CC=CC=C2C1=C(C#N)C#N)C	0.0904352
CC1(C2=C(SC3=C2SC4=C3C(C5=C4SC6=C5SC(=C6)/C=C/7\C(=O)C8=CC=CC=C8C7=C(C#N)C#N)(C)C)C9=C1C1=C(S9)C=C(S1)/C=C/1\C(=O)C2=CC=CC=C2C1=C(C#N)C#N)C	0.0962392
CC1=CC=C(C=C1)C2(C3=C(SC4=C3SC5=C4C(C6=C5SC7=C6SC(=C7)/C=C/8\C(=O)C9=CC=CC=C9C8=C(C#N)C#N)(C1=CC=C(C=C1)C)C1=CC=C(C=C1)C)C1=C2C2=C(S1)C=C(S2)/C=C/1\C(=O)C2=CC=CC=C2C1=C(C#N)C#N)C1=CC=C(C=C1)C	0.101597
CC1=CC=C(S1)C2(C3=C(SC4=C3SC5=C4C(C6=C5C=CC(=C6)C7=CC=C(S7)/C=C/8\C(=O)C9=CC=CC=C9C8=C(C#N)C#N)(C1=CC=C(S1)C)C1=CC=C(S1)C)C1=C2C=C(C=C1)C1=CC=C(S1)/C=C/1\C(=O)C2=CC=CC=C2C1=C(C#N)C#N)C1=CC=C(S1)C	0.0953292
CC1(C2=C(SC3=C2SC4=C3C(C5=C4SC(=C5)C6=CC=C(S6)/C=C/7\C(=O)C8=CC=CC=C8C7=C(C#N)C#N)(C)C)C9=C1C=C(S9)C1=CC=C(S1)/C=C/1\C(=O)C2=CC=CC=C2C1=C(C#N)C#N)C	0.0893526
CC1=CC=C(C=C1)C2(C3=C(SC4=C3SC5=C4C(C6=C5SC7=C6SC(=C7)C8=CC=C(S8)/C=C/9\C(=O)C1=CC=CC=C1C9=C(C#N)C#N)(C1=CC=C(C=C1)C)C1=CC=C(C=C1)C)C1=C2C2=C(S1)C=C(S2)C1=CC=C(S1)/C=C/1\C(=O)C2=CC=CC=C2C1=C(C#N)C#N)C1=CC=C(C=C1)C	0.102472
CC1=CC=C(S1)C2(C3=C(SC4=C3SC5=C4C(C6=C5SC7=C6SC(=C7)/C=C/8\C(=O)C9=CC=CC=C9C8=C(C#N)C#N)(C1=CC=C(S1)C)C1=CC=C(S1)C)C1=C2C2=C(S1)C=C(S2)/C=C/1\C(=O)C2=CC=CC=C2C1=C(C#N)C#N)C1=CC=C(S1)C	0.0997179
CC1(C2=C(SC3=C2SC4=C3C(C5=C4C=CC(=C5)/C=C/6\C(=O)C7=CC=CC=C7C6=C(C#N)C#N)(C)C)C8=C1C=C(C=C8)/C=C/9\C(=O)C1=CC=CC=C1C9=C(C#N)C#N)C	0.0863202
CC1=CC=C(C=C1)C2(C3=C(SC4=C3SC5=C4C(C6=C5C=CC(=C6)/C=C/7\C(=O)C8=CC=CC=C8C7=C(C#N)C#N)(C9=CC=C(C=C9)C)C1=CC=C(C=C1)C)C1=C2C=C(C=C1)/C=C/1\C(=O)C2=CC=CC=C2C1=C(C#N)C#N)C1=CC=C(C=C1)C	0.0952112
CC1(C2=C(C3=C(S2)C4=C(S3)C5=C(S4)C(C6=C5C=C(C=C6)/C=C/7\C(=O)C8=CC=CC=C8C7=C(C#N)C#N)(C)C)C9=C1C=CC(=C9)/C=C/1\C(=O)C2=CC=CC=C2C1=C(C#N)C#N)C	0.0922698
CC1=CC=C(C=C1)C2(C3=CC4=C(C=C3C5=C2C6=C(S5)C=C(S6)/C=C\7/C(=C(\C#N)/[N+]#[C-])/C8=CC=CC=C8C7=O)C(C9=C4SC1=C9SC(=C1)/C=C\1/C(=C(/C#N)\[N+]#[C-])/C2=CC=CC=C2C1=O)(C1=CC=C(C=C1)C)C1=CC=C(C=C1)C)C1=CC=C(C=C1)C	0.0985672
CC1=CC(=CC=C1)C2(C3=CC4=C(C=C3C5=C2C6=C(S5)C=C(S6)/C=C\7/C(=C(\C#N)/[N+]#[C-])/C8=CC=CC=C8C7=O)C(C9=C4SC1=C9SC(=C1)/C=C\1/C(=C(/C#N)\[N+]#[C-])/C2=CC=CC=C2C1=O)(C1=CC=CC(=C1)C)C1=CC=CC(=C1)C)C1=CC=CC(=C1)C	0.0985672
CC1=CC=C(S1)C2(C3=CC4=C(C=C3C5=C2C6=C(S5)C=C(S6)/C=C\7/C(=C(\C#N)/[N+]#[C-])/C8=CC=CC=C8C7=O)C(C9=C4SC1=C9SC(=C1)/C=C\1/C(=C(/C#N)\[N+]#[C-])/C2=CC=CC=C2C1=O)(C1=CC=C(S1)C)C1=CC=C(S1)C)C1=CC=C(S1)C	0.0966526
CSC(C1C2=C(C3=C1C=C4C(=C3)C(=C(SC)SC)C5=C4SC(=C5)/C=C\6/C(=C(C#N)C#N)C7=CC=CC=C7C6=O)SC(=C2)/C=C\8/C(=C(C#N)C#N)C9=CC=CC=C9C8=O)SC	0.0621646
CSC(=C1C2=CC3=C(C=C2C4=C1C=C(S4)/C=C\5/C(=C(C#N)C#N)C6=CC=CC=C6C5=O)C(=C(SC)SC)C7=C3SC(=C7)/C=C\8/C(=C(C#N)C#N)C9=CC=CC=C9C8=O)SC	0.0629482
CC1=CC=C(C=C1)C2(C3=C(C=CC(=C3)C4=CC=C(S4)/C=C\5/C(=C(\C#CN)/C#N)/C6C=CC=CC6C5=O)C7=C2C8=C(S7)C9=C(C8(C1=CC=C(C=C1)C)C1=CC=C(C=C1)C)C=C(C=C9)C1=CC=C(S1)/C=C\1/C(=C(C#N)C#N)C2=CC=CC=C2C1=O)C1=CC=C(C=C1)C	0.0846457
C/C=C\C=C\1/C(=C)C(=C(C#N)C#N)/C(=C/C2=CC3=C(S2)C4=C(S3)C5=C(C4(C)C)C=C6C(=C5)C(C7=C6SC8=C7SC(=C8)/C=C\9/C(=C(C#N)C#N)C2=CC=CC=C2C9=O)(C)C)/C1=O	0.0778561
C/C=C\C=C(/C)\C1(C2=C(C3=C1C4=C(S3)C=C(S4)/C=C\5/C(=C(C#N)C#N)C6=CC=CC=C6C5=O)SC7=C2C(C8=C7SC9=C8SC(=C9)/C=C\1/C(=C(C#N)C#N)C2=CC=CC=C2C1=O)(C1=CC=CC=C1)C1=CC=CC=C1)C1=CC=CC=C1	0.0931101
CCCCCCCCC1(C2=CC3=C(C=C2C4=C1C5=C(S4)C=C(S5)/C=C\6/C(=C(C#N)C#N)C7=C(C6=O)SC=C7)C(C8=C3SC9=C8SC(=C9)/C=C\1/C(=C(C#N)C#N)C2=C(C1=O)SC=C2)(CCCCCCCC)CCCCCCCC)CCCCCCCC	0.0513523
CC1=CC=C(C=C1)C2(C3=CC4=C(C=C3C5=C2C6=C(S5)SC(=C6)/C=C\7/C(=C(C#N)C#N)C8=CC=CC=C8C7=O)C(C9=C4SC1=C9C=C(S1)/C=C\1/C(=C(C#N)C#N)C2=CC=CC=C2C1=O)(C1=CC=C(C=C1)C)C1=CC=C(C=C1)C)C1=CC=C(C=C1)C	0.0985672
CC1=CC2=C(S1)SC3=C2C(C4=CC5=C(C=C43)C(C6=C5SC7=C6C=C(S7)CCCC8(C(=C(C#N)C#N)C9=CC=CC=C9C8=O)C)(C)C)(C)C	0.0937097
CC(=C1C2=C(C3=C1C=C(C=C3)C4=CC=C(S4)/C=C/5\C(=O)C6=CC=CC=C6C5=C(C#N)C#N)C=CC(=C2)C7=CC=C(S7)/C=C/8\C(=O)C9=CC=CC=C9C8=C(C#N)C#N)C	0.0844474
CCCCCCC1=CC=C(C=C1)C2(C3=CC4=C(C=C3C5=C2C=C(S5)/C=C\6/C(=C(\C#N)/[N+]#[C-])/C7=CC=CC=C7C6=O)C(C8=C4SC(=C8)/C=C\9/C(=C(/C#N)\[N+]#[C-])/C1=CC=CC=C1C9=O)(C1=CC=C(C=C1)CCCCCC)C1=CC=C(C=C1)CCCCCC)C1=CC=C(C=C1)CCCCCC	0.0630594
CCCCCCC1=CC=C(C=C1)C2(C3=CC4=C(C=C3C5=C2C6=C(S5)C7=C(S6)C8=CC9=C(C=C8C7(C1=CC=C(C=C1)CCCCCC)C1=CC=C(C=C1)CCCCCC)C1=C(C9(C2=CC=C(C=C2)CCCCCC)C2=CC=C(C=C2)CCCCCC)C=C(S1)/C=C\1/C(=C(\C#N)/[N+]#[C-])/C2=CC=CC=C2C1=O)C(C1=C4SC(=C1)/C=C\1/C(=C(C#N)C#N)C2=CC=CC=C2C1=O)(C1=CC=C(C=C1)CCCCCC)C1=CC=C(C=C1)CCCCCC)C1=CC=C(C=C1)CCCCCC	0.0628424
CC1(C2=CC3=C(C=C2C4=C1SC(=C4)/C=C\5/C(=C(C#N)C#N)C6=CC=CC=C6C5=O)C(C7=C3C=C(S7)/C=C\8/C(=C(C#N)C#N)C9=CC=CC=C9C8=O)(C)C)C	0.0788567
CC1(C2=C(C3=C1C4=C(S3)C5=C(S4)C6=C(C5(C)C)SC(=C6)/C=C/7\C(=O)C8=CC=CC=C8C7=C(C#N)C#N)C=C(S2)/C=C/9\C(=O)C1=CC=CC=C1C9=C(C#N)C#N)C	0.0850555
CC1(C2=CC3=C(C=C2C4=C1C5=C(S4)SC(=C5)/C=C\6/C(=C(C#N)C#N)C7=CC=CC=C7C6=O)C(C8=C3SC9=C8C=C(S9)/C=C\1/C(=C(C#N)C#N)C2=CC=CC=C2C1=O)(C)C)C	0.0916326
CCCCCCC1=CC(=CC(=C1)C2(C3=CC4=C(C=C3C5=C2SC(=C5)/C=C\6/C(=C(C#N)C#N)C7=CC8=CC=CC=C8C=C7C6=O)C(C9=C4C=C(S9)/C=C\1/C(=C(C#N)C#N)C2=CC3=CC=CC=C3C=C2C1=O)(C1=CC(=CC(=C1)CCCCCC)CCCCCC)C1=CC(=CC(=C1)CCCCCC)CCCCCC)C1=CC(=CC(=C1)CCCCCC)CCCCCC)CCCCCC	0.0539915
CCCCCCCCCCCCC1=CC=C(C=C1)C2(C3=CC4=C(C=C3C5=C2C6=C(S5)SC(=C6)/C=C\7/C(=C(C#N)C#N)C8=CC=CC=C8C7=O)C(C9=C4SC1=C9C=C(S1)/C=C\1/C(=C(C#N)C#N)C2=CC=CC=C2C1=O)(C1=CC=C(C=C1)CCCCCCCCCCCC)C1=CC=C(C=C1)CCCCCCCCCCCC)C1=CC=C(C=C1)CCCCCCCCCCCC	0.0527558
CCCCCCC1=CC(=CC(=C1)C2(C3=CC4=C(C=C3C5=C2SC(=C5)/C=C\6/C(=C(\C#N)/[N+]#[C-])/C7=CC=CC=C7C6=O)C(C8=C4C=C(S8)/C=C\9/C(=C(/C#N)\[N+]#[C-])/C1=CC=CC=C1C9=O)(C1=CC(=CC(=C1)CCCCCC)CCCCCC)C1=CC(=CC(=C1)CCCCCC)CCCCCC)C1=CC(=CC(=C1)CCCCCC)CCCCCC)CCCCCC	0.0471153
CCCCCCCCC(CCCCCC)/C=C/1\C2=CC3=C(C=C2C4=C1C=C(S4)/C=C\5/C(=C(C#N)C#N)C6=CC=CC=C6C5=O)/C(=C\C(CCCCCC)CCCCCCCC)/C7=C3SC(=C7)/C=C\8/C(=C(\C#N)/[N+]#[C-])/C9=CC=CC=C9C8=O	0.0425653
CC1=CC=C(C=C1)C2(C3=CC4=C(C=C3C5=C2C=C(S5)/C=C\6/C(=C(C#N)C#N)C7=CC=CC=C7C6=O)C(C8=C4SC(=C8)/C=C\9/C(=C(C#N)C#N)C1=CC=CC=C1C9=O)(C1=CC=C(C=C1)C)C1=CC=C(C=C1)C)C1=CC=C(C=C1)C	0.090476
CCCCCCC1=CC(=CC(=C1)C2(C3=C(SC4=C3SC5=C4C(C6=C5SC(=C6)C7=CC=C(S7)/C=C/C=C/8\C(=O)C9=CC1=CC=CC=C1C=C9C8=C(C#N)C#N)(C1=CC(=CC(=C1)CCCCCC)CCCCCC)C1=CC(=CC(=C1)CCCCCC)CCCCCC)C1=C2C=C(S1)C1=CC=C(S1)/C=C/C=C/1\C(=O)C2=CC3=CC=CC=C3C=C2C1=C(C#N)C#N)C1=CC(=CC(=C1)CCCCCC)CCCCCC)CCCCCC	0.0590314
CCCCCCC1=CC=C(C=C1)C2(C3=CC4=C(C=C3C5=C2C6=C(S5)C=C(S6)/C=C/C=C\7/C(=C(\C#N)/[N+]#[C-])/C8=CC=CC=C8C7=O)C(C9=C4SC1=C9SC(=C1)/C=C/C=C\1/C(=C(/C#N)\[N+]#[C-])/C2=CC=CC=C2C1=O)(C1=CC=C(C=C1)CCCCCC)C1=CC=C(C=C1)CCCCCC)C1=CC=C(C=C1)CCCCCC	0.0677943
CCCCCCC1=CC(=CC(=C1)C2(C3=C(C4=C2C5=C(S4)C6=C(S5)C7=C(C6(C8=CC(=CC(=C8)CCCCCC)CCCCCC)C9=CC(=CC(=C9)CCCCCC)CCCCCC)C1=C(S7)C=C(S1)/C=C/C=C\1/C(=C(C#N)C#N)C2=CC4=CC=CC=C4C=C2C1=O)SC(=C3)/C=C/C=C\1/C(=C(C#N)C#N)C2=CC3=CC=CC=C3C=C2C1=O)C1=CC(=CC(=C1)CCCCCC)CCCCCC)CCCCCC	0.0580225
CCCCCCC1=CC=C(C=C1)C2(C3=C(SC4=C3SC5=C4C(C6=C5C=CC(=C6)/C=C/C=C/7\C(=O)C8=CC9=CC=CC=C9C=C8C7=C(C#N)C#N)(C1=CC=C(C=C1)CCCCCC)C1=CC=C(C=C1)CCCCCC)C1=C2C=C(C=C1)/C=C/C=C/1\C(=O)C2=CC3=CC=CC=C3C=C2C1=C(C#N)C#N)C1=CC=C(C=C1)CCCCCC	0.0719002
CCCCCCC1=CC=C(S1)C2(C3=CC4=C(C=C3C5=C2C6=C(S5)C=C(S6)/C=C\7/C(=C(C#N)C#N)C8=C(C7=O)SC9=C8SC=C9)C(C1=C4SC2=C1SC(=C2)/C=C\1/C(=C(C#N)C#N)C2=C(C1=O)SC1=C2SC=C1)(C1=CC=C(S1)CCCCCC)C1=CC=C(S1)CCCCCC)C1=CC=C(S1)CCCCCC	0.0758259
CC1=CC=C(C=C1)C2(C3=CC4=C(C=C3C5=C2C=C6C(=C5)C=C(S6)C=C7C(=C(C#N)C#N)C8=CC=CC=C8C7=O)C(C9=C4SC(=C9)C=C1C(=C(C#N)C#N)C2=CC=CC=C2C1=O)(C1=CC=C(C=C1)C)C1=CC=C(C=C1)C)C1=CC=C(C=C1)C	0.0952112
CC1=CC=C(C=C1)C2(C3=CC4=C(C=C3C5=C2C6=C(S5)C=C(S6)C=C7/C(=C(/C#N)\[N+]#[C-])/C8=CC=CC=C8C7=O)C(C9=C4SC(=C9)C=C1/C(=C(\C#N)/[N+]#[C-])/C2=CC=CC=C2C1=O)(C1=CC=C(C=C1)C)C1=CC=C(C=C1)C)C1=CC=C(C=C1)C	0.0947169
CC1=CC=C(C=C1)C2(C3=CC4=C(C=C3C5=C2C6=C(S5)C7=C(S6)C=C(S7)C8=CC=C(S8)C=C9C(=C(C#N)C#N)C1=CC=CC=C1C9=O)C(C1=C4SC(=C1)C1=CC=C(S1)C=C1C(=C([N+]#[C-])[N+]#[C-])C2=CC=CC=C2C1=O)(C1=CC=C(C=C1)C)C1=CC=C(C=C1)C)C1=CC=C(C=C1)C	0.0998789
CCCCCCC1=CC=C(C=C1)C2(C3=CC4=C(C=C3C5=C2C=C(S5)C6=C(C=C(S6)/C=C\7/C(=C(C#N)C#N)C8=CC=CC=C8C7=O)CC(CC)CCCC)C(C9=C4SC(=C9)C1=C(C=C(S1)/C=C\1/C(=C(C#N)C#N)C2=CC=CC=C2C1=O)CC(CC)CCCC)(C1=CC=C(C=C1)CCCCCC)C1=CC=C(C=C1)CCCCCC)C1=CC=C(C=C1)CCCCCC.CCCCCCC1=CC=C(C=C1)C2(C3=CC4=C(C=C3C5=C2C6=C(S5)C=C(S6)/C=C\7/C(=C(C#N)C#N)C8=CC=CC=C8C7=O)C(C9=C4SC1=C9SC(=C1)/C=C\1/C(=C(C#N)C#N)C2=CC=CC=C2C1=O)(C1=CC=C(C=C…	0.0604869
CC1=CC=C(C=C1)C2(C3=CC4=C(C=C3C5=C2C6=C(S5)C=C(S6)C7=CC=C(S7)C=C8/C(=C(\C#N)/[N+]#[C-])/C9=CC=CC=C9C8=O)C(C1=C4SC2=C1SC1=C2SC(=C1)C1=CC=C(S1)C=C1C(=C(C#N)C#N)C2=CC=CC=C2C1=O)(C1=CC=C(C=C1)C)C1=CC=C(C=C1)C)C1=CC=C(C=C1)C	0.102896
CC1(C2=C(C3=C1C4=C(S3)C5=C(S4)C6=C(C5(C)C)C=C(S6)C=C7C(=C(C#N)C#N)C8=CC=CC=C8C7=O)SC(=C2)C=C9C(=C(C#N)C#N)C1=CC=CC=C1C9=O)C	0.0850555
CCCCCCC1=CC=C(C=C1)C2(C3=CC4=C(C=C3C5=C2C=C(S5)C6=CC=C(S6)/C=C\7/C(=C(C#N)C#N)C8=CC=CC=C8C7=O)C(C9=C4SC(=C9)C1=CC=C(C1)/C=C\1/C(=C(C#N)C#N)C2=CC=CC=C2C1=O)(C1=CC=C(C=C1)CCCCCC)C1=CC=C(C=C1)CCCCCC)C1=CC=C(C=C1)CCCCCC	0.0627847
CCCCCCCCC1=CC=C(C=C1)C2(C3=C(SC4=C3SC5=C4C(C6=C5SC(=C6)/C=C/7\C(=O)C8=CC=CC=C8C7C(C#N)C#N)(C9=CC=C(C=C9)CCCCCCCC)C1=CC=C(C=C1)CCCCCCCC)C1=C2C=C(S1)/C=C/1\C(=O)C2=CC=CC=C2C1C(C#N)C#N)C1=CC=C(C=C1)CCCCCCCC	0.0590074
CC1(C2=C(C3=C1C4=C(S3)C5=C(S4)C6=C(C5(C)C)C7=C(S6)C=C(S7)C8=CC=C(S8)C=C9C(=C(C#N)C#N)C1=CC=CC=C1C9=O)SC1=C2SC(=C1)C1=CC=C(S1)C=C1C(=C(C#N)C#N)C2=CC=CC=C2C1=O)C	0.0982648
CCCCCCC1=CC=C(C=C1)C2(C3=CC4=C(C=C3C5=C2C6=C(S5)C=C(S6)/C=C\7/C(=C(/C)\[N+]#[C-])/C8=CC=CC=C8C7=O)C(C9=C4SC1=C9SC(=C1)/C=C\1/C(=C(\C#N)/[N+]#[C-])/C2=CC=CC=C2C1=O)(C1=CC=C(C=C1)CCCCCC)C1=CC=C(C=C1)CCCCCC)C1=CC=C(C=C1)CCCCCC	0.0711321
CC1=CC=C(C=C1)C2(C3=CC4=C(C=C3C5=C2C6=C(S5)C=C(C=C6)C=C7C(=C(C#N)C#N)C8=CC=CC=C8C7=O)C(C9=C4SC1=C9SC(=C1)C=C1C(=C(C#N)C#N)C2=CC=CC=C2C1=O)(C1=CC=C(C=C1)C)C1=CC=C(C=C1)C)C1=CC=C(C=C1)C	0.0990577
CC1(C2=CC3=C(C=C2C4=C1SC(=C4)C=C5C(=C(C#N)C#N)C6=CC=CC=C6C5=O)C(C7=C3C=C(S7)C=C8C(=C(C#N)C#N)C9=CC=CC=C9C8=O)(C)C)C	0.0788567
CC1=CC=C(S1)C2(C3=C(C4=C2C5=C(S4)C6=C(S5)C7=C(C6(C8=CC=C(S8)C)C9=CC=C(S9)C)C=C(S7)C1=CC=C(S1)C=C1C(=C(C#N)C#N)C2=CC=CC=C2C1=O)SC(=C3)C1=CC=C(S1)C=C1C(=C(C#N)C#N)C2=CC=CC=C2C1=O)C1=CC=C(S1)C	0.0944936
CC1=CC=C(C=C1)C2(C3=C(C=CC(=C3)C4=CC=C(S4)C=C5C(=C(C#N)C#N)C6=CC=CC=C6C5=O)C7=C2C8=C(S7)C9=C(S8)C1=C(C9(C2=CC=C(C=C2)C)C2=CC=C(C=C2)C)C=C(C=C1)C1=CC=C(S1)C=C1C(=C(C#N)C#N)C2=CC=CC=C2C1=O)C1=CC=C(C=C1)C	0.0970453
CC1=CC=C(C=C1)C2(C3=CC4=C(C=C3C5=C2C=C(C=C5)C6=CC=C(S6)C=C7C(=C(C#N)C#N)C8=CC=CC=C8C7=O)C(C9=C4SC(=C9)C1=CC=C(S1)C=C1C(=C(C#N)C#N)C2=CC=CC=C2C1=O)(C1=CC=C(C=C1)C)C1=CC=C(C=C1)C)C1=CC=C(C=C1)C	0.093495
CC1=CC=C(C=C1)C2(C3=C(C4=C2C5=C(S4)C6=C(S5)C7=C(C6(C8=CC=C(C=C8)C)C9=CC=C(C=C9)C)C1=C(S7)C=C(S1)C1=CC=C(S1)C=C1C(=C(C#N)C#N)C2=CC=CC=C2C1=O)SC1=C3SC(=C1)C1=CC=C(S1)C=C1C(=C(C#N)C#N)C2=CC=CC=C2C1=O)C1=CC=C(C=C1)C	0.102472
CC1(C2=C(C=CC(=C2)C3=CC=C(S3)C=C4C(=C(C#N)C#N)C5=CC=CC=C5C4=O)C6=C1C7=C(S6)C8=C(S7)C9=C(C8(C)C)C=C(C=C9)C1=CC=C(S1)C=C1C(=C(C#N)C#N)C2=CC=CC=C2C1=O)C	0.0904352
CC1=CC=C(C=C1)C2(C3=C(C4=C2C5=C(S4)C6=C(S5)C7=C(C6(C8=CC=C(C=C8)C)C9=CC=C(C=C9)C)C=C(S7)C=C1C(=C(C#N)C#N)C2=CC=CC=C2C1=O)SC(=C3)C=C1C(=C(C#N)C#N)C2=CC=CC=C2C1=O)C1=CC=C(C=C1)C	0.0942278
CC1=CC=C(C=C1)C2(C3=CC4=C(C=C3C5=C2C=C(C=C5)C6=CC=C(S6)C=C7C(=C(C#N)C#N)C8=CC=CC=C8C7=O)C(C9=C4C=CC(=C9)C1=CC=C(S1)C=C1C(=C(C#N)C#N)C2=CC=CC=C2C1=O)(C1=CC=C(C=C1)C)C1=CC=C(C=C1)C)C1=CC=C(C=C1)C	0.0939363
CC1=CC=C(C=C1)C2(C3=C(C4=C2C5=C(S4)C6=C(S5)C7=C(C6(C8=CC=C(C=C8)C)C9=CC=C(C=C9)C)C=C(S7)C1=CC=C(S1)C=C1C(=C(C#N)C#N)C2=CC=CC=C2C1=O)SC(=C3)C1=CC=C(S1)C=C1C(=C(C#N)C#N)C2=CC=CC=C2C1=O)C1=CC=C(C=C1)C	0.0961796
CC1=CC=C(C=C1)C2(C3=CC4=C(C=C3C5=C2C6=C(S5)C=C(C=C6)C=C7/C(=C(\C#N)/[N+]#[C-])/C8=CC=CC=C8C7=O)C(C9=C4SC(=C9)C=C1C(=C(C#N)C#N)C2=CC=CC=C2C1=O)(C1=CC=C(C=C1)C)C1=CC=C(C=C1)C)C1=CC=C(C=C1)C	0.0952112
CCCCCCC1=CC\2=C(S1)C3=CC\4=C(C=C3/C2=C(\C#N)/[N+]#[C-])C5=C(/C4=C(\C#N)/[N+]#[C-])C=C(S5)CCCCCC.CCCCCCC1=CC2=C(S1)C3=CC4=C(C=C3C2=O)C5=C(C4=O)C=C(S5)CCCCCC	0.0730842
CC.CC.CCC1(C2=CC3=C(C=C2C4=C1C5=C(S4)C(=C(S5)/C=C\6/C(=C(\C#N)/[N+]#[C-])/C7=CC=CC=C7C6=O)C)C(C8=C3SC9=C8SC(=C9C)/C=C\1/C(=C(/C#N)\[N+]#[C-])/C2=CC=CC=C2C1=O)(CC)CC)CC	0.0756606
CC1=CC=C(C=C1)C2(C3=CC4=C(C=C3C5=C2C=C(C=C5)C=C6C(=C(C#N)C#N)C7=CC=CC=C7C6=O)C(C8=C4SC(=C8)C=C9C(=C(C#N)C#N)C1=CC=CC=C1C9=O)(C1=CC=C(C=C1)C)C1=CC=C(C=C1)C)C1=CC=C(C=C1)C	0.0909722
CC1=CC=C(C=C1)C2(C3=CC4=C(C=C3C5=C2C6=C(S5)C7=C(S6)C=C(S7)C=C8C(=C(C#N)C#N)C9=CC=CC=C9C8=O)C(C1=C4SC(=C1)C=C1C(=C(C#N)C#N)C2=CC=CC=C2C1=O)(C1=CC=C(C=C1)C)C1=CC=C(C=C1)C)C1=CC=C(C=C1)C	0.0985672
CC1=CC=C(S1)C2(C3=C(C=CC(=C3)C=C4C(=C(C#N)C#N)C5=CC=CC=C5C4=O)C6=C2C7=C(S6)C8=C(S7)C9=C(C8(C1=CC=C(S1)C)C1=CC=C(S1)C)C=C(C=C9)C=C1C(=C(C#N)C#N)C2=CC=CC=C2C1=O)C1=CC=C(S1)C	0.0932644
CC1(C2=C(C=CC(=C2)C=C3C(=C(C#N)C#N)C4=CC=CC=C4C3=O)C5=C1C6=C(S5)C7=C(S6)C8=C(C7(C)C)C=C(C=C8)C=C9C(=C(C#N)C#N)C1=CC=CC=C1C9=O)C	0.0863202
CC1=CC=C(C=C1)C2(C3=C(C=CC(=C3)C=C4C(=C(C#N)C#N)C5=CC=CC=C5C4=O)C6=C2C7=C(S6)C8=C(S7)C9=C(C8(C1=CC=C(C=C1)C)C1=CC=C(C=C1)C)C=C(C=C9)C=C1C(=C(C#N)C#N)C2=CC=CC=C2C1=O)C1=CC=C(C=C1)C	0.0952112
CC1=CC=C(S1)C2(C3=C(C4=C2C5=C(S4)C6=C(S5)C7=C(C6(C8=CC=C(S8)C)C9=CC=C(S9)C)C=C(S7)C=C1C(=C(C#N)C#N)C2=CC=CC=C2C1=O)SC(=C3)C=C1C(=C(C#N)C#N)C2=CC=CC=C2C1=O)C1=CC=C(S1)C	0.0923206
CC1=CC=C(C=C1)C2(C3=CC4=C(C=C3C5=C2C6=C(S5)C=C(S6)C7=CC=C(S7)C=C8/C(=C(/C#N)\[N+]#[C-])/C9=CC=CC=C9C8=O)C(C1=C4SC(=C1)C1=CC=C(S1)C=C1/C(=C(\C#N)/[N+]#[C-])/C2=CC=CC=C2C1=O)(C1=CC=C(C=C1)C)C1=CC=C(C=C1)C)C1=CC=C(C=C1)C	0.0966105
CC1(C2=C(C3=C1C4=C(S3)C5=C(S4)C6=C(C5(C)C)C7=C(S6)C=C(S7)C=C8C(=C(C#N)C#N)C9=CC=CC=C9C8=O)SC1=C2SC(=C1)C=C1C(=C(C#N)C#N)C2=CC=CC=C2C1=O)C	0.0962392
CC1=CC=C(C=C1)C2(C3=C(C4=C2C5=C(S4)C6=C(S5)C7=C(C6(C8=CC=C(C=C8)C)C9=CC=C(C=C9)C)C1=C(S7)C=C(S1)C=C1C(=C(C#N)C#N)C2=CC=CC=C2C1=O)SC1=C3SC(=C1)C=C1C(=C(C#N)C#N)C2=CC=CC=C2C1=O)C1=CC=C(C=C1)C	0.101597
CC1=CC=C(C=C1)C2(C3=CC4=C(C=C3C5=C2C6=C(S5)C=C(S6)C=C7/C(=C(\C#N)/[N+]#[C-])/C8=CC=CC=C8C7=O)C(C9=C4SC1=C9SC2=C1SC(=C2)C=C1C(=C(C#N)C#N)C2=CC=CC=C2C1=O)(C1=CC=C(C=C1)C)C1=CC=C(C=C1)C)C1=CC=C(C=C1)C	0.102078
CC1=CC=C(C=C1)C2(C3=CC4=C(C=C3C5=C2C=C6C(=C5)C=C(S6)C=C7C(=C(C#N)C#N)C8=CC=CC=C8C7=O)C(C9=C4SC1=C9SC(=C1)C=C1C(=C(C#N)C#N)C2=CC=CC=C2C1=O)(C1=CC=C(C=C1)C)C1=CC=C(C=C1)C)C1=CC=C(C=C1)C	0.0990577
CC1=CC=C(S1)C2(C3=C(C4=C2C5=C(S4)C6=C(S5)C7=C(C6(C8=CC=C(S8)C)C9=CC=C(S9)C)C1=C(S7)C=C(S1)C=C1C(=C(C#N)C#N)C2=CC=CC=C2C1=O)SC1=C3SC(=C1)C=C1C(=C(C#N)C#N)C2=CC=CC=C2C1=O)C1=CC=C(S1)C	0.0997179
CC1=CC=C(S1)C2(C3=C(C4=C2C5=C(S4)C6=C(S5)C7=C(C6(C8=CC=C(S8)C)C9=CC=C(S9)C)C1=C(S7)C=C(S1)C1=CC=C(S1)C=C1C(=C(C#N)C#N)C2=CC=CC=C2C1=O)SC1=C3SC(=C1)C1=CC=C(S1)C=C1C(=C(C#N)C#N)C2=CC=CC=C2C1=O)C1=CC=C(S1)C	0.100811
CC1(C2=C(C3=C1SC(=C3)C=C4C(=C(C#N)C#N)C5=CC=CC=C5C4=O)SC6=C2SC7=C6C(C8=C7C=C(S8)C=C9C(=C(C#N)C#N)C1=CC=CC=C1C9=O)(C)C)C	0.0850555
CC1(C2=CC3=C(C=C2C4=C1C5=C(S4)SC(=C5)C=C6C(=C(C#N)C#N)C7=CC=CC=C7C6=O)C(C8=C3SC9=C8C=C(S9)C=C1C(=C(C#N)C#N)C2=CC=CC=C2C1=O)(C)C)C	0.0916326
CCCCCCCCCCCCCCCCC1=CC=C(C=C1)C2(C3=C(SC4=C3SC5=C4C(C6=C5SC(=C6)/C=C/7\C(=O)C8=CC=CC=C8C7=C(C#N)C#N)(C9=CC=C(C=C9)CCCCCCCCCCCCCCCC)C1=CC=C(C=C1)CCCCCCCCCCCCCCCC)C1=C2C=C(S1)/C=C/1\C(=O)C2=CC=CC=C2C1=C(C#N)C#N)C1=CC=C(C=C1)CCCCCCCCCCCCCCCC	0.0421617
CCCCCCC1=CC=C(S1)C2(C3=C(C=C4C(=C3)C5=C(C4(C6=CC=C(S6)CCCCCC)C7=CSC(=C7)CCCCCC)C8=C(S5)C=C(S8)/C=C\9/C(=C(C#N)C#N)C1=CC=CC=C1C9=O)C1=C2C2=C(S1)C=C(S2)/C=C\1/C(=C(C#N)C#N)C2=CC=CC=C2C1=O)C1=CC=C(S1)CCCCCC	0.0696824
C/C=C\C=C/CC1(C2=C(C3=C1C4=C(S3)C=C(S4)/C=C\5/C(=C(C#N)C#N)C6=CC=CC=C6C5=O)SC7=C2C(C8=C7SC9=C8SC(=C9)/C=C\1/C(=C(C#N)C#N)C2=CC=CC=C2C1=O)(C1=CC=CC=C1)C1=CC=CC=C1)C1=CC=CC=C1	0.0923286
CC.CC.CCCCCCC1=CC=C(C=C1)C2(C3=CC4=C(C=C3C5=C2C6=C(S5)C=C(S6)/C=C\7/C(=C(C#N)C#N)C8=CC=CC=C8C7=O)C(C9=C4SC1=C9SC(=C1)/C=C\1/C(=C(C#N)C#N)C2=CC=CC=C2C1=O)(C1=CC=C(C=C1)CCCCCC)C1=CC=C(C=C1)CCCCCC)C1=CC=C(C=C1)CCCCCC	0.0682546
CCCCCCC1=CC=C(S1)C2(C3=CC4=C(C=C3C5=C2C6=C(S5)C=C(S6)/C=C\7/C(=C(C#N)C#N)C8=CSC=C8C7=O)C(C9=C4SC1=C9SC(=C1)/C=C\1/C(=C(C#N)C#N)C2=CSC=C2C1=O)(C1=CC=C(S1)C)C1=CC=C(S1)CCCCCC)C1=CC=C(S1)C	0.0803273
CCCCCCC1=CC=C(C=C1)C2(C3=C(SC4=C3SC(=C4)/C=C/5\C(=O)C6=CC=CC=C6C5=C(C#N)C#N)C7=CC8=C(C9=C(C8(C1=CC=C(C=C1)CCCCCC)C1=CC=C(C=C1)CCCCCC)C1=C(S9)C=C(S1)C1=C3C(=C(C4=CC=CC=C14)C1=CC4=C(S1)C1=C(S4)C4=C(C1(C1=CC=C(C=C1)CCCCCC)C1=CC=C(C=C1)CCCCCC)C=C1C5=C(C(C1=C4)(C1=CC=C(C=C1)CCCCCC)C1=CC=C(C=C1)CCCCCC)C1=C(S5)C=C(S1)/C=C/1\C(=O)C4=CC=CC=C4C1=C(C#N)C#N)C=CC=C3)C=C27)C1=CC=C(C=C1)CCCCCC	0.0761471
CCCCCCSC1=CC=C(S1)C2(C3=CC4=C(C=C3C5=C2C6=C(S5)C=C(S6)/C=C\7/C(=C(C#N)C#N)C8=CSC=C8C7=O)C(C9=C4SC1=C9SC(=C1)/C=C\1/C(=C(C#N)C#N)C2=CSC=C2C1=O)(C1=CC=C(S1)SCCCCCC)C1=CC=C(S1)SCCCCCC)C1=CC=C(S1)SCCCCCC	0.0630774
CCCCCCC1=CC=C(C=C1)C2(C3=CC4=C(C=C3C5=C2C6=C(S5)C=C(S6)/C=C\7/C(=C(C#N)C#N)C8=CC=CC=C8C7=O)C(C9=C4SC1=C9SC(=C1)/C=C\1/C(=C(\C#N)/[N+]#[C-])/C2=CC=CC=C2C1=O)(C1=CC=C(C=C1)CCCCCC)C1=CC=C(C=C1)CCCCCC)C1=CC=C(C=C1)CCCCCC	0.070672
CCCCCCC1=CC=C(S1)C2(C3=CC4=C(C=C3C5=C2C6=C(S5)C=C(S6)/C=C\7/C(=C(/C#N)\[N+]#[C-])/C8=CC=CC=C8C7=O)C(C9=C4SC1=C9SC(=C1)/C=C\1/C(=C(\C#N)/[N+]#[C-])/C2=CC=CC=C2C1=O)(C1=CC=C(S1)C)C1=CC=C(S1)CCCCCC)C1=CC=C(S1)CCCCCC	0.074908
CCCCCCC1=CC(=CC=C1)C2(C3=CC4=C(C=C3C5=C2C6=C(S5)C=C(S6)/C=C\7/C(=C(\C#N)/[N+]#[C-])/C8=CC=CC=C8C7=O)C(C9=C4SC1=C9SC(=C1)/C=C\1/C(=C(/C#N)\[N+]#[C-])/C2=CC=CC=C2C1=O)(C1=CC=CC(=C1)CCCCCC)C1=CC=CC(=C1)CCCCCC)C1=CC=CC(=C1)CCCCCC	0.070672
[C-]#[N+]/C(=C\1/C2=CC=CC=C2C(=O)/C1=C/C3=CC4=C(S3)C5=C(C46CCCCC6)C7=C(S5)C8=C(C79CCCCC9)C=C(S8)/C=C\1/C(=C(\C#N)/[N+]#[C-])/C2=CC=CC=C2C1=O)/C#N	0.0708355
[C-]#[N+]/C(=C\1/C2=CC=CC=C2C(=O)/C1=C\C3=CC4=C(C35CCCCC5)C6=C(S4)C7=C(C68CCCCC8)C=C(S7)/C=C\9/C(=C(\C#N)/[N+]#[C-])/C1=CC=CC=C1C9=O)/C#N	0.0632156
C1CCC2(C3=C(SC(=C3)/C=C/4\C(=O)C5=CC=CC=C5C4=C(C#N)C#N)C6=C2C=C(S6)/C=C/7\C(=O)C8=CC=CC=C8C7=C(C#N)C#N)CC1	0.0730166
[C-]#[N+]/C(=C\1/C2=CC=CC=C2C(=O)/C1=C\C3=CC4=C(S3)C5=C(S4)C6=C(C57CCCCC7)C=C(S6)/C=C\8/C(=C(C#N)C#N)C9=CC=CC=C9C8=O)/C#N	0.0809864
[C-]#[N+]/C(=C/1\C2=CC=CC=C2C(=O)\C1=C/C3=CC4=C(S3)C5=C(C46CCCCC6)C=C(S5)/C=C\7/C(=C(/C#N)\[N+]#[C-])/C8=CC=CC=C8C7=O)/C#N	0.0730166
C1CCC2(CC1)C(=CC3=C2C4=C(S3)C5=C(C46CCCCC6)C7=C(S5)C=C(C78CCCCC8)/C=C\9/C(=C(C#N)C#N)C1=CC=CC=C1C9=O)/C=C/1\C(=C(C#N)C#N)C2=CC=CC=C2C1=O	0.0557344
C1CCC2(CC1)C(=CC3=C2C4=C(C35CCCCC5)C6=C(S4)C=C(S6)/C=C\7/C(=C(C#N)C#N)C8=CC=CC=C8C7=O)/C=C\9/C(=C(C#N)C#N)C1=CC=CC=C1C9=O	0.0632156
C1CCC2(CC1)C3=C(C4=C2C5=C(S4)C=C(S5)C=C6C(=O)C7=C(C6=O)C=C(C(=C7)C#N)C#N)SC8=C3SC(=C8)C=C9C(=O)C1=C(C9=O)C=C(C(=C1)C#N)C#N	0.0874019
C1CCC2(CC1)C3=C(C4=C2C5=C(S4)C6=C(S5)C=C(S6)/C=C/7\C(=C(C#N)C#N)C8=CC=CC=C8C7=O)SC(=C3)/C=C\9/C(=C(C#N)C#N)C1=CC=CC=C1C9=O	0.0878344
C1CCC2(CC1)C3=C(C4=C2C5=C(S4)C6=C(S5)C=C(S6)C=C7C(=O)C8=C(C7=O)C=C(C(=C8)C#N)C#N)SC(=C3)C=C9C(=O)C1=C(C9=O)C=C(C(=C1)C#N)C#N	0.0874019
C1CCC2(CC1)C3=CC4=C(C=C3C5=C2C=C(S5)C=C6C(=O)C7=C(C6=O)C=C(C(=C7)C#N)C#N)C8(CCCCC8)C9=C4SC(=C9)C=C1C(=O)C2=C(C1=O)C=C(C(=C2)C#N)C#N	0.0710103
[C-]#[N+]/C(=C\1/C2=CC=CC=C2C(=O)/C1=C\C3=CC4=C(S3)C5=CC6C=C7C(=CC6C=C5C48CCCCC8)C9=C(C71CCCCC1)C=C(S9)/C=C\1/C(=C(C#N)C#N)C2=CC=CC=C2C1=O)/C#N	0.055986
CC1(C2=CC3=C(C=C2C4=C1C=C(S4)/C=C\5/C(=C(\C#N)/[N+]#[C-])/C6=CC=CC=C6C5=O)C(C7=C3SC(=C7)/C=C\8/C(=C(/C#N)\[N+]#[C-])/C9=CC=CC=C9C8=O)(C)C)C	0.0788567
CCC1(C2=C(C3=C1C=C(S3)/C=C\4/C(=C(/C#N)\[N+]#[C-])/C5=CC=CC=C5C4=O)SC(=C2)/C=C\6/C(=C(\C#N)/[N+]#[C-])/C7=CC=CC=C7C6=O)CC	0.0721745
C1CCC2(CC1)C3=C(CC(=C3)/C=C\4/C(=C(C#N)C#N)C5=CC=CC=C5C4=O)C6=C2C7=C(S6)C8=C(S7)C=C(S8)/C=C/9\C(=C(C#N)C#N)C1=CC=CC=C1C9=O	0.0770303
C1CCC2(CC1)C(=CC3=C2C4=C(S3)C5=C(C46CCCCC6)C7=C(S5)C=C(S7)C=C8C(=O)C9=C(C8=O)C=C(C(=C9)C#N)C#N)C=C1C(=O)C2=C(C1=O)C=C(C(=C2)C#N)C#N	0.0705072
C1CCC2(CC1)C(=CC3=C2C4=C(S3)C5=C(S4)C6=C(C57CCCCC7)C=C(S6)C=C8C(=O)C9=C(C8=O)C=C(C(=C9)C#N)C#N)C=C1C(=O)C2=C(C1=O)C=C(C(=C2)C#N)C#N	0.0705072
CCC1(C2=C(SC(=C2)/C=C/3\C(=O)C4=CC=CC=C4C3=C(C#N)C#N)C5=C1C=C(S5)/C=C/6\C(=O)C7=CC=CC=C7C6=C(C#N)C#N)CC	0.0721745
[C-]#[N+]/C(=C\1/C2=CC=CC=C2C(=O)/C1=C/C3=CC4=C(S3)C5=C(C46CCCCC6)C7=C(S5)C8=C(C79CCCCC9)C=C(S8)/C=C\1/C(=C(C#N)C#N)C2=CC=CC=C2C1=O)/C#N	0.0708355
C1CCC2(CC1)C3=C(C4=C2C5=C(S4)C6=C(C57CCCCC7)C=C(S6)/C=C\8/C(=C(C#N)C#N)C9=CC=CC=C9C8=O)SC(=C3)/C=C/1\C(=C(C#N)C#N)C2=CC=CC=C2C1=O	0.0708355
C1CCC2(CC1)C3=C(C4=C2C=C(S4)C=C5C(=O)C6=CC=CC=C6C5=O)SC(=C3)/C=C\7/C(=C(C#N)C#N)C8=CC=CC=C8C7=O	0.0785265
C1CCC2(CC1)C3=C(C4=C2C=C(S4)C=C5C(=O)C6=C(C5=O)C=C(C(=C6)C#N)C#N)SC(=C3)C=C7C(=O)C8=C(C7=O)C=C(C(=C8)C#N)C#N	0.0725984
C1CCC2(CC1)C(=CC3=C2C4=C(S3)C5=C(C46CCCCC6)C7=C(S5)C=C(S7)/C=C/8\C(=C(C#N)C#N)C9=CC=CC=C9C8=O)/C=C\1/C(=C(C#N)C#N)C2=CC=CC=C2C1=O	0.0708355
[C-]#[N+]/C(=C/1\C2=CC=CC=C2C(=O)\C1=C/C3=CC4=C(S3)C5=C(C46CCCCC6)C7=C(S5)C=C(C78CCCCC8)/C=C\9/C(=C(C#N)C#N)C1=CC=CC=C1C9=O)/C#N	0.0632156
C1CCC2(CC1)C(=CC3=C2C4=C(S3)C5=C(S4)C6=C(C57CCCCC7)C=C(S6)/C=C/8\C(=C(C#N)C#N)C9=CC=CC=C9C8=O)/C=C\1/C(=C(C#N)C#N)C2=CC=CC=C2C1=O	0.0708355
C1CCC2(CC1)C3=C(C4=C2C5=C(S4)C6=C(C57CCCCC7)C=C(S6)C=C8C(=O)C9=C(C8=O)C=C(C(=C9)C#N)C#N)SC(=C3)C=C1C(=O)C2=C(C1=O)C=C(C(=C2)C#N)C#N	0.0705072
CC.CC.C1CCC2(C3=C(SC(=C3)/C=C/4\C(=O)C5=CC=CC=C5C4=C(C#N)C#N)C6=C2C=C(S6)/C=C/7\C(=O)C8=CC=CC=C8C7=C(C#N)C#N)CC1	0.0671217
CC1=CC=C(C=C1)C2(C3=CC4=C(C=C3C5=C2C=C(S5)/C=C\6/C(=C(C)C#N)C7=CC=CC=C7C6=O)C(C8=C4SC(=C8)/C=C\9/C(=C(C#N)C#N)C1=CC=CC=C1C9=O)(C1=CC=C(C=C1)C)C1=CC=C(C=C1)C)C1=CC=C(C=C1)C.CC1(C2=CC3=C(C=C2C4=C1C=C(S4)/C=C\5/C(=C(C#N)C#N)C6=CC=CC=C6C5=O)C(C7=C3SC(=C7)/C=C\8/C(=C(C#N)C#N)C9=CC=CC=C9C8=O)(C)C)C	0.0812939
CCCCCCC1=CC(=CC(=C1)C2(C3=C(SC4=C3SC(=C4)/C=C/5\C(=O)C6=CC7=CC=CC=C7C=C6C5=C(C#N)C#N)C8=CC9=C(C1=C(C9(C3=CC(=CC(=C3)CCCCCC)CCCCCC)C3=CC(=CC(=C3)CCCCCC)CCCCCC)C3=C(S1)C1=C(S3)C3=C(C1(C1=CC(=CC(=C1)CCCCCC)CCCCCC)C1=CC(=CC(=C1)CCCCCC)CCCCCC)C=C1C4=C(C(C1=C3)(C1=CC(=CC(=C1)CCCCCC)CCCCCC)C1=CC(=CC(=C1)CCCCCC)CCCCCC)C1=C(S4)C=C(S1)/C=C/1\C(=O)C3=CC4=CC=CC=C4C=C3C1=C(C#N)C#N)C=C28)C1=CC(=CC(=C1)CCCCCC)C…	0.0526213
CCCCCCCCC1(C2=CC3=C(C=C2C4=CC5=C(C=C41)C6=C(C5(CCCCCCCC)CCCCCCCC)C=C(S6)/C=C\7/C(=C(/C#N)\[N+]#[C-])/C8=CC9=CC=CC=C9C=C8C7=O)C(C1=C3SC(=C1)/C=C\1/C(=C(\C#N)/[N+]#[C-])/C2=CC3=CC=CC=C3C=C2C1=O)(CCCCCCCC)CCCCCCCC)CCCCCCCC	0.0453106
CCCCCCCCC1=CC(=CC(=C1)C2(C3=C(C4=C2C5=C(S4)C6=C(S5)C7=C(C6(C8=CC(=CC(=C8)CCCCCCCC)CCCCCCCC)C9=CC(=CC(=C9)CCCCCCCC)CCCCCCCC)C1=C(S7)C=C(S1)/C=C/C=C\1/C(=C(C#N)C#N)C2=CC4=CC=CC=C4C=C2C1=O)SC(=C3)/C=C/C=C\1/C(=C(C#N)C#N)C2=CC3=CC=CC=C3C=C2C1=O)C1=CC(=CC(=C1)CCCCCCCC)CCCCCCCC)CCCCCCCC	0.0500485
CCCCCCC1=CC=C(C=C1)C2(C3=C(C=CC(=C3)/C=C/C=C\4/C(=C(\C#N)/[N+]#[C-])/C5=CC6=CC=CC=C6C=C5C4=O)C7=C2C8=C(S7)C9=C(S8)C1=C(C9(C2=CC=C(C=C2)CCCCCC)C2=CC=C(C=C2)CCCCCC)C=C(C=C1)/C=C/C=C\1/C(=C(/C#N)\[N+]#[C-])/C2=CC3=CC=CC=C3C=C2C1=O)C1=CC=C(C=C1)CCCCCC	0.0719002
CCCCCCC1=CC=C(C=C1)C2(C3=C(C=CC(=C3)C4=CC=C(S4)/C=C\5/C(=C(C#N)C#N)C6=CC=CC=C6C5=O)C7=C2C=C(S7)/C=C\8/C(=C(C#N)C#N)C9=CC=CC=C9C8=O)C1=CC=C(C=C1)CCCCCC	0.0699744
CCCCCCC1=CC=C(C=C1)C2(C3=CC4=C(C=C3C5=C2C6=C(S5)C=C(S6)/C=C/7\C(=C(C#N)C#N)C8=CC=CC=C8C7=O)C(C9=C4SC1=C9SC(=C1)/C=C/1\C(=C([N+]#[C-])[N+]#[C-])C2=CC=CC=C2C1=O)(C1=CC=C(C=C1)CCCCCC)C1=CC=C(C=C1)CCCCCC)C1=CC=C(C=C1)CCCCCC	0.070672
CCCCCCC1=CC=C(C=C1)C2(C3=CC4=C(C=C3C5=C2C6=C(S5)C=C(S6)/C=C/7\C(=C(C#N)C#N)C8=CC=CC=C8C7=O)C(C9=C4SC1=C9SC(=C1)/C=C/1\C(=C(\C#N)/[N+]#[C-])\C2=CC=CC=C2C1=O)(C1=CC=C(C=C1)CCCCCC)C1=CC=C(C=C1)CCCCCC)C1=CC=C(C=C1)CCCCCC	0.070672
CC1=CC=C(C=C1)C2(C3=CC4=C(C=C3C5=C2C6=C(S5)C7=C(S6)C=C(S7)/C=C\8/C(=C(C#N)C#N)C9=CC=CC=C9C8=O)C(C(=C4SC)/C=C/C=C\1/C(=C(C#N)C#N)C2=CC=CC=C2C1=O)(C1=CC=C(C=C1)C)C1=CC=C(C=C1)C)C1=CC=C(C=C1)C	0.0877552
CCCCC(CC)CC/C(=C\1/C2=C(C3=C1C=C4C(=C3)C(=C(SCC(CC)CCCC)SCC(CC)CCCC)C5=C4SC(=C5)/C=C\6/C(=C(C#N)C#N)C7=CC=CC=C7C6=O)SC(=C2)/C=C\8/C(=C(C#N)C#N)C9C=CC=CC9C8=O)/SCC(CC)CCCC	0.0318492
CCCCCCC1=CC=C(C=C1)CS/C(=C\2/C3=C(C4=C2C=C5C(=C4)C(=C(SC6=CC=C(C=C6)CCCCCC)SC7=CC=C(C=C7)CCCCCC)C8=C5SC(=C8)CC9C(=C(C#N)C#N)C1=CC=CC=C1C9=O)SC(=C3)/C=C\1/C(=C(C#N)C#N)C2=CC=CC=C2C1=O)/SC1=CC=C(C=C1)CCCCCC	0.0551226
CCCCC(CC)CC/C(=C\1/C2=C(C3=C1C=C4C(=C3)C(=C(SCC(CC)CCCC)SCC(CC)CCCC)C5=C4SC(=C5)/C=C\6/C(=C(C#N)C#N)C7=CC=CC=C7C6=O)SC(=C2)/C=C\8/C(=C(C#N)C#N)C9=CC=CC=C9C8=O)/SCC(CC)CCCC	0.0382682
CCCCCCC1=CC=C(C=C1)CS/C(=C/2\C3=C(C4=C2C=C5C(=C4)C(=C(SC6=CC=C(C=C6)CCCCCC)SC7=CC=C(C=C7)CCCCCC)C8=C5SC(=C8)/C=C\9/C(=C(C#N)C#N)C1=C(C9=O)C=CCC1C)SC(=C3)/C=C\1/C(=C(C#N)C#N)C2=CC=CC=C2C1=O)/SC1=CC=C(C=C1)CCCCCC	0.0495004
C1CCC2(CC1)C3=C(C4=C2C5=C(S4)C=C(S5)/C=C\6/C(=C(C#N)C#N)C7=CC=CC=C7C6=O)SC(=C3)/C=C\8/C(=C(C#N)C#N)C9=CC=CC=C9C8=O	0.0809864
C/C(=C(\C=C\1/C(=C)C(=O)/C(=C/C2=CC3=C(S2)C4=C(C35CCCCC5)C6=C(S4)C7=C(S6)C8=C(C79CCCCC9)C=C(S8)C=C2C(=O)C3=C(C2=O)C=C(C(=C3)C#N)C#N)/C1=O)/C#N)/C#N	0.0643012
C1CCC2(CC1)C(=CC3=C2C4=C(S3)C5=C(C46CCCCC6)C=C(S5)C=C7C(=O)C8=C(C7=O)C=C(C(=C8)C#N)C#N)C=C9C(=O)C1=C(C9=O)C=C(C(=C1)C#N)C#N	0.0629019
C1CCC2(CC1)C3=C(C4=C2C5=C(S4)C=C(S5)/C=C\6/C(=C(C#N)C#N)C7=CC=CC=C7C6=O)SC8=C3SC(=C8)/C=C/9\C(=C(C#N)C#N)C1=CC=CC=C1C9=O	0.0878344
C1CCC2(CC1)C3=C(C4=C2C5=C(S4)C=C(S5)C=C6C(=O)C7=C(C6=O)C=C(C(=C7)C#N)C#N)SC(=C3)C=C8C(=O)C9=C(C8=O)C=C(C(=C9)C#N)C#N	0.0805576
C1CCC2(C3=C(SC4=C3SC5=C4C6(C7=C5SC(=C7)/C=C/8\C(=O)C9=CC=CC=C9C8=C(C#N)C#N)CCCCC6)C3=C2C=C(S3)/C=C/2\C(=O)C3=CC=CC=C3C2=C(C#N)C#N)CC1	0.0775089
C1CCC2(CC1)C(=CC3=C2C4=C(S3)C5=C(C46CCCCC6)C=C(S5)/C=C\7/C(=C(C#N)C#N)C8=CC=CC=C8C7=O)/C=C\9/C(=C(C#N)C#N)C1=CC=CC=C1C9=O	0.0632156
C1CCC2(CC1)C3=CC4C=C5C(=CC4C=C3C6=C2C=C(S6)C=C7C(=O)C8=C(C7=O)C=C(C(=C8)C#N)C#N)C9(CCCCC9)C1=C5SC(=C1)C=C1C(=O)C2=C(C1=O)C=C(C(=C2)C#N)C#N	0.0557399
C1CCC2(C3=C(SC(=C3)/C=C/4\C(=O)C5=CC=CC=C5C4=C(C#N)C#N)C6=CC7C(C=C26)C=C8C9=C(C2(C8=C7)CCCCC2)C=C(S9)/C=C/2\C(=O)C3=CC=CC=C3C2=C(C#N)C#N)CC1	0.055986
C1CCC2(CC1)C(=CC3=C2C4=C(S3)C5=C(C46CCCCC6)C7=C(S5)C=C(C78CCCCC8)C=C9C(=O)C1=C(C9=O)C=C(C(=C1)C#N)C#N)C=C1C(=O)C2=C(C1=O)C=C(C(=C2)C#N)C#N	0.0554904
C1CCC2(CC1)C(=CC3=C2C4=C(S3)C5=C(S4)C=C(S5)/C=C\6/C(=C(C#N)C#N)C7=CC=CC=C7C6=O)/C=C\8/C(=C(C#N)C#N)C9=CC=CC=C9C8=O	0.0809864
CCC1(C2=C(C3=C1C=C(S3)C=C4C(=O)C5=CC=CC=C5C4=O)SC(=C2)/C=C\6/C(=C(C#N)C#N)C7=CC=CC=C7C6=O)CC	0.0775534
C1CCC2(CC1)C3=C(C4=C2C5=C(S4)C6=C(S5)C7=C(C68CCCCC8)C=C(S7)C=C9C(=O)C1=C(C9=O)C=C(C(=C1)C#N)C#N)SC(=C3)C=C1C(=O)C2=C(C1=O)C=C(C(=C2)C#N)C#N	0.0771719
CC1=CC=C(C=C1)C2(C3=CC4=C(C=C3C5=C2C=C(C=C5)C6=CC=C(S6)CC/C=C\7/C(=C(C#N)C#N)C8=CC=CC=C8C7=O)C(C9=C4SC1=C9SC(=C1)C1=CC=C(S1)/C=C\1/C(=C(C#N)C#N)C2=CC=CC=C2C1=O)(C1=CC=C(C=C1)C)C1=CC=C(C=C1)C)C1=CC=C(C=C1)C	0.0936846
CC1=CC=C(C=C1)C2(C3=CC4=C(C=C3C5=C2C=C(C=C5)C6=CC=C(S6)CC/C=C\7/C(=C(C#N)C#N)C8=CC=CC=C8C7=O)C(C9=C4C=CC(=C9)C1=CC=C(S1)/C=C\1/C(=C(C#N)C#N)C2=CC=CC=C2C1=O)(C1=CC=C(C=C1)C)C1=CC=C(C=C1)C)C1=CC=C(C=C1)C	0.0905308
CC1=CC=C(C=C1)C2(C3=CC4=C(C=C3C5=C2C=C(C=C5)C6=CC=CS6)C(C7=C4SC(=C7)C8=CC=C(S8)/C=C\9/C(=C(C#N)C#N)C1=CC=CC=C1C9=O)(C1=CC=C(C=C1)C)C1=CC=C(C=C1)C)C1=CC=C(C=C1)C	0.102871
CCCCCCC1=CC=C(C=C1)C2(C3=C(C=CC(=C3)C4=CC=C(S4)/C=C\5/C(=C(C#N)C#N)C6=CC=CC=C6C5=O)C7=C2C=C(S7)/C=C\8/C(=C(C#N)C#N)C9=CC=CC=C9C8=O)C1=CC=C(C=C1)CCCCCC.CCCCCCC1=CC=C(C=C1)C2(C3=C(C=CC(=C3)C4=CC=C(S4)C=O)C5=C2C=C(S5)C=O)C6=CC=C(C=C6)CCCCCC.C1C(=C(C#N)C#N)C2=CC=CC=C2C1=O	0.066088
CC.CCCCCCC1=CC=C(C=C1)C2(C3=CC4=C(C=C3C5=C2C6=C(S5)C=C(S6)/C=C/7\C(=C(C#N)C#N)C8=CC=CC=C8C7=O)C(C9=C4SC1=C9SC(=C1)/C=C/1\C(=C([N+]#[C-])[N+]#[C-])C2=CC=CC=C2C1=O)(C1=CC=C(C=C1)CCCCCC)C1=CC=C(C=C1)CCCCCC)C1=CC=C(C=C1)CCCCCC.CC1=CC=C(C=C1)C	0.0708747
CCCCCCCCC1(C2=CC3=C(C=C2C4=CC5=C(C=C41)C6=C(C5(CCCCCCCC)CCCCCCCC)C=C(S6)/C=C\7/C(=C(\C#N)/[N+]#[C-])/C8=CC9=CC=CC=C9C=C8C7=O)C(C1=C3SC(=C1)/C=C\1/C(=C(C#N)[N+]#[C-])C2=CC3=CC=CC=C3C=C2C1=O)(CCCCCCCC)CCCCCCCC)CCCCCCCC	0.0453106
CC.CCCCCCC1=CC=C(C=C1)C2(C3=CC4=C(C=C3C5=C2C6=C(S5)C=C(S6)/C=C/7\C(=C(C#N)C#N)C8=CC=CC=C8C7=O)C(C9=C4SC1=C9SC(=C1)/C=C/1\C(=C([N+]#[C-])[N+]#[C-])C2=CC=CC=C2C1=O)(C1=CC=C(C=C1)CCCCCC)C1=CC=C(C=C1)CCCCCC)C1=CC=C(C=C1)CCCCCC.CC1=CC=C(S1)C	0.0706425
CC1=CC=C(C=C1)C2(C3=CC4=C(C=C3C5=C2C6=C(S5)C=C(S6)CC7/C(=C(/C#N)\[N+]#[C-])/C8=CC=CC=C8C7=O)C(C9=C4SC1=C9SC(=C1)/C=C\1/C(=C(\C#N)/[N+]#[C-])/C2=CC=CC=C2C1=O)(C1=CC=C(C=C1)C)C1=CC=C(C=C1)C)C1=CC=C(C=C1)C	0.0976038
CCCCCCC1=CC=C(C=C1)C2(C3=C(C4=C2C5=C(S4)C6=C(S5)C7=C(C6(C8=CC=C(C=C8)CCCCCC)C9=CC=C(C=C9)CCCCCC)C=C(S7)/C=C\1/C(=C([N+]#[C-])[N+]#[C-])C2=CC=CC=C2C1=O)SC(=C3)/C=C\1/C(=C(C#N)C#N)C2=CC=CC=C2C1=O)C1=CC=C(C=C1)CCCCCC	0.0667507
CCCCCCCCC1(C2=CC3=C(C=C2C4=CC5=C(C=C41)C6=C(C5(CCCCCCCC)CCCCCCCC)C=C(S6)/C=C\7/C(=C(C#N)C#N)C8=CC=CC=C8C7=O)C(C9=C3SC(=C9)CC1/C(=C(\C#N)/[N+]#[C-])/C2=CC=CC=C2C1=O)(CCCCCCCC)CCCCCCCC)CCCCCCCC	0.0368773
CCCCCCCCC1(C2=CC3=C(C=C2C4=CC5=C(C=C41)C6=C(C5(CCCCCCCC)CCCCCCCC)C=C(S6)/C=C\7/C(=C(\C#N)/[N+]#[C-])/C8=CC=CC=C8C7=O)C(C9=C3SC(=C9)/C=C\1/C(=C(C#N)C#N)C2=CC=CC=C2C1=O)(CCCCCCCC)CCCCCCCC)CCCCCCCC	0.0371122
CCCCCCC1=CC(=CC(=C1)C2(C3=CC4=C(C=C3C5=C2SC(=C5)/C=C\6/C(=C(C#N)C#N)C7=CC=CC=C7C6=O)C(C8=C4C=C(S8)/C=C\9/C(=C(C#N)C#N)C1=CC=CC=C1C9=O)(C1=CC(=CC(=C1)CCCCCC)CCCCCC)C1=CC(=CC(=C1)CCCCCC)CCCCCC)C1=CC(=CC(=C1)CCCCCC)CCCCCC)CCCCCC	0.0471153
CCCCCCC1=CC=C(C=C1)C2(C3=CC4=C(C=C3C5=C2C6=C(S5)C=C(S6)/C=C\7/C(=C(C#N)C#N)C8=CC=CC=C8C7=O)C(C9=C4SC1=C9SC(=C1)/C=C\1/C(=C([N+]#[C-])[N+]#[C-])C2=CC=CC=C2C1=O)(C1=CC=C(C=C1)CCCCCC)C1=CC=C(C=C1)CCCCCC)C1=CC=C(C=C1)CCCCCC	0.070672
CCCCCCC1=CC=C(C=C1)C2(C3=CC4=C(C=C3C5=C2C6=C(S5)C=C(S6)/C=C\7/C(=C(C#N)C#N)C8=CC=CC=C8C7=O)C(C9=C4SC1=C9SC(=C1)/C=C\1/C(=C(/C#N)\[N+]#[C-])/C2=CC=CC=C2C1=O)(C1=CC=C(C=C1)CCCCCC)C1=CC=C(C=C1)CCCCCC)C1=CC=C(C=C1)CCCCCC	0.070672
CC1=CC=C(C=C1)C2(C3=C(C4=C2C5=C(S4)C6=C(S5)C7=C(C6(C8=CC=C(C=C8)C)C9=CC=C(C=C9)C)C=C(S7)/C=C\1/C(=C(C#N)C#N)C2=CC=CC=C2C1=O)SC(=C3)CC1C(=C(C#N)C#N)C2=CC=CC=C2C1=O)C1=CC=C(C=C1)C	0.0932678
CCCCCCC1=CC=C(C=C1)C2(C3=CC4=C(C=C3C5=C2C=C(S5)/C=C/6\C=C/C(=C\7/C(=C(\C#N)/[N+]#[C-])/C8=CC=CC=C8C7=O)/S6)C(C9=C4SC(=C9)/C=C/1\C=C/C(=C\2/C(=C(/C#N)\[N+]#[C-])/C3=CC=CC=C3C2=O)/S1)(C1=CC=C(C=C1)CCCCCC)C1=CC=C(C=C1)CCCCCC)C1=CC=C(C=C1)CCCCCC	0.0685691
C1=CC=C(C=C1)C2(C3=C(SC(=C3)/C=C\4/S/C(=C\5/C(=O)C6=CC=CC=C6C5=C(C#N)C#N)/C=C4)C7=C2C=C(S7)/C=C\8/S/C(=C\9/C(=O)C1=CC=CC=C1C9=C(C#N)C#N)/C=C8)C1=CC=CC=C1	0.094428
CC1=CC=C(C=C1)C2(C3=CC4=C(C=C3C5=C2C6=C(S5)C7=C(S6)C8=CC9=C(C=C8C7(C1=CC=C(C=C1)C)C1=CC=C(C=C1)C)C1=C(C9(C2=CC=C(C=C2)C)C2=CC=C(C=C2)C)C=C(S1)/C=C\1/C(=C(\C#N)/[N+]#[C-])/C2=CC=CC=C2C1=O)C(C1=C4SC(=C1)/C=C\1/C(=C(C#N)C#N)C2=CC=CC=C2C1=O)(C1=CC=C(C=C1)C)C1=CC=C(C=C1)C)C1=CC=C(C=C1)C	0.0974714
CC1=CC=C(C=C1)C2(C3=CC4=C(C=C3C5=C2C=C(S5)/C=C\6/C(=C(\C#N)/[N+]#[C-])/C7=CC=CC=C7C6=O)C(C8=C4SC(=C8)/C=C\9/C(=C(/C#N)\[N+]#[C-])/C1=CC=CC=C1C9=O)(C1=CC=C(C=C1)C)C1=CC=C(C=C1)C)C1=CC=C(C=C1)C	0.090476
CCCCCCCCC1(C2=CC=CC=C2C3=C1C=C(C=C3)C4=CC5=C(S4)C6=C(C5=O)C=C(S6)C7=CC8=C(C=C7)C9=CC=CC=C9C8(CCCCCCCC)CCCCCCCC)CCCCCCCC	0.0547071
CCCCCCC1=CC=C(C=C1)C2(C3=CC4=C(C=C3C5=C2C=C(S5)C6=CC(=C(C=C6CCCCCC)/C=C\7/C(=C(C#N)C#N)C8=CC=CC=C8C7=O)CCCCCC)C(C9=C4SC(=C9)C1=CC(=C(C=C1CCCCCC)/C=C\1/C(=C(C#N)C#N)C2=CC=CC=C2C1=O)CCCCCC)(C1=CC=C(C=C1)CCCCCC)C1=CC=C(C=C1)CCCCCC)C1=CC=C(C=C1)CCCCCC	0.0522956
CCCCCCC1=CC=C(C=C1)C2(C3=CC4=C(C=C3C5=C2C6=C(S5)C=C(S6)/C=C\7/C(=C(C#N)C#N)C8=C(C7=O)C=C(C=C8)C)C(C9=C4SC1=C9SC(=C1)/C=C\1/C(=C(C#N)C#N)C2=C(C1=O)C=C(C=C2)C)(C1=CC=C(C=C1)CCCCCC)C1=CC=C(C=C1)CCCCCC)C1=CC=C(C=C1)CCCCCC	0.0695234
CCCCCCC1=CC=C(C=C1)C2(C3=CC4=C(C=C3C5=C2C6=C(S5)C=C(S6)/C=C\7/C(=C(C#N)C#N)C8=C(C7=O)C=C(C(=C8)C)C)C(C9=C4SC1=C9SC(=C1)/C=C\1/C(=C(C#N)C#N)C2=C(C1=O)C=C(C(=C2)C)C)(C1=CC=C(C=C1)CCCCCC)C1=CC=C(C=C1)CCCCCC)C1=CC=C(C=C1)CCCCCC	0.0684115
CCCCCCCCC1(C2=CC3=C(C(C4=C3SC(=C4)/C=C/5\C(=O)C6=CC=CC=C6C5=C(C#N)C#N)(C7=CC=C(C=C7)CCCCCC)C8=CC=C(C=C8)CCCCCC)C=C2C9=CC2=C(C3=C(C2(C2=CC=C(C=C2)CCCCCC)C2=CC=C(C=C2)CCCCCC)C=C(S3)/C=C/2\C(=O)C3=CC=CC=C3C2=C(C#N)C#N)C=C19)CCCCCCCC	0.0539653
CCCCCCC1=CC=C(C=C1)C2(C3=C(SC4=C3SC5=C4C(C6=CC7=C(C(C8=C7SC(=C8)/C=C/9\C(=O)C1=CC=CC=C1C9=C(C#N)C#N)(C1=CC=C(C=C1)CCCCCC)C1=CC=C(C=C1)CCCCCC)C=C56)(C1=CC=C(C=C1)CCCCCC)C1=CC=C(C=C1)CCCCCC)C1=CC3=C(C4=C(C3(C3=CC=C(C=C3)CCCCCC)C3=CC=C(C=C3)CCCCCC)C=C(S4)/C=C/3\C(=O)C4=CC=CC=C4C3=C(C#N)C#N)C=C21)C1=CC=C(C=C1)CCCCCC	0.0628424
CCCCCCC1=CC=C(C=C1)C2(C3=CC4=C(C=C3C5=C2C=C([Se]5)C6=C(C=C(S6)/C=C\7/C(=C(C#N)C#N)C8=CC=CC=C8C7=O)CC(CC)CCCC)C(C9=C4[Se]C(=C9)C1=C(C=C(S1)/C=C\1/C(=C(C#N)C#N)C2=CC=CC=C2C1=O)CC(CC)CCCC)(C1=CC=C(C=C1)CCCCCC)C1=CC=C(C=C1)CCCCCC)C1=CC=C(C=C1)CCCCCC	0.054341
CCCCCCC1=CC=C(C=C1)C2(C3=CC4=C(C=C3C5=C2C6=C(S5)C7=C(S6)C=C(S7)/C=C\8/C(=C(C#N)C#N)C9=CC=CC=C9C8=O)C(C1=C4SC2=C1SC1=C2SC(=C1)/C=C\1/C(=C(C#N)C#N)C2=CC=CC=C2C1=O)(C1=CC=C(C=C1)CCCCCC)C1=CC=C(C=C1)CCCCCC)C1=CC=C(C=C1)CCCCCC	0.0773411
CCCCCCC1=CC=C(C=C1)C2(C3=CC4=C(C=C3C5=C2C=C(S5)C=C6C(=C(C#N)C#N)C7=CC=CC=C7C6=O)C(C8=C4SC(=C8)C=C9C(=C(C#N)C#N)C1=CC=CC=C1C9=O)(C1=CC=C(C=C1)CCCCCC)C1=CC=C(C=C1)CCCCCC)C1=CC=C(C=C1)CCCCCC	0.0630594
CCCCCCC1(C2=CC3=C(C=C2C4=C1C=C(S4)C=C5C(=C(C#N)C#N)C6=CC=CC=C6C5=O)C(C7=C3SC(=C7)C=C8C(=C(C#N)C#N)C9=CC=CC=C9C8=O)(CCCCCC)CCCCCC)CCCCCC	0.048332
CCCCCCC1=CC=C(C=C1)C2(C3=CC4=C(C=C3C5=C2C6=C(S5)C=C(S6)C=C7C(=C(C#N)C#N)C8=C(C7=O)C=C(C=C8)C)C(C9=C4SC1=C9SC(=C1)C=C1C(=C(C#N)C#N)C2=C(C1=O)C=C(C=C2)C)(C1=CC=C(C=C1)CCCCCC)C1=CC=C(C=C1)CCCCCC)C1=CC=C(C=C1)CCCCCC	0.0695234
CCCCCCC1=CC=C(C=C1)C2(C3=C(C4=C2C5=C(S4)C6=C(S5)C7=C(C6(C8=CC=C(C=C8)CCCCCC)C9=CC=C(C=C9)CCCCCC)C=C(S7)C=C1C(=C(C#N)C#N)C2=CC=CC=C2C1=O)SC(=C3)C=C1C(=C(C#N)C#N)C2=CC=CC=C2C1=O)C1=CC=C(C=C1)CCCCCC	0.0667507
CCCCCCC1=CC=C(C=C1)C2(C3=CC4=C(C=C3C5=C2C6=C(S5)C=C(S6)C=C7C(=C(C#N)C#N)C8=C(C7=O)C=C(C(=C8)C)C)C(C9=C4SC1=C9SC(=C1)C=C1C(=C(C#N)C#N)C2=C(C1=O)C=C(C(=C2)C)C)(C1=CC=C(C=C1)CCCCCC)C1=CC=C(C=C1)CCCCCC)C1=CC=C(C=C1)CCCCCC	0.0684115
CCCCCCC1=CC=C(C=C1)C2(C3=CC4=C(C=C3C5=C2C6=C(S5)C=C(S6)/C=C/7\C(=C(C#N)C#N)C8=CSC=C8C7=O)C(C9=C4SC1=C9SC(=C1)/C=C\1/C(=C(C#N)C#N)C2=CSC=C2C1=O)(C1=CC=C(C=C1)CCCCCC)C1=CC=C(C=C1)CCCCCC)C1=CC=C(C=C1)CCCCCC	0.0701737
CCCCCCC1=CC=C(C=C1)C2(C3=CC4=C(C=C3C5=C2C=C(S5)/C=C/6\C(=C(C#N)C#N)C7=CC=CC=C7C6=O)C(C8=C4SC(=C8)/C=C\9/C(=C(C#N)C#N)C1=CC=CC=C1C9=O)(C1=CC=C(C=C1)CCCCCC)C1=CC=C(C=C1)CCCCCC)C1=CC=C(C=C1)CCCCCC	0.0630594
CCCCCCC1(C2=CC3=C(C=C2C4=C1C=C(S4)/C=C\5/C(=C(C#N)C#N)C6=CSC=C6C5=O)C(C7=C3SC(=C7)/C=C\8/C(=C(C#N)C#N)C9=CSC=C9C8=O)(CCCCCC)CCCCCC)CCCCCC	0.047867
CCCCCCC1=CC=C(C=C1)C2(C3=C(SC4=C3SC5=C4C(C6=C5SC7=C6SC(=C7)/C=C\8/C(=O)C9=CC=CC=C9C8=C(C#N)C#N)(C1=CC=C(C=C1)CCCCCC)C1=CC=C(C=C1)CCCCCC)C1=C2C2=C(S1)C=C(S2)/C=C\1/C(=O)C2=CC=CC=C2C1=C(C#N)C#N)C1=CC=C(C=C1)CCCCCC	0.0738594
CCCCCCC1=CC=C(C=C1)C2(C3=CC4=C(C=C3C5=C2C=C(S5)/C=C/6\C(=C(C#N)C#N)C7=CSC=C7C6=O)C(C8=C4SC(=C8)/C=C\9/C(=C(C#N)C#N)C1=CSC=C1C9=O)(C1=CC=C(C=C1)CCCCCC)C1=CC=C(C=C1)CCCCCC)C1=CC=C(C=C1)CCCCCC	0.0625835
CCCCCCC1=CC=C(C=C1)C2(C3=CC4=C(C=C3C5=C2C6=C(S5)C=C(S6)/C=C/7\C(=C(C#N)C#N)C8=C(C7=O)C=C(C=C8)C)C(C9=C4SC1=C9SC(=C1)/C=C\1/C(=C(C#N)C#N)C2=C(C1=O)C=C(C=C2)C)(C1=CC=C(C=C1)CCCCCC)C1=CC=C(C=C1)CCCCCC)C1=CC=C(C=C1)CCCCCC	0.0695234
CCCCCCC1=CC=C(C=C1)C2(C3=C(SC4=C3SC5=C4C(C6=C5SC(=C6)/C=C\7/C(=O)C8=CC=CC=C8C7=C(C#N)C#N)(C9=CC=C(C=C9)CCCCCC)C1=CC=C(C=C1)CCCCCC)C1=C2C=C(S1)/C=C\1/C(=O)C2=CC=CC=C2C1=C(C#N)C#N)C1=CC=C(C=C1)CCCCCC	0.0667507
CCCCCCC1=CC=C(C=C1)C2(C3=CC4=C(C=C3C5=C2C6=C(S5)C=C(S6)/C=C/7\C(=C(C#N)C#N)C8=C(C7=O)C=C(C(=C8)C)C)C(C9=C4SC1=C9SC(=C1)/C=C\1/C(=C(C#N)C#N)C2=C(C1=O)C=C(C(=C2)C)C)(C1=CC=C(C=C1)CCCCCC)C1=CC=C(C=C1)CCCCCC)C1=CC=C(C=C1)CCCCCC	0.0684115
CCCCCCC1=CC=C(S1)C2(C3=CC4=C(C=C3C5=C2C6=C(S5)C=C(S6)/C=C\7/C(=C(C#N)C#N)C8=CC=CC=C8C7=O)C(C9=C4SC1=C9SC(=C1)/C=C\1/C(=C(C#N)C#N)C2=CC=CC=C2C1=O)(C1=CC=C(S1)C)C1=CC=C(S1)CCCCCC)C1=CC=C(S1)CCCCCC	0.074908
CCCCCCC1(C2=CC3=C(C=C2C4=C1C=C(S4)/C=C\5/C(=C(C#N)C#N)C6=CC=CC=C6C5=O)C(C7=C3SC(=C7)/C=C\8/C(=C(\C#N)/[N+]#[C-])/C9=CC=CC=C9C8=O)(CCCCCC)CCCCCC)CCCCCC	0.048332
CCCCCCC1=CC=C(C=C1)C2(C3=CC4=C(C=C3C5=C2C=C(S5)/C=C\6/C(=C(C#N)C#N)C7=CC=CC=C7C6=O)C(C8=C4SC(=C8)/C=C\9/C(=C(C#N)C#N)C1=CC=CC=C1C9=O)(C1=CC=C(C=C1)CCCCCC)C1=CC=C(C=C1)CCCCCC)C1=CC=C(C=C1)CCCCCC	0.0630594
CSC(C1C2=C(C3=C1C=C4C(=C3)C(=C(SC)SC)C5=C4SC(=C5)/C=C\6/C(=C(\C#N)/[N+]#[C-])/C7=CC=CC=C7C6=O)SC(=C2)/C=C\8/C(=C(/C#N)\[N+]#[C-])/C9=CC=CC=C9C8=O)SC	0.0621646
CCCCCCC1=CC(=CC=C1)C2(C3=CC4=C(C=C3C5=C2C6=C(S5)C=C(S6)/C=C\7/C(=C(C#N)C#N)C8=CC=CC=C8C7=O)C(C9=C4SC1=C9SC(=C1)/C=C\1/C(=C(\C#N)/[N+]#[C-])/C2=CC=CC=C2C1=O)(C1=CC=CC(=C1)CCCCCC)C1=CC=CC(=C1)CCCCCC)C1=CC=CC(=C1)CCCCCC	0.070672
CCCCCCCCC(CCCCCC)C=C1C2=CC3=C(C=C2C4=C1C=C(S4)/C=C\5/C(=C(C#N)C#N)C6=CC=CC=C6C5=O)C(=CC(CCCCCC)CCCCCCCC)C7=C3SC(=C7)/C=C\8/C(=C(\C#N)/[N+]#[C-])/C9=CC=CC=C9C8=O	0.0425653
CCC1(C2=CC3=C(C=C2C4=C1C5=C(S4)C(=C(S5)/C=C\6/C(=C(\C#N)/[N+]#[C-])/C7=CC=CC=C7C6=O)C)C(C8=C3SC9=C8SC(=C9C)/C=C\1/C(=C(/C#N)\[N+]#[C-])/C2=CC=CC=C2C1=O)(CC)CC)CC	0.0802235
CCCCCCC1=CC=C(C=C1)C2(C3=CC4=C(C=C3C5=C2C6=C(S5)C=C(S6)C=C7/C(=C(\C#N)/[N+]#[C-])/C8=C(C7=O)SC(=C8)C)C(C9=C4SC1=C9SC(=C1)C=C1/C(=C(/C#N)\[N+]#[C-])/C2=C(C1=O)SC(=C2)C)(C1=CC=C(C=C1)CCCCCC)C1=CC=C(C=C1)CCCCCC)C1=CC=C(C=C1)CCCCCC	0.0690411
CC1(C2=C(C3=C1C=C(C=C3)/C=C/4\C(=O)C5=C(C4=C(C#N)C#N)C6=C(S5)C=CS6)C=CC(=C2)/C=C/7\C(=O)C8=C(C7=C(C#N)C#N)C9=C(S8)C=CS9)C	0.0924838
CC1(C2=CC3=C(C=C2C4=CC5=C(C=C41)C6=C(C5(C7=CC=CC=C7)C8=CC=CC=C8)C=C(S6)/C=C\9/C(=C(C#N)C#N)C1=C(C9=O)SC2=C1SC=C2)C(C1C3SC(=C1)/C=C\1/C(=C(C#N)C#N)C2=C(C1=O)SC1=C2SC=C1)(C1=CC=CC=C1)C1=CC=CC=C1)C	0.09291
CC1(C2=CC3=C(C=C2C4=C1C(=CS4)/C=C\5/C(=C(\C#N)/[N+]#[C-])/C6=CC=CC=C6C5=O)C(C7=C3SC(=C7)/C=C/8\C(=C(\C#N)/[N+]#[C-])\C9=CC=CC=C9C8=O)(C)C)C	0.0788567
CC1=CC=C(C1)C2(C3=CC4=C(C=C3C5=C2C6=C(S5)C=C(S6)/C=C\7/C(=C(/C#N)\[N+]#[C-])/C8=CC=CC=C8C7=O)C(C9=C4SC1=C9SC(=C1)/C=C\1/C(=C(\C#N)/[N+]#[C-])/C2=CC=CC=C2C1=O)(C1=CC=C(S1)C)C1=CC=C(S1)C)C1=CC=C(S1)C	0.0899045
CC1=CC=C(C=C1)C2(C3=C(C=C4C(=C3)C5=C(C4(C6=CC=CC(=C6)C)C7=CC=CC(=C7)C)C8=C(S5)C=C(S8)/C=C\9/C(=C(\C#N)/[N+]#[C-])/C1=CC=CC=C1C9=O)C1=C2C2=C(S1)C=C(S2)/C=C\1/C(=C(/C#N)\[N+]#[C-])/C2=CC=CC=C2C1=O)C1=CC=C(C=C1)C	0.0985672
[C-]#[N+]C(=C\1C2=CC=CC=C2C(=O)/C1=C\C3=CC4=C(C35CCCCC5)C6=C(S4)C7=C(C68CCCCC8)C=C(S7)/C=C\9/C(=C(\C#N)/[N+]#[C-])/C1=CC=CC=C1C9=O)C#N	0.0632156
CC(=C\1C2=CC=CC=C2C(=O)/C1=C\C3=CC4=C(S3)C5=C(C46CCCCC6)C=C(S5)/C=C\7/C(=C(\C#N)/[N+]#[C-])/C8=CC=CC=C8C7=O)[N+]#[C-]	0.0742068
CC1(C2=CC3=C(C=C2C4=C1C=C(S4)/C=C\5/C6=CC=CC=C6C(=O)C5=O)C(C7=C3SC(=C7)/C=C\8/C9=CC=CC=C9C(=O)C8=O)(C)C)C	0.0902557
CC(=C\1C2=CC=CC=C2C(=O)/C1=C\C3=CC4=C(S3)C5=C(C46CCCCC6)C=C(S5)/C=C\7/C(=C(C#N)C#N)C8=CC=CC=C8C7=O)C#N	0.0742068
[C-]#[N+]C(=C\1C2=CC=CC=C2C(=O)/C1=C\C3=CC4=C(S3)C5=C(C46CCCCC6)C=C(S5)/C=C\7/C(=C(\C#N)/[N+]#[C-])/C8=CC=CC=C8C7=O)C#N	0.0730166
[C-]#[N+]C(=C\1C2=CC=CC=C2C(=O)/C1=C\C3=CC4=C(S3)C5=C(C46CCCCC6)C7=C(S5)C=C(C78CCCCC8)/C=C\9/C(=C(C#N)C#N)C1=CC=CC=C1C9=O)C#N	0.0632156
CCCCCCC1=CC=C(C=C1)C2(C3=CC4=C(C=C3C5=C2C6=C(S5)C=C(S6)/C=C\7/C(=C(C#N)C#N)C8=CC=CC=C8C7=O)C(C9=C4SC1=C9SC(=C1)/C=C\1/C(=C(C#N)[N+]#[C-])C2=CC=CC=C2C1=O)(C1=CC=C(C=C1)CCCCCC)C1=CC=C(C=C1)CCCCCC)C1=CC=C(C=C1)CCCCCC	0.070672
CC1(C2=CC3=C(C=C2C4=C1C=C(S4)/C=C\5/C(=C(\C#N)/[N+]#[C-])/C6=CC=CC=C6C5=O)C(C7=C3SC(=C7)/C=C\8/C(=C(C#N)[N+]#[C-])C9=CC=CC=C9C8=O)(C)C)C	0.0788567
CCCCCCC1=CC=C(C=C1)C2(C3=CC4=C(C=C3C5=C2C6=C(S5)C=C(S6)/C=C\7/C(=C(\C#N)/[N+]#[C-])/C8=CC=CC=C8C7=O)C(C9=C4SC1=C9SC(=C1)/C=C\1/C(=C(C#N)[N+]#[C-])C2=CC=CC=C2C1=O)(C1=CC=C(C=C1)CCCCCC)C1=CC=C(C=C1)CCCCCC)C1=CC=C(C=C1)CCCCCC	0.070672
C#CC(=C\1C2=CC=CC=C2C(=O)/C1=C\C3=CC4=C(S3)C5=C(C46CCCCC6)C=C(S5)/C=C\7/C(=C(C#N)C#N)C8=CC=CC=C8C7=O)C#N	0.0731221
CC1(C(=CC2=C1C3=C(S2)C4=C(S3)C5=C(C4(C)C)C=C(S5)C=C6C(=O)C7=C(C6=O)C=C(C(=C7)C#N)C#N)C=C8C(=O)C9=C(C8=O)C=C(C(=C9)C#N)C#N)C	0.0778365
[C-]#[N+]C(=C\1C2=CC=CC=C2C(=O)/C1=C/C3=CC4=C(S3)C5=C(C46CCCCC6)C7=C(S5)C8=C(C79CCCCC9)C=C(S8)/C=C\1/C(=C(\C#N)/[N+]#[C-])/C2=CC=CC=C2C1=O)C#N	0.0708355
[C-]#[N+]C(=C\1C2=CC=CC=C2C(=O)/C1=C/C3=CC4=C(S3)C5=C(C46CCCCC6)C7=C(S5)C8=C(C79CCCCC9)C=C(S8)/C=C\1/C(=C(C#N)C#N)C2=CC=CC=C2C1=O)C#N	0.0708355
CCCCCCC1=CC=C(S1)C2(C3=CC4=C(C=C3C5=C2C6=C(S5)C=C(S6)/C=C\7/C(=C(C#N)[N+]#[C-])C8=CC=CC=C8C7=O)C(C9=C4SC1=C9SC(=C1)/C=C\1/C(=C(\C#N)/[N+]#[C-])/C2=CC=CC=C2C1=O)(C1=CC=C(S1)C)C1=CC=C(S1)CCCCCC)C1=CC=C(S1)CCCCCC	0.074908
CCCCCCC1=CC(=CC=C1)C2(C3=CC4=C(C=C3C5=C2C6=C(S5)C=C(S6)/C=C\7/C(=C(\C#N)/[N+]#[C-])/C8=CC=CC=C8C7=O)C(C9=C4SC1=C9SC(=C1)/C=C\1/C(=C(C#N)[N+]#[C-])C2=CC=CC=C2C1=O)(C1=CC=CC(=C1)CCCCCC)C1=CC=CC(=C1)CCCCCC)C1=CC=CC(=C1)CCCCCC	0.070672
CC1=CC=C(C=C1)C2(C3=CC4=C(C=C3C5=C2C=C(S5)/C=C\6/C(=C(C)[N+]#[C-])C7=CC=CC=C7C6=O)C(C8=C4SC(=C8)/C=C\9/C(=C(\C#N)/[N+]#[C-])/C1=CC=CC=C1C9=O)(C1=CC=C(C=C1)C)C1=CC=C(C=C1)C)C1=CC=C(C=C1)C	0.091384
CCC1(C2=C(C3=C1C=C(S3)C=C4C(=O)C5=CC=CC=C5C4=O)SC(=C2)/C=C\6/C(=C(/C)\C#N)/C7=CC=CC=C7C6=O)CC	0.0788975
[C-]#[N+]C(=C\1C2=CC=CC=C2C(=O)/C1=C\C3=CC4=C(S3)C5=C(S4)C6=C(C57CCCCC7)C=C(S6)/C=C\8/C(=C(C#N)C#N)C9=CC=CC=C9C8=O)C#N	0.0809864
CCC1(C2=C(C3=C1C=C(S3)/C=C\4/C(=C(\C#N)/[N+]#[C-])/C5=CC=CC=C5C4=O)SC(=C2)/C=C\6/C(=C(C#N)[N+]#[C-])C7=CC=CC=C7C6=O)CC	0.0721745
CC1(C2=CC3=C(C=C2C4=C1C=C(S4)C=C5C(=O)C6=C(C5=O)C=C(C(=C6)C#N)C#N)C(C7=C3SC(=C7)C=C8C(=O)C9=C(C8=O)C=C(C(=C9)C#N)C#N)(C)C)C	0.07845
[C-]#[N+]C(=C\1C2=CC=CC=C2C(=O)/C1=C\C3=CC4=C(S3)C5=CC6C=C7C(=CC6C=C5C48CCCCC8)C9=C(C71CCCCC1)C=C(S9)/C=C\1/C(=C(C#N)C#N)C2=CC=CC=C2C1=O)C#N	0.055986
CC1(C(=CC2=C1C3=C(S2)C4=C(C3(C)C)C=C(S4)C=C5C(=O)C6=C(C5=O)C=C(C(=C6)C#N)C#N)C=C7C(=O)C8=C(C7=O)C=C(C(=C8)C#N)C#N)C	0.0699537
CC1=CC=C(C=C1)C2(C3=CC4=C(C=C3C5=C2C=C(S5)/C=C\6/C(=C(C)C#N)C7=CC=CC=C7C6=O)C(C8=C4SC(=C8)/C=C\9/C(=C(C#N)C#N)C1=CC=CC=C1C9=O)(C1=CC=C(C=C1)C)C1=CC=C(C=C1)C)C1=CC=C(C=C1)C	0.091384
CC1(C2=C(C3=C1C4=C(S3)C5=C(C4(C)C)C=C(S5)C=C6C(=O)C7=C(C6=O)C=C(C(=C7)C#N)C#N)SC(=C2)C=C8C(=O)C9=C(C8=O)C=C(C(=C9)C#N)C#N)C	0.0778365
CC1(C2=C(C3=C1C=C(S3)C=C4C(=O)C5=C(C4=O)C=C(C(=C5)C#N)C#N)SC(=C2)C=C6C(=O)C7=C(C6=O)C=C(C(=C7)C#N)C#N)C	0.0770826
CCCCCCCCCCCCCCCCC1(C2=CC3=C(C=C2C4=C1C=C(S4)C=C5C(=C(C#N)C#N)C6=CC=CC=C6C5=O)C(C7=C3SC(=C7)C=C8C(=C(C#N)C#N)C9=CC=CC=C9C8=O)(CCCCCCCCCCCCCCCC)CCCCCCCCCCCCCCCC)CCCCCCCCCCCCCCCC	0.0272418
CCCCCCC1=CC=C(C=C1)C2(C3=CC4=C(C=C3C5=C2C6=C(S5)C=C(S6)C=C7C(=C(C#N)C#N)C8=C(C7=O)C=C(C=C8)C)C(C9=C4SC1=C9SC(=C1)C=C1C(=C(C#N)C#N)C2=C(C1=O)C=CC(=C2)C)(C1=CC=C(C=C1)CCCCCC)C1=CC=C(C=C1)CCCCCC)C1=CC=C(C=C1)CCCCCC	0.0695234
CC1=CC=C(S1)C2(C3=CC4=C(C=C3C5=C2C6=C(S5)C=C(S6)/C=C\7/C(=C(C#N)C#N)C8=CC=CC=C8C7=O)C(C9=C4SC1=C9SC(=C1)/C=C\1/C(=C(C#N)C#N)C2=CC=CC=C2C1=O)(C1=CC=C(S1)C)C1=CC=C(S1)C)C1=CC=C(S1)C	0.0966526
CC1=CC=C(C=C1)C2(C3=CC4=C(C=C3C5=C2C6=C(S5)C=C(S6)/C=C\7/C(=C(C#N)C#N)C8=C(C7=O)C=C(C(=C8)C)C)C(C9=C4SC1=C9SC(=C1)/C=C\1/C(=C(C#N)C#N)C2=C(C1=O)C=C(C(=C2)C)C)(C1=CC=C(C=C1)C)C1=CC=C(C=C1)C)C1=CC=C(C=C1)C	0.0942247
CCCCCCC1=CC=C(C=C1)C2(C3=CC4=C(C=C3C5=C2C6=C(S5)C=C(S6)/C=C/7\C(=C(C#N)C#N)C8=CC=CC=C8C7=O)C(C9=C4SC1=C9SC(=C1)/C=C/1\C(=C(C#N)[N+]#[C-])C2=CC=CC=C2C1=O)(C1=CC=C(C=C1)CCCCCC)C1=CC=C(C=C1)CCCCCC)C1=CC=C(C=C1)CCCCCC	0.070672
CCCCCCC1=CC=C(C=C1)C2(C3=C(C=CC(=C3)/C=C/C=C\4/C(=C(C#N)[N+]#[C-])C5=CC6=CC=CC=C6C=C5C4=O)C7=C2C8=C(S7)C9=C(S8)C1=C(C9(C2=CC=C(C=C2)CCCCCC)C2=CC=C(C=C2)CCCCCC)C=C(C=C1)/C=C/C=C\1/C(=C(\C#N)/[N+]#[C-])/C2=CC3=CC=CC=C3C=C2C1=O)C1=CC=C(C=C1)CCCCCC	0.0719002
CCCCCCC1=CC=C(C=C1)C2(C3=C(SC4=C3SC5=C4C(C6=C5SC(=C6)/C=C/7\C(=O)C8=CC=CC=C8C7=C(C#N)C#N)(C9=CC=C(C=C9)CCCCCC)C1=CC=C(C=C1)CCCCCC)C1=C2C=C(S1)/C=C/1\C(=O)C2=CC=CC=C2C1=C(C#N)C#N)C1=CC=C(C=C1)CCCCCC	0.0667507
CCCCCCC1=CC=C(C=C1)C2(C3=C(SC4=C3SC(=C4)/C=C/5\C(=O)C6=CC=CC=C6C5=C(C#N)C#N)C7=CC8=C(C9=C(C8(C1=CC=C(C=C1)CCCCCC)C1=CC=C(C=C1)CCCCCC)C1=C(S9)C=C(S1)/C=C/1\C(=O)C3=CC=CC=C3C1=C(C#N)C#N)C=C27)C1=CC=C(C=C1)CCCCCC.CCCCCCC1=CC=C(C=C1)C2(C3=C(SC4=C3SC(=C4)/C=C/5\C(=O)C6=CC=CC=C6C5=C(C#N)C#N)C7=CC8=C(C9=C(C8(C1=CC=C(C=C1)CCCCCC)C1=CC=C(C=C1)CCCCCC)C1=C(S9)C=C(S1)/C=C/1\C(=O)C3=CC=CC=C3C1=C(C#N)C#N)C=C27…	0.0679274
CCCCCCC1(C2=C(SC(=C2)/C=C/3\C(=O)C4=CC=CC=C4C3=C(C#N)C#N)C5=CC6=C(C7=C(C6(CCCCCC)CCCCCC)C=C(S7)/C=C/8\C(=O)C9=CC=CC=C9C8=C(C#N)C#N)C=C15)CCCCCC.CCCCCCC1(C2=C(SC(=C2)/C=C/3\C(=O)C4=CC=CC=C4C3=C(C#N)C#N)C5=CC6=C(C7=C(C6(CCCCCC)CCCCCC)C=C(S7)/C=C/8\C(=O)C9=CC=CC=C9C8=C(C#N)C#N)C=C15)CCCCCC.CCCCCCC1(C2=C(SC(=C2)/C=C/3\C(=O)C4=CC=CC=C4C3=C(C#N)C#N)C5=CC6=C(C7=C(C6(CCCCCC)CCCCCC)C=C(S7)/C=C/8\C(=O)C9=C…	0.0431937
CCCCCCC1=CC=C(C=C1)C2(C3=CC4=C(C=C3C5=C2C=C(S5)/C=C\6/C(=C(C#N)C#N)C7=CC=CC=C7C6=O)C(C8=C4SC(=C8)/C=C\9/C(=C(C#N)C#N)C1=CC=CC=C1C9=O)(C1=CC=C(C=C1)CCCCCC)C1=CC=C(C=C1)CCCCCC)C1=CC=C(C=C1)CCCCCC.C(Cl)Cl.C(Cl)Cl	0.0569582
CCCCCCC1=CC=C(C=C1)C2(C3=CC4=C(C=C3C5=C2C6=C(S5)C=C(S6)/C=C\7/C(=C(C#N)C#N)C8=C(C7=O)C=C(C=C8)C)C(C9=C4SC1=C9SC(=C1)/C=C\1/C(=C(C#N)C#N)C2=C(C1=O)C=CC(=C2)C)(C1=CC=C(C=C1)CCCCCC)C1=CC=C(C=C1)CCCCCC)C1=CC=C(C=C1)CCCCCC	0.0695234
CC1=CC=C(C=C1)C2(C3=CC4=C(C=C3C5=C2C6=C(S5)C=C(S6)/C=C\7/C(=C(C#N)C#N)C8=C(C7=O)C=C9CCCCC9=C8)C(C1=C4SC2=C1SC(=C2)/C=C\1/C(=C(C#N)C#N)C2=C(C1=O)C=C1CCCCC1=C2)(C1=CC=C(C=C1)C)C1=CC=C(C=C1)C)C1=CC=C(C=C1)C	0.0905231
